# Supplementary material for: SF3B1 mutant-induced missplicing of MAP3K7 causes anemia in myelodysplastic syndromes
Source: PubMed Central journal article supplement — Proc Natl Acad Sci U S A. 2021 Dec 20;119(1):e2111703119. doi: 10.1073/pnas.2111703119 (PMC8740767; doi:10.1073/pnas.2111703119), 2021-12-20
Supplement: pnas.2111703119.sapp.pdf [file pnas.2111703119.sapp.pdf]

## Supplementary Information for

### SF3B1 mutant-induced missplicing of MAP3K7 causes anemia in myelodysplastic syndromes

Yen K. Lieu<sup>1,2,\*</sup>, Zhaoqi Liu<sup>3,4,5,9,10</sup>, Abdullah M. Ali<sup>2,9</sup>, Xin Wei<sup>6,7</sup>, Alex Penson<sup>3,4</sup>, Jian Zhang<sup>1</sup>, Xiuli An<sup>6</sup>, Raul Rabadan<sup>3,4,5</sup>, Azra Raza<sup>2,8</sup>, James L. Manley<sup>1,11,\*</sup>, and Siddhartha Mukherjee<sup>2,11,\*</sup>

\*Corresponding authors: Yen K. Lieu, Siddhartha Mukherjee, James L. Manley (lead contact).

Email: [ykl2104@columbia.edu](mailto:ykl2104@columbia.edu)/[ylieu6@gmail.com](mailto:ylieu6@gmail.com), [sm3252@cumc.columbia.edu](mailto:sm3252@cumc.columbia.edu), [jlm2@columbia.edu](mailto:jlm2@columbia.edu)

#### This PDF file includes:

Supplementary text  
Figures S1 to S7 (not allowed for Brief Reports)  
Tables S1 to S2 (not allowed for Brief Reports)  
Legends for Figures S1 to S7  
SI References

#### Supplementary Information Text

#### Supplemental Materials and Methods

#### Generation of knock-in cell lines using CRISPR/Cas9 genome editing

The SF3B1 K700E and U2AF1 S34F mutations along with silent mutations were knocked into K562 cells using CRISPR/Cas9 technology as previously described (33). For true isogenic controls, only the silent mutations were knocked into K562 cells to generate independent WT control cell lines. The human SF3B1 CRISPR guide RNA was 5'-TGGATGAGCAGCAGAAAGTTcgg-3'. The single-

stranded oligodeoxynucleotides (ssODNs, Integrated DNA Technologies) for WT and K700E SF3B1 were

5'-

AATGTTGGGGCATAGTTAAACCTGTGTTTGGTTTTGTAGGTCTTGTGGATGAGCAGCAGAAAGTG  
CGCACCATCAGTGCTTTGGCCATTGCTGCCTTGGCTGAAGCAGCAACTCCTTATGGTATCGAAT-3'  
and 5'-AATGTTGGGGCATAGTTAAACCTGTGTTT

GGTTTTGTAGGTCTTGTGGATGAGCAGCAGGAAGTGCGCACCATCAGTGCTTTGGCCATTGCTGC  
CTTGGCTGAAGCAGCAACTCCTTATGGTATCGAAT-3', respectively. SF3B1 mutation knock-in was  
confirmed using PCR amplification of genomic DNA (forward primer: 5'-

GTTGATATATTGAGAGAATCTGGATG-3'; and reverse primer: 5'-AAATCAAAGGTAATTGGTGA-  
3') and DNA sequencing. The human U2AF1 CRISPR guide RNA was 5'-

AAAATTGGAGCATGTCGTCATGG-3' and the mutant ssODN was 5'-ttacagagtc aac tgt tca ttt tat ttc  
aaa att gga gca tgt cgt cat gga gac Cgg tgc tTt cgg ttg cac aat aaac cgacgttag ccaggttgt

ttgcctttttcatgtaaa ttataaaaac-3'. U2AF1 mutation knock-in was confirmed using PCR amplification of  
genomic DNA (forward primer: 5'- TGCTGCTGACATATTCCATGT-3'; and reverse primer: 5'-  
AGTCGATCACCTGCCTCACT -3') and DNA sequencing.

### **MAP3K7 expression constructs**

5' hemagglutinin (HA) tag-containing MAP3K7 forward primer (5'-  
cagtGGGCCaccATGTACCCATACGATGTTCCAGATTACGCTAGCGGCCGCATGTCTACAGCCTCT  
GCCG-3') and its reverse primer (5'-ATAggatccTCATGAAGTGCCTTGTCTGTTTC-3') were used to  
amplify MAP3K7 from pDONR223-MAP3K7 plasmid (Addgene plasmid #23693) and cloned into the  
NotI and BamHI sites of lentiviral vector pHIV-ZsGreen (Addgene plasmid #18121) to generate the  
pHIV-ZsGreen-5'HA tagged MAP3K7 construct. pLKO.1-eGFP was generated from pLKO.1-puro  
(Sigma) by replacing the coding sequence of the puromycin resistance gene with that of eGFP using  
restriction sites BamHI and KpnI (5'CGCGGATCCACCGGAGCTTACCATGGTGAGCAAGGGCGA-3';  
5'-GGGGCGGGCGTTACTTGTACAGCTCGTCCATG-3'). Short hairpin RNAs (shRNAs) for negative  
controls and for targeting mRNAs of MAP3K7 were each cloned into pLKO.1-eGFP plasmid. The

shRNA sequences were: shNegative Control #1, 5'-ccgg CAACAAGATGAAGAGCACCCctctcaacactggGGTGCTCTTCATCTTGTTGttttg-3'; shNegative Control #2, 5'-ccggTTCTCCGAACGTGTACAGTcctctcaacactgg ACGTGACACGTTCCGGAGAAttttg-3'; shMAP3K7 #1, 5'-ccgg CCTGAAACCACCAAACCTTAcctctcaacactggTAAGTTTGGTGGTTTCAGGttttg-3'; shMAP3K7 #2, 5'-ccggCATGCAACCCAAAGCGCTAcctctcaacactgg TAGCGCTTTGGGTTGCATGttttg-3'; shMAP3K7 #3, 5'-ccggGTGTTTACAGTGTTCCCAA cctctcaacactggTTGGGAACACTGTAAACACTttttg-3'; shMAP3K7 #4, 5'-ccggTGGCTTATCTTACACTGGAcctctcaacactgg TCCAGTGTAAGATAAGCCAAttttg-3'; shMAP3K7 #5, 5'-ccgg GAGGAAAGCGTTTATTGTAcctctcaacactggTACAATAAACGCTTTCCTCttttg-3'; shMAP3K7 #6, 5'-ccggCCCAATGGCTTATCTTACAcctctcaacactgg TGTAAGATAAGCCATTGGGttttg-3'. All PCR-amplified products were confirmed by DNA sequencing, and all plasmids were validated by digestion with multiple restriction enzymes and partial DNA sequencing.

### **Viral production**

For the re-expression and KD studies, lentiviral pHIV-ZsGreen encoding MAP3K7 and pLKO.1\_eGFP lentiviral vectors containing the six MAP3K7 shRNAs or negative control shRNAs were constructed as described above. Lentiviral vectors, along with the packaging plasmid PsPAX2 (Addgene #12260) and the envelope plasmid pCMV-VSV-G (Addgene #8454), were co-transfected into HEK293T cells that were cultured in Dulbecco's Modified Eagle's Medium (Gibco, cat # 11965092) supplemented with 10% FBS (VWR Seradigm, cat # 89510-186) in a 37°C, 5% CO<sub>2</sub> incubator. Viral supernatant was harvested at 48h and 72h to transduce cell lines and human CD34+ cells using standard protocols. Cells were sorted for GFP positivity before proceeding with the assays (see more details below).

### **Purification, erythroid induction culture, and transduction of human CD34+ cells**

Human CD34+ cells were purified from adult peripheral whole blood (LeukoPaks) by positive selection using microbeads magnetic cell separation system (Miltenyi Biotec, Cat # 130-100-453), according to the manufacturer's instructions. The purity of the isolated CD34+ cells was greater than

95%. CD34+ cells were induced to erythroid differentiation using three phase-culture media cocktails, containing various amount of erythropoietin, as previously described (2). Transduction of human CD34+ cells with viruses was performed using a method we previously published(3). The cells were cultured in a 37°C, 5% CO<sub>2</sub> incubator.

### **Erythroblast staging analysis**

Healthy and MDS BM aspirates were analyzed for the four erythroblast stages (proerythroblast, basophilic normoblast, polychromatophilic normoblast, and orthochromatic normoblast) using a previously published method(2). Briefly, BM aspirates were separated on a Ficoll (GE Healthcare) density gradient, and the purified mononuclear cells were incubated with CD45 microbeads (STEMCELL Technologies) for negative selection according to the manufacturer's instructions. CD45 negative cells were stained with antibodies to detect three erythroid surface markers (GPA, Integrin Alpha4, Band 3), then flow cytometric analyzed, and quantified as previously described (2).

### **Fluorescence-activated cell sorting of cultured and CD34+ cells**

Cells were washed and resuspended in PBS containing 0.5% BSA. The virally-transduced human CD34+ were sorted for GFP reporter expression on a MoFlo high-speed cell sorter (Beckman-Coulter) located at the New York Blood Center, NY. Transduced cultured cells were sorted for GFP on an Influx cell sorter (BD Biosciences) or BD FACSAriaII sorter (BD Biosciences) at Columbia University Irving Medical Center.

### **Western blot analysis**

Whole-cell lysates of cultured cells or MDS BM MNCs were prepared with standard radioimmunoprecipitation assay buffer in the presence of protease (Sigma, cOmplete) and phosphatase (Sigma, PhosSTOP) inhibitor cocktails. Protein concentration was measured using Bio-Rad Protein Assay. Protein lysates (15-25 ug) were run on Novex Tris-Glycine gels (Invitrogen) and transferred to nitrocellulose membranes (Bio-Rad), followed by immunoblotting with primary and secondary antibodies using standard methods. Bands were measured and quantified using ImageJ (NIH) or ImageQuant (Molecular Dynamics) softwares. All antibodies used were as follow: anti-

MAP3K7 (Cell Signaling, 4505S), anti-p38 MAPK (Cell Signaling, 8690T), anti-p-p38 MAPK (T180) (Cell Signaling, 4511S), anti-p-NF-kappaB p65 (Cell Signaling, 3033P), anti-GATA-1 (Cell Signaling, 3535T), anti-p-HSP27 (Cell Signaling, 9709T), anti-p-MAPKAPK-2 (MK2; T334) (Cell Signaling, 9595T), anti- $\alpha$ -Tubulin (Cell Signaling, 3007T), anti-p-SAPK/JNK (T183/Y185) (Cell Signaling, 9255S), anti-p-ERK1/2 (Bethyl, A303-608A-T), anti-K700E SF3B1 (Bethyl, custom made), anti-SF3B1 (Bethyl, A300-996A), anti-beta-Actin (Sigma, A3853), anti-GAPDH (Sigma, G9545), and anti-HA (Sigma, H3663)

### **RT-PCR and qPCR**

One microgram of RNA was used for reverse transcription using Invitrogen's SuperScript III First-Strand kit with the provided oligo-dT (ThermoFisher, cat # 18080-051). For qPCR, transcript levels were measured using SYBR Green qPCR (Applied Biosystems, cat # 4367659). Relative RNA levels in whole-cell lysates were determined by normalizing expression levels of the target genes to expression levels of GAPDH. For RT-PCR, PCR was carried out using EconoTaq PLUS GREEN 2x master mixes (Lucigen) and primers for target genes and control housekeeping genes. RT-PCR primers used are the following: SF3B1 5'-gctgtgtgcaaaagcaagaa-3' and 5'-agccaaacccttctctgt-3'; MAP3K7 5'-GTGAGATGATCGAAGCCCCT-3' and 5'-CAGCACCATGCAGCACATTA-3'. qPCR primers used are as follow: GAPDH 5'-CTGACTTCAACAGCGACACC-3' and 5'-CCCTGTTGCTGTAGCCAAAT-3'; LDB1 5'-TGTCACGCCACAAGACCTAC-3' and 5'-GGAGAGGGCGAAGGTGCTA-3'; HSPA5 5'-GAAAGAAGGTTACCCATGCAGTTG-3' and 5'-CATTTAGGCCAGCAATAGTTCCAG-3'; c-MYC 5' -CGTCTCCACACATCAGAGCACAA-3' and 5'-GCAGCAGGATAGTCCTT-3'; c-MYB 5'-GAAAGCGTCACTTGGGGAAAA-3' and 5'-TGTTTCGATTCGGGAGATAATTGG-3'; and EKLF1 5'-ATGACTTCCTCAAGTGGTGG-3' and 5'-CTCTCATCGTCCTCTTCCTC-3'.

### **siRNA transfection**

siRNA transfections of K562, TF1a, and K052 suspension cells were carried out using the Neon Transfection System (Thermo Fisher Sci) with the Neon 100uL tip kit that includes the R buffer for electroporation (Thermo Fisher Sci). One million cells were resuspended in 100uL of R buffer,

containing 1uL of 100uM siRNAs. Transfection was performed following the manufacture's protocol. Electroporated cells were immediately placed in 2mL complete media for 24h. After 24h, an additional 8mL of complete media was added to the 2mL cells for 24h. Cells were harvested for subsequent assays. For GATA1 KD, 17.5-18.5h hemin (50uM final)-pretreated K562 cells were used for electroporation. Transfected cells were immediately put into 2mL complete media containing 50uM hemin for 24h. After 24h, an additional 13mL of 50uM hemin complete media was added to the cells for 32h before cells were harvested for analysis. The siRNA sequences used are as follow: Negative Control siC1 from Sigma Universal Negative Control #1 (SIC001); Negative Control siC2 from mit.edu/sirna (GL3 #1008); Negative Control siC3 from mit.edu/sirna (siRL3 #1001); siMAP3K7#1 from Sigma, NM\_003188 SASI\_Hs01\_00234777 CCTGAAACCACCAAACCTTAdTdT; siMAP3K7#2 from Sigma, NM\_003188 SASI\_Hs01\_00234778 CATGCAACCCAAAGCGCTAdTdT; siMAP3K7#3 from Sigma, NM\_003188 SASI\_Hs02\_00335227 GTGTTTACAGTGTTCCCAAdTdT; siGATA1#1 from Sigma, NM\_002049 SASI\_Hs01\_00092060 GGAUGGUAUUCAGACUCGAdTdT; siGATA1#2 from Sigma, NM\_002049 SASI\_Hs01\_00092059 CCAAGAAGCGCCUGAUUGUdTdT.

### **Flow cytometric analysis**

Cells were washed with PBS containing 0.5% bovine serum albumin (BSA). After blocking with 0.4% human AB serum for 10 minutes on ice, cells were stained with fluorochrome-conjugated antibodies in PBS/0.5% BSA for 15 minutes at 4°C. Cells were washed once with PBS/0.5% BSA before analysis. When Annexin V analysis was performed, cells were washed with 1x Annexin V binding buffer (Biolegend, Cat #422201) instead. Cells were subsequently stained with Fluorochrome-conjugated Annexin V in 1x Annexin V binding buffer according to manufacturer's protocol. Cells were immediately analyzed on a FACSCalibur (Becton Dickinson) or LSRFortessa (BD Biosciences) cell analyzer. FACS files were analyzed using FlowJo software (FlowJo, LLC). FACS antibodies used were the following: anti-human CD235a (GPA) PE (Biolegend, 349106), anti-Annexin V APC (Biolegend, 640941), anti-CD45 APC-Cy7 (Biolegend, 304014), anti-human CD71 (Biolegend, 151204), anti-Annexin V Pacific Blue (Biolegend, 640917), anti-Ki67 AF488 (Biolegend, 151204), 7AAD (BD

Pharmingen, 559925), anti-alpha4 integrin/CD49d PE (Miltenyi Biotec, 130-118-548), anti-CD235a-PC7 (PE-Cy7) (Beckman Coulter, A71564), and anti-Band 3 APC (made by Xiuli An's lab<sup>26</sup>).

### **Gene ontology analysis**

To determine gene ontology pathways that could potentially be affected by abnormal splicing in *SF3B1* mutant cells. To this end, we first performed standard enrichment analysis using GO David online tools. The input is a list of genes associated with significant aberrant splicing events between mutant and wild-type by satisfying: 1) significantly more frequently used in mutant with  $q$ -value  $<0.05$ ; and 2) associated with a distance  $<50$  bp upstream of the canonical 3'ss.

### **RNAseq coverage plots of cryptic 3'ss**

We used Integrative Genomics Viewer (IGV) (1) to visualize usage of cryptic 3'ss of gene junctions. For different *SF3B1* mutation comparisons, we downloaded MDS RNASeq data from NCBI Sequence Read Archive (GSE85712 (2); GSE63569 (3)).

### **Intracellular Ki67 staining**

Day 3- hemin-treated cells were washed and stained with GPA-PE surface marker as described above. Cells were then washed, fixed and stained for intracellular Ki67 following BD Pharmingen's procedure for FITC BrdU Flow Kit with two modifications: DNase treatment step was omitted and Ki67-AlexaFluor488 (Biolegend) was used instead of anti-BrdU FITC.

### **Supplemental Figures and Legends**

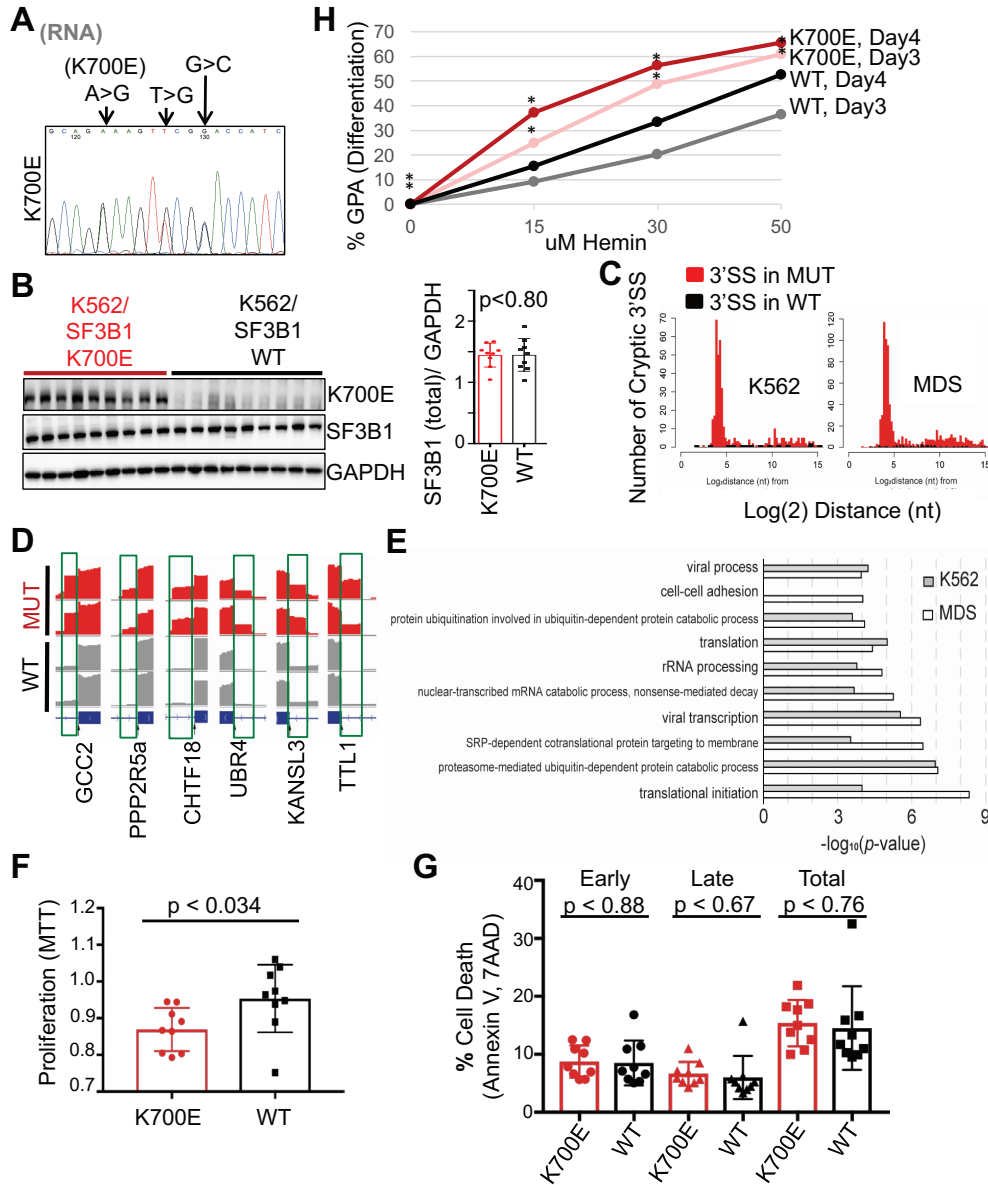

**Fig. S1.** Characteristics of K562/SF3B1 K700E and WT CRISPR clones (A) DNA chromatogram of RT-PCR products from a representative K562/SF3B1 mutant clone, demonstrating the stable expression of K700E and two silent mutations in *SF3B1* mRNA. (B) Left panel, representative WB images showing expression of total SF3B1, K700E mutant SF3B1, and loading control GAPDH in the nine independent K700E mutant and nine independent WT K562/SF3B1 clones. Right panel, bar graph displaying the results of ImageJ-quantified, GAPDH-normalized total SF3B1 band intensity and p-value from t-test. (C) Image showing  $\text{Log}_2$  distance in nucleotides from cryptic 3'ss to corresponding canonical 3'ss from K562 cells (left panel) and MDS patients (right panel). (D) RNA-seq coverage plots of some examples of cryptic 3'ss-containing transcripts in two K562/SF3B1 K700E and two WT clones: (from left to right) *GCC2*, *PPP2R5a*, *CHTF18*, *UBR4*, *KANSL3* and *TTL1*. (E) Image displaying comparison of the top 10 enriched GO pathways determined from misspliced transcripts from SF3B1 mutant K562 cells (grey bar) and SF3B1 mutant MDS patients (white bar). Representative bar graphs quantifying (F) the relative proliferative capacity as measured by MTT assay ( $n=3$  independent experiments) and (G) cell death as measured by FACS using AnnexinV and 7AAD ( $n=3$  independent experiments) in SF3B1 mutant and WT K562 cells under normal growth conditions. p-values from t-tests are shown. (H) Bar graph showing the normalized percent GPA of Fig. 1E to 0  $\mu\text{M}$  hemin. \*,  $p < 0.05$ .



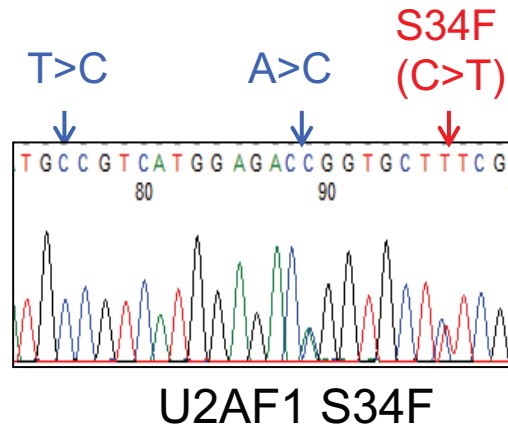

**Fig. S2.** Introduction of the hotspot *U2AF1* S34F mutation into K562 cells using CRISPR/Cas9. DNA chromatogram of representative K562/*U2AF1* mutant clone, showing hotspot S34F and two silent mutations in the *U2AF1* gene by CRISPR.

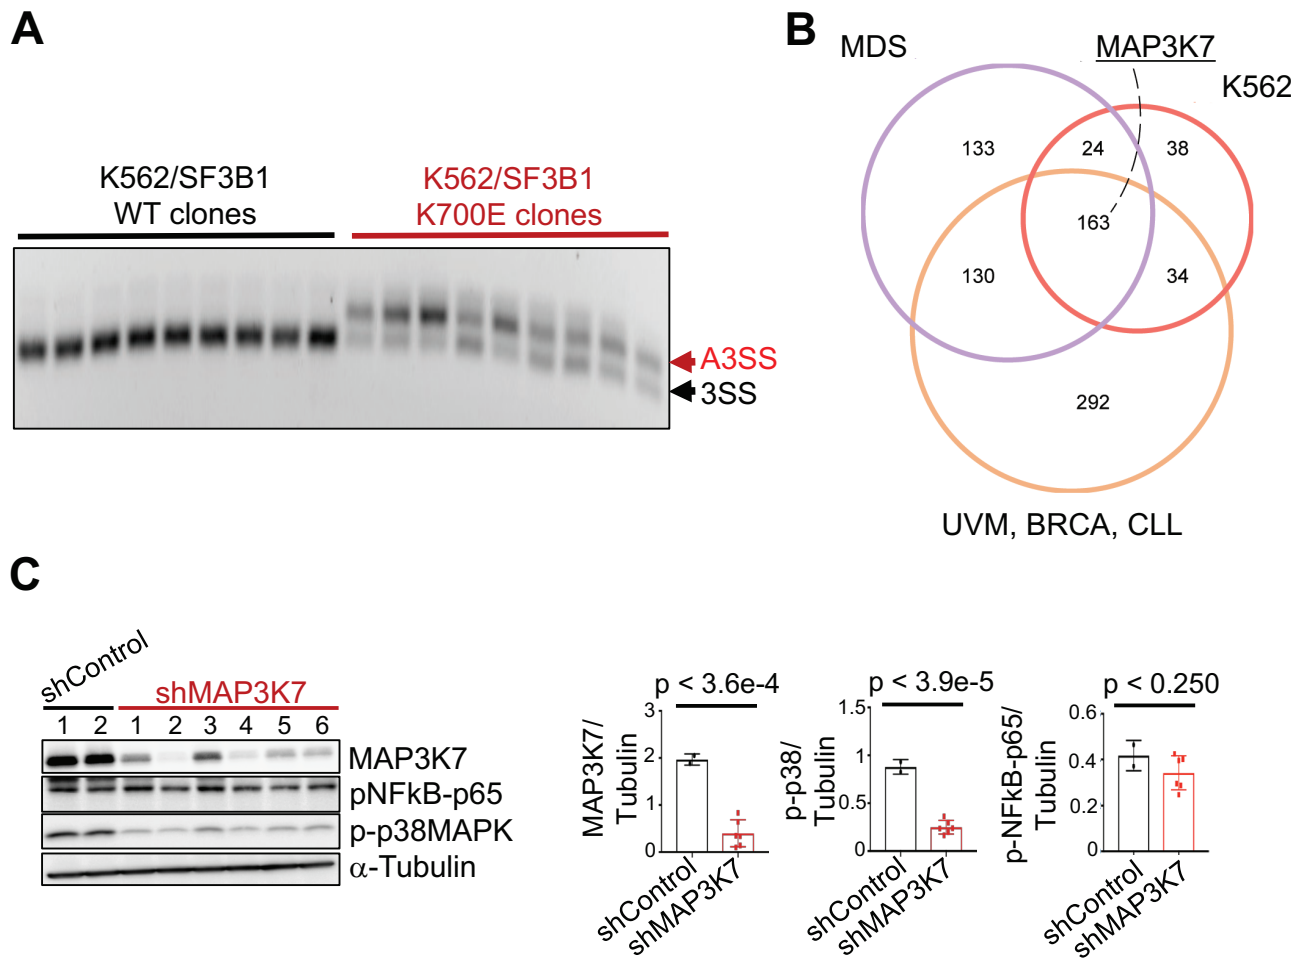

**Fig. S3.** *MAP3K7* is misspliced in mutant *SF3B1* cells from K562, MDS, and other cancers. (A) Image of RT-PCR gel showing 3'ss usage in mutant K562/SF3B1 cells. (B) Venn diagram showing the numbers of differentially spliced transcripts in mutant *SF3B1* samples from MDS, K562/SF3B1 and other cancers: uveal melanoma (UVM), breast carcinoma (BRCA), and chronic lymphocytic leukemia (CLL) (gene list of other cancers (4)). (C) Images (left) of representative WB analysis of GFP-sorted, shRNA-mediated *MAP3K7* KD (two different negative control and six different *MAP3K7* shRNAs) in parental K562 cells, and bar graphs (right) displaying the results of ImageJ-quantified,  $\alpha$ -Tubulin-normalized phospho-NFkBp65, *MAP3K7*, and p-p38 band intensities in WB analysis are shown. p-values from t-tests are labelled on all bar graphs. n= 2 independent experiments.

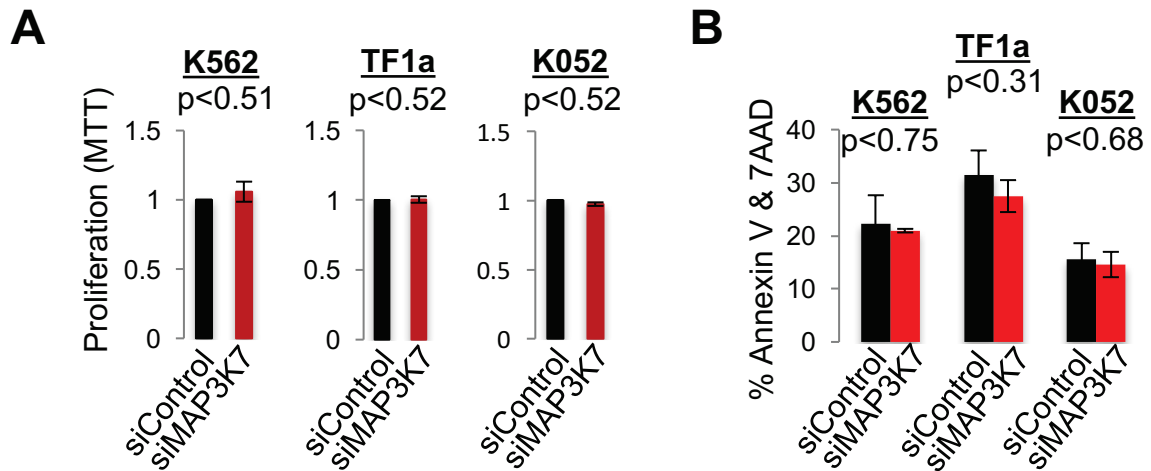

**Fig. S4.** Knockdown of *MAP3K7* in K562, TF1a, and K052 cells has no effects on proliferation and cell death under normal growth conditions but leads to increased erythroid development and erythroid cell death. Bar graphs quantifying (A) proliferation via MTT assay and (B) cell death via AnnexinV and 7AAD by FACS analysis of K562, TF1a, and K052 cells at 48h post-transfection with control (siControl #1) or *MAP3K7* (siMAP3K7 #2) siRNAs under normal growth conditions. p-values from t-tests are shown. n=3 independent experiments.

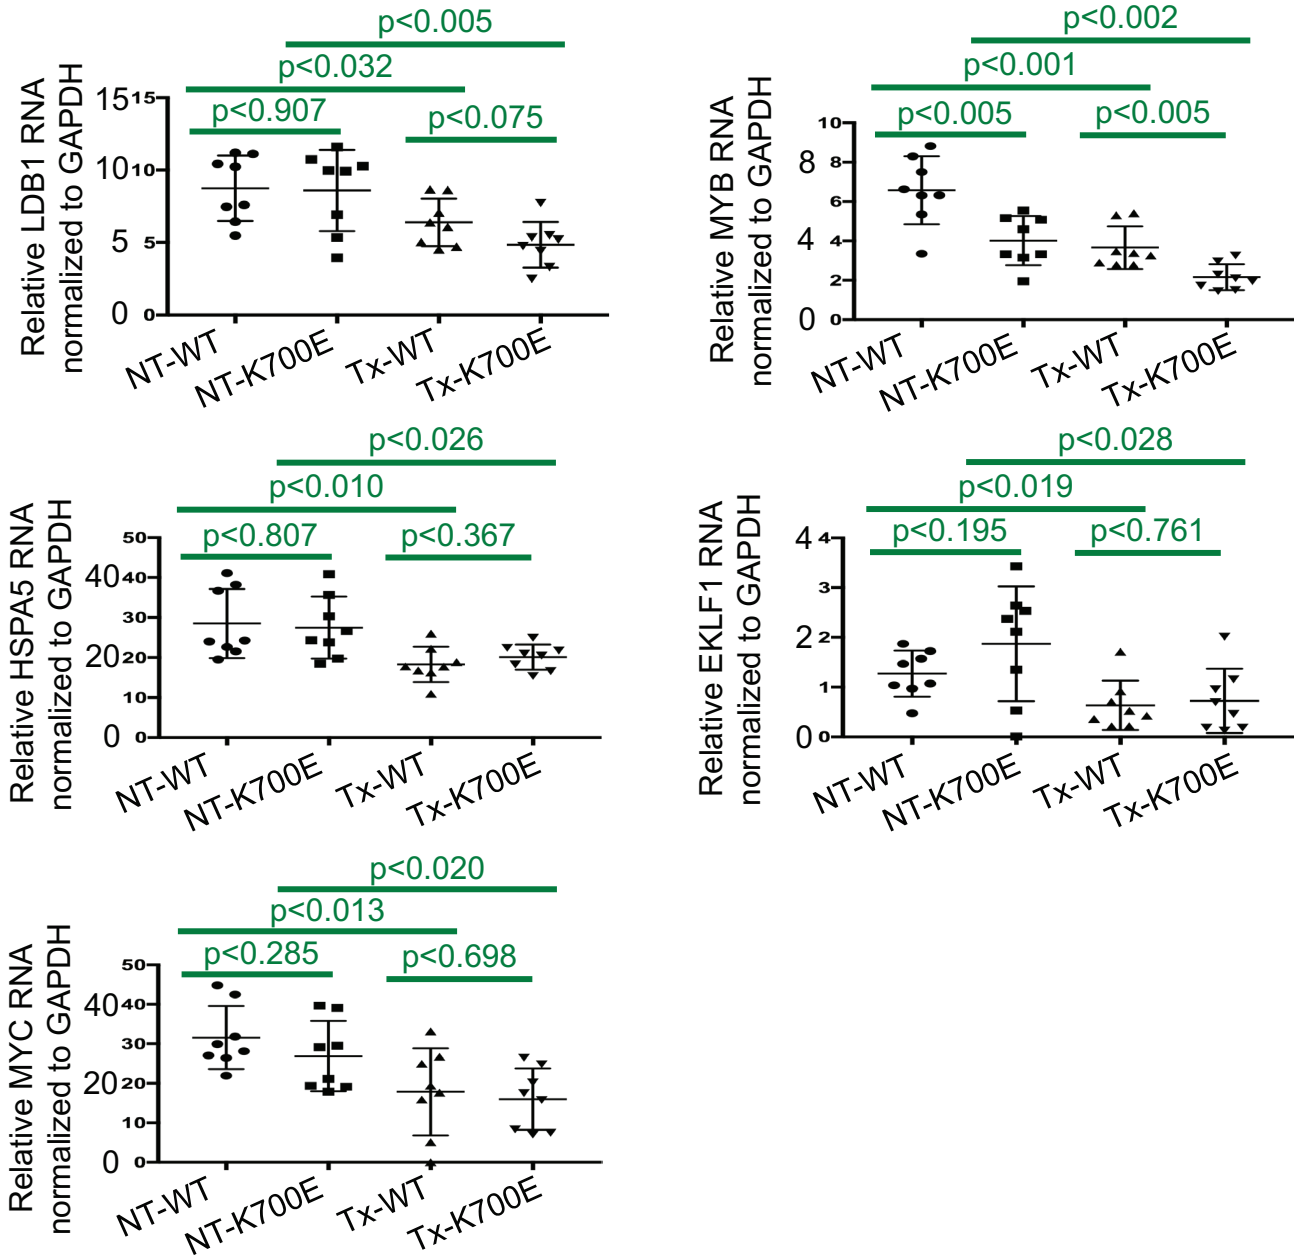

**Fig. S5.** Expression of several major transcription factors in erythroid differentiation of K562/SF3B1 cells. qPCR showing expression of several transcription factors (*LDB1*, *MYB*, *HSPA5*, *EKL1*, *MYC*) that are known to play a role in erythroid differentiation. p-values from t-tests are shown.

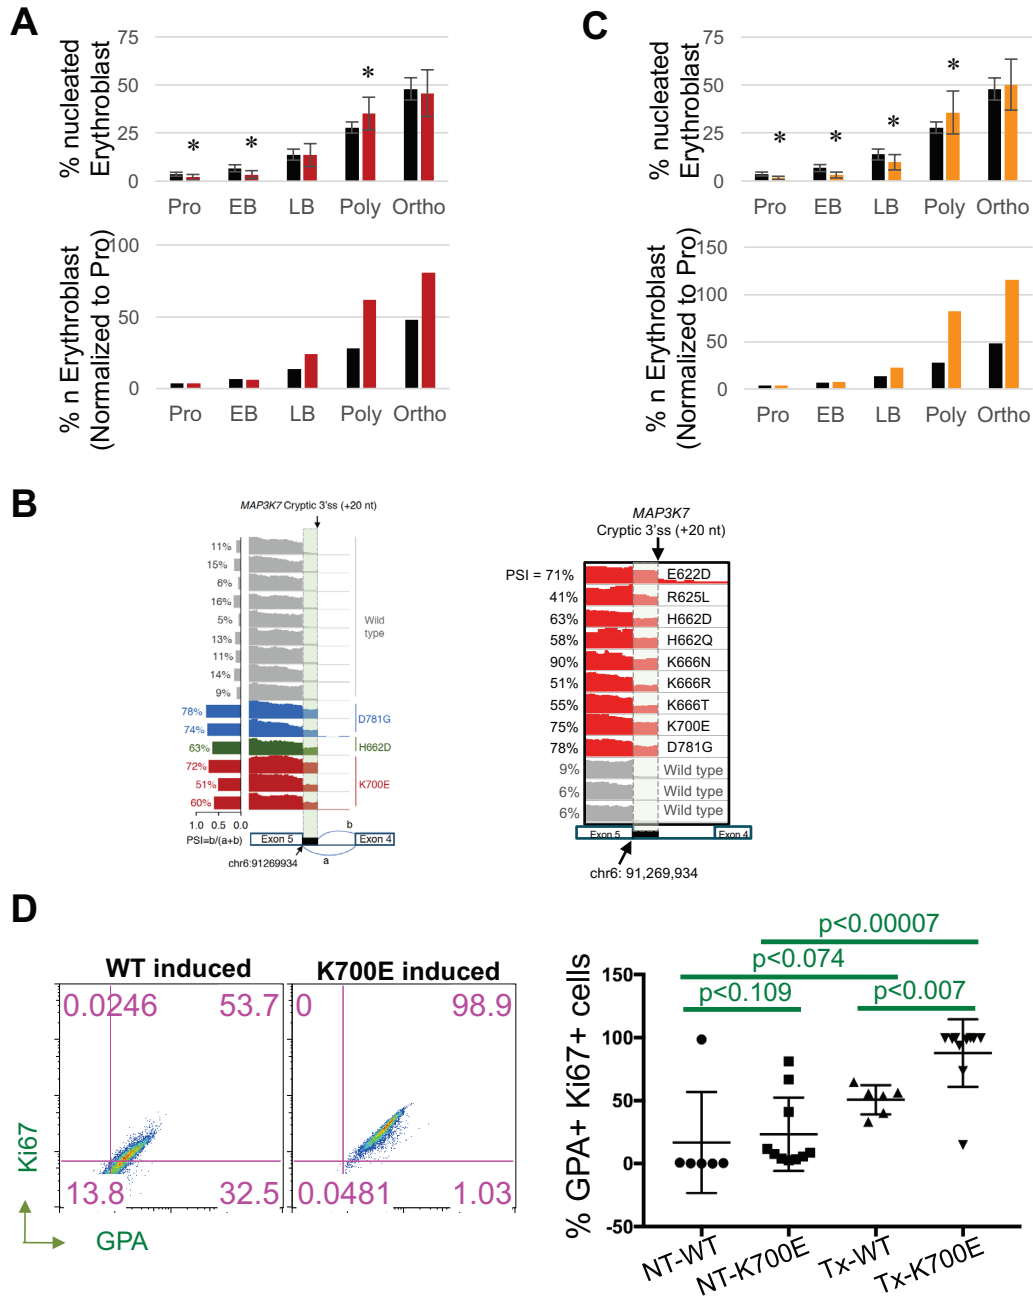

**Fig. S6.** Other MDS SF3B1 mutations, besides K700E, also cause *MAP3K7* missplicing and accelerated erythroid differentiation. Re-plotted MDS erythroblast profile data (5) using only normal healthy samples ( $n=16$ ) and MDS samples (A) with K700E ( $n=15$ ) and (C) with non-K700E SF3B1 mutations ( $n=14$ ). The percentages of nucleated erythroid cells in each erythroblast stage are illustrated in the bar graphs. \*,  $p < 0.05$ . Normalized-to-proerythroblast (Pro)-staged bar graphs are also shown for comparison. Pro, proerythroblasts; EB, early basophilic erythroblasts; LB, late basophilic erythroblasts; Poly, polychromatic erythroblasts; and Ortho, orthochromatic erythroblasts. (B) RNA-seq coverage plots of *MAP3K7* cryptic 3'ss in MDS patients with different SF3B1 hotspot mutations (MDS RNAseq data downloaded (left panel) (6) and (right panel) (2, 3)) and with no SF3B1 mutations (wild-type). (C) Expression of proliferative marker Ki67 in mutant and WT K562/SF3B1 erythroid cells. FACS analysis of Ki67 vs. GPA expression in representative 50  $\mu$ M hemin-induced day 3 K700E and WT cells. Results of multiple K700E and WT clones are summarized graphically.  $p$ -values from t-tests are shown.  $n=2$  independent experiments.

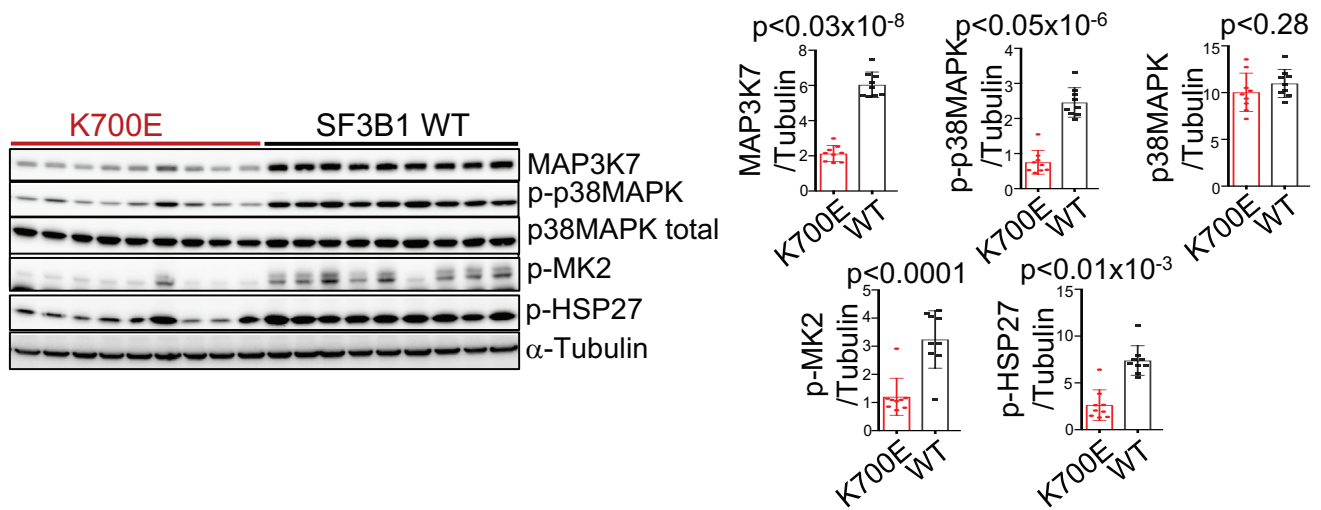

**Fig. S7.** Mutant SF3B1 cells display increased proliferative capacity and deactivation of p38 MAPK downstream effectors, MAPKAPK2 (MK2) and HSP27. (A) Representative WB images showing expression of p-MK2 and p-HSP27 in mutant and WT K562/SF3B1 clones. Bar graphs display the results of ImageJ-quantified,  $\alpha$ -Tubulin-normalized protein band intensities and p-values from t-tests. n=3 independent experiments.

Table S1. Cryptic 3' Splice Sites Differentially Used by Mutant 700E vs WT SF3B1 K562 Cells

| statistics |          |        |       |                           | inclusion_level              |                               |                             | Gene       | Locati                      |       |
|------------|----------|--------|-------|---------------------------|------------------------------|-------------------------------|-----------------------------|------------|-----------------------------|-------|
| pvalue     | padj     | MUT    | WT    | log2fold<br>_MUT_<br>_WT_ | inclusion<br>_level_<br>_WT_ | inclusion<br>_level_<br>_MUT_ | inclu_diff<br>_WT-<br>_MUT_ | Genename   | transcripts                 | chrom |
| 1.43E-06   | 0.00041  | 5.146  | 0.182 | 4.824                     | 0.000                        | 0.900                         | -0.900                      | LONP1      | chr19:5717646-5719714:-     | chr19 |
| 2.68E-13   | 2.88E-10 | 11.734 | 0.116 | 6.657                     | 0.000                        | 0.806                         | -0.806                      | PFDN5      | chr12:53689726-53691607:+   | chr12 |
| 6.13E-05   | 0.00956  | 4.974  | 1.100 | 2.178                     | 0.050                        | 0.780                         | -0.730                      | ORA12      | chr7:102074109-102076648:+  | chr7  |
| 0.0002     | 0.02623  | 4.226  | 0.169 | 4.644                     | 0.000                        | 0.721                         | -0.721                      | CROCCP3    | chr1:16803043-16803424:-    | chr1  |
| 2.66E-05   | 0.00481  | 8.588  | 2.581 | 1.734                     | 0.069                        | 0.770                         | -0.701                      | IDUA       | chr4:995352-995438:+        | chr4  |
| 1.11E-05   | 0.00233  | 4.761  | 0.180 | 4.728                     | 0.000                        | 0.697                         | -0.697                      | NDUFB8     | chr10:102276735-102286155:- | chr10 |
| 1.45E-20   | 3.33E-17 | 17.298 | 4.998 | 1.791                     | 0.076                        | 0.773                         | -0.697                      | MAP3K7     | chr6:91269954-91271340:-    | chr6  |
| 3.09E-18   | 6.14E-15 | 9.417  | 0.159 | 5.888                     | 0.000                        | 0.688                         | -0.688                      | SEPSECS    | chr4:25158620-25160574:-    | chr4  |
| 1.95E-21   | 5.00E-18 | 11.339 | 1.871 | 2.599                     | 0.146                        | 0.811                         | -0.665                      | CHTF18     | chr16:843275-844033:+       | chr16 |
| 0.0003     | 0.03114  | 5.042  | 1.470 | 1.779                     | 0.043                        | 0.708                         | -0.665                      | DZIP3      | chr3:108403189-108405274:+  | chr3  |
| 1.49E-07   | 5.50E-05 | 5.615  | 0.130 | 5.429                     | 0.000                        | 0.654                         | -0.654                      | EFTUD2     | chr17:42929951-42930884:-   | chr17 |
| 2.18E-05   | 0.00415  | 6.138  | 2.172 | 1.499                     | 0.148                        | 0.795                         | -0.647                      | ZNF41      | chrX:47315814-47326808:-    | chrX  |
| 6.03E-06   | 0.00139  | 5.003  | 0.121 | 5.371                     | 0.000                        | 0.635                         | -0.635                      | ADGRV1     | chr5:89977272-89979392:+    | chr5  |
| 6.94E-08   | 2.78E-05 | 7.800  | 1.606 | 2.280                     | 0.044                        | 0.673                         | -0.629                      | HERC2P2    | chr15:23283431-23285704:-   | chr15 |
| 4.90E-12   | 4.43E-09 | 7.412  | 0.162 | 5.514                     | 0.000                        | 0.616                         | -0.616                      | USP39      | chr2:85848703-85850728:+    | chr2  |
| 7.59E-05   | 0.01146  | 8.671  | 3.064 | 1.501                     | 0.129                        | 0.740                         | -0.611                      | CCDC66     | chr3:56649301-56649931:+    | chr3  |
| 6.29E-18   | 1.20E-14 | 11.441 | 2.152 | 2.410                     | 0.081                        | 0.688                         | -0.607                      | HIGD1A     | chr3:42835782-42845927:-    | chr3  |
| 1.11E-07   | 4.18E-05 | 7.339  | 1.969 | 1.898                     | 0.044                        | 0.646                         | -0.602                      | SH2D2A     | chr1:156785905-156786466:-  | chr1  |
| 1.92E-15   | 2.83E-12 | 9.306  | 0.134 | 6.118                     | 0.000                        | 0.590                         | -0.590                      | KANSL3     | chr2:97285514-97297048:-    | chr2  |
| 4.37E-27   | 1.81E-23 | 13.963 | 3.084 | 2.179                     | 0.036                        | 0.618                         | -0.582                      | VPS9D1-AS1 | chr16:89778631-89779081:+   | chr16 |
| 9.89E-15   | 1.34E-11 | 9.374  | 1.553 | 2.593                     | 0.019                        | 0.593                         | -0.574                      | GCC2       | chr2:109102365-109102954:+  | chr2  |
| 5.44E-14   | 6.59E-11 | 8.090  | 0.169 | 5.578                     | 0.000                        | 0.510                         | -0.510                      | MAN2A1     | chr5:109181708-109183328:+  | chr5  |
| 7.00E-90   | 2.09E-85 | 24.995 | 4.228 | 2.564                     | 0.018                        | 0.525                         | -0.507                      | MYL4       | chr17:45300424-45300861:+   | chr17 |
| 1.56E-07   | 5.71E-05 | 5.661  | 0.121 | 5.549                     | 0.000                        | 0.505                         | -0.505                      | ADGRV1     | chr5:90000306-90001195:+    | chr5  |
| 2.42E-05   | 0.00445  | 5.293  | 1.134 | 2.223                     | 0.025                        | 0.529                         | -0.504                      | CASD1      | chr7:94157563-94162500:+    | chr7  |
| 9.48E-20   | 2.11E-16 | 10.317 | 0.870 | 3.567                     | 0.005                        | 0.489                         | -0.485                      | TTI1       | chr20:36631196-36634598:-   | chr20 |
| 1.04E-28   | 4.94E-25 | 15.293 | 2.245 | 2.768                     | 0.009                        | 0.493                         | -0.484                      | DPH5       | chr1:101458311-101460665:-  | chr1  |
| 1.98E-10   | 1.31E-07 | 8.883  | 1.051 | 3.079                     | 0.008                        | 0.480                         | -0.473                      | ECT2       | chr3:172479474-172480187:+  | chr3  |
| 3.79E-08   | 1.62E-05 | 6.029  | 0.174 | 5.117                     | 0.000                        | 0.463                         | -0.463                      | CEP135     | chr4:56874549-56875878:+    | chr4  |
| 0.0001     | 0.01768  | 6.357  | 2.716 | 1.227                     | 0.199                        | 0.635                         | -0.437                      | SOCS2-AS1  | chr12:93939175-93960519:-   | chr12 |
| 0.0003     | 0.03667  | 5.401  | 1.044 | 2.372                     | 0.012                        | 0.442                         | -0.430                      | ZNF445     | chr3:44492077-44492359:-    | chr3  |
| 1.11E-08   | 5.36E-06 | 6.853  | 1.115 | 2.620                     | 0.013                        | 0.427                         | -0.414                      | SMURF2     | chr17:62574713-62576906:-   | chr17 |
| 3.52E-10   | 2.25E-07 | 7.657  | 0.135 | 5.831                     | 0.000                        | 0.404                         | -0.404                      | TPP2       | chr13:103297360-103298629:+ | chr13 |
| 3.10E-17   | 5.64E-14 | 9.818  | 1.331 | 2.883                     | 0.006                        | 0.404                         | -0.398                      | VARS2      | chr6:30884737-30884871:+    | chr6  |
| 6.93E-12   | 5.90E-09 | 7.410  | 0.155 | 5.579                     | 0.000                        | 0.385                         | -0.385                      | NDRG3      | chr20:35282127-35284762:-   | chr20 |
| 3.10E-08   | 1.34E-05 | 6.208  | 0.138 | 5.497                     | 0.000                        | 0.381                         | -0.381                      | UQCC1      | chr20:33934265-33934966:-   | chr20 |
| 1.75E-43   | 1.86E-39 | 19.202 | 4.096 | 2.229                     | 0.017                        | 0.398                         | -0.380                      | OXA1L      | chr14:23237381-23238985:+   | chr14 |
| 1.30E-09   | 7.29E-07 | 7.908  | 1.704 | 2.215                     | 0.024                        | 0.404                         | -0.379                      | CCDC74A    | chr2:132288401-132289210:+  | chr2  |
| 6.40E-07   | 0.0002   | 5.620  | 0.134 | 5.391                     | 0.000                        | 0.359                         | -0.359                      | TRMT2A     | chr22:20101111-20101208:-   | chr22 |
| 8.04E-11   | 5.73E-08 | 9.556  | 2.872 | 1.734                     | 0.017                        | 0.361                         | -0.344                      | CFH        | chr1:196694428-196695585:+  | chr1  |

|          |          |        |       |       |       |       |        |          |                            |       |
|----------|----------|--------|-------|-------|-------|-------|--------|----------|----------------------------|-------|
| 8.88E-08 | 3.42E-05 | 5.855  | 0.129 | 5.507 | 0.000 | 0.338 | -0.338 | RNF38    | chr9:36351217-36352738:-   | chr9  |
| 1.19E-09 | 6.82E-07 | 6.616  | 0.189 | 5.128 | 0.000 | 0.336 | -0.336 | DIP2A    | chr21:47970658-47971529:+  | chr21 |
| 2.56E-06 | 0.00068  | 6.888  | 2.709 | 1.346 | 0.058 | 0.384 | -0.326 | FAM188B  | chr7:30811173-30818033:+   | chr7  |
| 0.0002   | 0.0204   | 4.976  | 1.146 | 2.118 | 0.013 | 0.338 | -0.325 | PLXND1   | chr3:129284873-129285369:- | chr3  |
| 1.75E-26 | 6.85E-23 | 12.050 | 0.907 | 3.732 | 0.002 | 0.319 | -0.317 | SAFB2    | chr19:5595522-5598803:-    | chr19 |
| 8.22E-06 | 0.00179  | 8.458  | 3.923 | 1.108 | 0.063 | 0.380 | -0.317 | DLG1     | chr3:196792336-196792578:- | chr3  |
| 1.64E-06 | 0.00046  | 14.022 | 9.359 | 0.583 | 0.304 | 0.620 | -0.316 | STARD8   | chrX:67936274-67937041:+   | chrX  |
| 2.85E-29 | 1.42E-25 | 17.543 | 6.232 | 1.493 | 0.050 | 0.355 | -0.305 | HINT2    | chr9:35813154-35813262:-   | chr9  |
| 1.68E-11 | 1.34E-08 | 7.361  | 0.128 | 5.847 | 0.000 | 0.303 | -0.303 | IQGAP3   | chr1:156532467-156532925:- | chr1  |
| 2.15E-09 | 1.18E-06 | 6.898  | 0.157 | 5.457 | 0.000 | 0.299 | -0.299 | NFYA     | chr6:41040824-41046743:+   | chr6  |
| 9.10E-25 | 3.08E-21 | 12.264 | 2.136 | 2.521 | 0.008 | 0.302 | -0.294 | FASTKD1  | chr2:170388019-170393736:- | chr2  |
| 1.04E-10 | 7.23E-08 | 8.967  | 2.640 | 1.764 | 0.026 | 0.318 | -0.292 | RWDD4    | chr4:184577128-184580081:- | chr4  |
| 9.61E-06 | 0.00206  | 4.966  | 0.138 | 5.170 | 0.000 | 0.286 | -0.286 | UQCC1    | chr20:33934241-33934966:-  | chr20 |
| 2.63E-06 | 0.00069  | 6.057  | 1.206 | 2.328 | 0.007 | 0.291 | -0.284 | CCDC74A  | chr2:132288401-132289224:+ | chr2  |
| 1.70E-15 | 2.53E-12 | 9.853  | 1.798 | 2.454 | 0.010 | 0.289 | -0.279 | COL23A1  | chr5:177684584-177686721:- | chr5  |
| 4.98E-12 | 4.47E-09 | 7.690  | 0.174 | 5.469 | 0.000 | 0.279 | -0.279 | SETD4    | chr21:37416268-37417879:-  | chr21 |
| 4.89E-06 | 0.00117  | 5.791  | 1.316 | 2.138 | 0.012 | 0.290 | -0.278 | LIG3     | chr17:33319712-33321272:+  | chr17 |
| 1.29E-06 | 0.00038  | 5.137  | 0.112 | 5.518 | 0.000 | 0.273 | -0.273 | MAP3K4   | chr6:161518209-161519291:+ | chr6  |
| 6.47E-06 | 0.00148  | 5.736  | 1.384 | 2.051 | 0.017 | 0.288 | -0.271 | NRSN2    | chr20:330008-330259:+      | chr20 |
| 6.00E-06 | 0.00139  | 4.879  | 0.164 | 4.892 | 0.000 | 0.269 | -0.269 | ZFAND5   | chr9:74978548-74979611:-   | chr9  |
| 3.20E-05 | 0.00565  | 4.878  | 0.159 | 4.937 | 0.000 | 0.263 | -0.263 | RABGAP1  | chr9:125759641-125760854:+ | chr9  |
| 1.71E-13 | 1.89E-10 | 9.243  | 1.478 | 2.645 | 0.009 | 0.265 | -0.256 | TOR1AIP2 | chr1:179835005-179846373:- | chr1  |
| 1.18E-07 | 4.43E-05 | 7.014  | 0.965 | 2.861 | 0.005 | 0.252 | -0.247 | EML3     | chr11:62376299-62376433:-  | chr11 |
| 3.19E-09 | 1.70E-06 | 6.350  | 0.139 | 5.516 | 0.000 | 0.245 | -0.245 | NF1      | chr17:29587534-29588714:+  | chr17 |
| 3.06E-05 | 0.00545  | 5.976  | 1.782 | 1.746 | 0.018 | 0.252 | -0.234 | HTT      | chr4:3142384-3144471:+     | chr4  |
| 1.70E-05 | 0.00338  | 7.074  | 1.545 | 2.195 | 0.011 | 0.239 | -0.228 | TRIM37   | chr17:57148330-57153007:-  | chr17 |
| 5.96E-11 | 4.35E-08 | 8.466  | 1.893 | 2.161 | 0.012 | 0.238 | -0.226 | UBXN2A   | chr2:24207702-24222524:+   | chr2  |
| 9.63E-10 | 5.67E-07 | 6.563  | 0.165 | 5.313 | 0.000 | 0.225 | -0.225 | CDC7     | chr1:91966506-91967193:+   | chr1  |
| 7.42E-07 | 0.00023  | 5.402  | 0.186 | 4.859 | 0.000 | 0.224 | -0.224 | ZFYVE27  | chr10:99502922-99504468:+  | chr10 |
| 2.41E-08 | 1.07E-05 | 7.957  | 2.430 | 1.711 | 0.015 | 0.238 | -0.223 | PPP2R5A  | chr1:212515623-212519131:+ | chr1  |
| 5.10E-08 | 2.12E-05 | 9.201  | 3.910 | 1.235 | 0.049 | 0.272 | -0.223 | UBR4     | chr1:19480449-19481411:-   | chr1  |
| 9.38E-11 | 6.59E-08 | 10.473 | 3.963 | 1.402 | 0.035 | 0.257 | -0.221 | RNF2     | chr1:185056773-185060696:+ | chr1  |
| 5.72E-05 | 0.00905  | 4.407  | 0.143 | 4.949 | 0.000 | 0.216 | -0.216 | FAM126B  | chr2:201853164-201857003:- | chr2  |
| 2.23E-05 | 0.00422  | 4.686  | 0.212 | 4.469 | 0.000 | 0.215 | -0.215 | CBY1     | chr22:39064138-39066874:+  | chr22 |
| 1.39E-20 | 3.23E-17 | 15.590 | 1.791 | 3.122 | 0.002 | 0.214 | -0.211 | NET1     | chr10:5497082-5498027:+    | chr10 |
| 0.0002   | 0.02087  | 4.290  | 0.175 | 4.619 | 0.000 | 0.211 | -0.211 | IL17RC   | chr3:9960294-9962150:+     | chr3  |
| 0.0004   | 0.03957  | 5.795  | 2.289 | 1.340 | 0.038 | 0.248 | -0.210 | DHX35    | chr20:37635000-37638902:+  | chr20 |
| 5.11E-33 | 3.31E-29 | 17.486 | 5.982 | 1.547 | 0.023 | 0.230 | -0.208 | PRPF38A  | chr1:52880320-52880412:+   | chr1  |
| 4.59E-06 | 0.00111  | 8.483  | 4.097 | 1.050 | 0.062 | 0.267 | -0.205 | TRNT1    | chr3:3186395-3188099:+     | chr3  |
| 0.0005   | 0.04959  | 5.433  | 2.047 | 1.408 | 0.026 | 0.227 | -0.201 | DHX35    | chr20:37662961-37667121:+  | chr20 |
| 9.84E-08 | 3.76E-05 | 6.126  | 0.129 | 5.571 | 0.000 | 0.200 | -0.200 | KPNA1    | chr3:122152653-122156016:- | chr3  |
| 1.06E-07 | 4.02E-05 | 8.678  | 3.411 | 1.347 | 0.030 | 0.227 | -0.198 | KEL      | chr7:142651631-142654913:- | chr7  |
| 5.60E-05 | 0.00891  | 5.542  | 0.191 | 4.861 | 0.000 | 0.197 | -0.197 | SCLT1    | chr4:129886490-129891532:- | chr4  |
| 1.80E-10 | 1.21E-07 | 7.691  | 1.406 | 2.452 | 0.006 | 0.200 | -0.195 | GTF2I    | chr7:74131271-74133179:+   | chr7  |
| 3.72E-16 | 6.09E-13 | 13.092 | 0.178 | 6.203 | 0.000 | 0.194 | -0.194 | DGCR2    | chr22:19044700-19050714:-  | chr22 |
| 0.0003   | 0.02996  | 4.819  | 1.013 | 2.251 | 0.012 | 0.205 | -0.193 | BIRC6    | chr2:32614012-32617091:+   | chr2  |



|          |          |        |       |       |       |       |        |           |                             |       |
|----------|----------|--------|-------|-------|-------|-------|--------|-----------|-----------------------------|-------|
| 0.0002   | 0.02847  | 7.445  | 3.769 | 0.982 | 0.099 | 0.286 | -0.187 | RGL2      | chr6:33261713-33261810:-    | chr6  |
| 1.17E-08 | 5.55E-06 | 7.899  | 1.041 | 2.923 | 0.003 | 0.188 | -0.185 | STIM1     | chr11:4104213-4104471:+     | chr11 |
| 1.87E-10 | 1.25E-07 | 7.740  | 1.273 | 2.604 | 0.005 | 0.188 | -0.184 | RDX       | chr11:110128653-110128830:- | chr11 |
| 1.06E-28 | 4.94E-25 | 11.769 | 0.156 | 6.233 | 0.000 | 0.183 | -0.183 | TPR       | chr1:186324918-186325417:-  | chr1  |
| 9.66E-06 | 0.00207  | 4.737  | 0.157 | 4.919 | 0.000 | 0.179 | -0.179 | PRPF38B   | chr1:109235490-109236193:+  | chr1  |
| 0.0001   | 0.0168   | 4.671  | 0.120 | 5.280 | 0.000 | 0.174 | -0.174 | PFDN5     | chr12:53690336-53691607:+   | chr12 |
| 7.17E-07 | 0.00023  | 5.367  | 0.132 | 5.344 | 0.000 | 0.171 | -0.171 | FKBP15    | chr9:115934003-115935732:-  | chr9  |
| 1.16E-06 | 0.00034  | 6.532  | 1.767 | 1.886 | 0.019 | 0.179 | -0.160 | ACD       | chr16:67692736-67692830:-   | chr16 |
| 3.33E-09 | 1.76E-06 | 6.865  | 0.994 | 2.788 | 0.002 | 0.157 | -0.155 | SYVN1     | chr11:64900741-64900940:-   | chr11 |
| 9.26E-12 | 7.66E-09 | 7.654  | 0.212 | 5.172 | 0.000 | 0.154 | -0.154 | RAB4A     | chr1:229407118-229422214:+  | chr1  |
| 1.01E-05 | 0.00216  | 6.865  | 2.519 | 1.447 | 0.071 | 0.220 | -0.149 | AK2       | chr1:33477744-33478807:-    | chr1  |
| 1.09E-05 | 0.00228  | 6.231  | 1.904 | 1.711 | 0.016 | 0.164 | -0.149 | KIAA0319L | chr1:35917393-35919157:-    | chr1  |
| 2.85E-06 | 0.00074  | 7.500  | 2.980 | 1.331 | 0.024 | 0.170 | -0.146 | ATF1      | chr12:51174022-51189680:+   | chr12 |
| 4.90E-06 | 0.00117  | 4.911  | 0.148 | 5.048 | 0.000 | 0.144 | -0.144 | SOS1      | chr2:39285969-39294768:-    | chr2  |
| 0.0001   | 0.01866  | 4.320  | 0.198 | 4.446 | 0.000 | 0.142 | -0.142 | DMXL1     | chr5:118454700-118456645:+  | chr5  |
| 4.62E-11 | 3.44E-08 | 7.240  | 0.165 | 5.460 | 0.000 | 0.141 | -0.141 | COL23A1   | chr5:177669415-177672942:-  | chr5  |
| 1.72E-07 | 6.22E-05 | 6.809  | 0.199 | 5.099 | 0.000 | 0.140 | -0.140 | TTK       | chr6:80750421-80751814:+    | chr6  |
| 2.09E-16 | 3.57E-13 | 9.144  | 0.922 | 3.309 | 0.001 | 0.138 | -0.137 | TNPO3     | chr7:128645231-128655032:-  | chr7  |
| 2.25E-13 | 2.43E-10 | 7.885  | 0.156 | 5.661 | 0.000 | 0.136 | -0.136 | PPP6R3    | chr11:68363687-68367788:+   | chr11 |
| 7.76E-19 | 1.63E-15 | 10.236 | 1.437 | 2.833 | 0.002 | 0.137 | -0.136 | SLC3A2    | chr11:62648920-62649352:+   | chr11 |
| 1.88E-12 | 1.80E-09 | 8.910  | 2.030 | 2.134 | 0.007 | 0.141 | -0.134 | ELP2      | chr18:33724998-33725896:+   | chr18 |
| 1.14E-08 | 5.43E-06 | 6.270  | 0.176 | 5.158 | 0.000 | 0.132 | -0.132 | GALK2     | chr15:49531565-49574168:+   | chr15 |
| 6.16E-08 | 2.51E-05 | 6.218  | 0.134 | 5.540 | 0.000 | 0.130 | -0.130 | UPF3B     | chrX:118972032-118972329:-  | chrX  |
| 4.09E-05 | 0.00688  | 4.515  | 0.182 | 4.631 | 0.000 | 0.125 | -0.125 | TRAPPC6B  | chr14:39627620-39628686:-   | chr14 |
| 3.54E-09 | 1.85E-06 | 6.286  | 0.166 | 5.240 | 0.000 | 0.124 | -0.124 | SOAT1     | chr1:179318078-179319411:+  | chr1  |
| 3.57E-10 | 2.27E-07 | 6.788  | 0.185 | 5.196 | 0.000 | 0.124 | -0.124 | ZMYM4     | chr1:35871070-35873587:+    | chr1  |
| 5.96E-09 | 2.97E-06 | 6.485  | 0.176 | 5.201 | 0.000 | 0.123 | -0.123 | LIN9      | chr1:226485534-226488873:-  | chr1  |
| 7.13E-12 | 6.03E-09 | 8.643  | 1.337 | 2.692 | 0.003 | 0.125 | -0.122 | C1D       | chr2:68274469-68290089:-    | chr2  |
| 4.30E-05 | 0.00719  | 5.509  | 1.529 | 1.850 | 0.011 | 0.130 | -0.120 | RPS6KA3   | chrX:20194635-20195113:-    | chrX  |
| 1.15E-06 | 0.00034  | 5.598  | 0.134 | 5.384 | 0.000 | 0.118 | -0.118 | MUT       | chr6:49416665-49419178:-    | chr6  |
| 5.80E-06 | 0.00135  | 4.807  | 0.131 | 5.194 | 0.000 | 0.116 | -0.116 | ACAP3     | chr1:1233509-1233749:-      | chr1  |
| 0.0005   | 0.04671  | 5.182  | 1.800 | 1.525 | 0.044 | 0.160 | -0.116 | USP34     | chr2:61415872-61416044:-    | chr2  |
| 5.61E-05 | 0.00891  | 4.964  | 1.004 | 2.306 | 0.004 | 0.118 | -0.113 | PRICKLE3  | chrX:49036186-49040186:-    | chrX  |
| 5.76E-07 | 0.00018  | 6.124  | 1.041 | 2.556 | 0.003 | 0.114 | -0.111 | VPS51     | chr11:64877396-64877934:+   | chr11 |
| 1.38E-07 | 5.11E-05 | 6.108  | 0.141 | 5.441 | 0.000 | 0.108 | -0.108 | HEATR1    | chr1:236738219-236739518:-  | chr1  |
| 1.34E-05 | 0.00275  | 6.939  | 2.665 | 1.381 | 0.019 | 0.127 | -0.108 | VWDE      | chr7:12407145-12409170:-    | chr7  |
| 8.29E-05 | 0.01217  | 7.875  | 4.025 | 0.968 | 0.059 | 0.164 | -0.104 | GCFC2     | chr2:75929574-75933648:-    | chr2  |
| 1.81E-05 | 0.00355  | 4.918  | 0.190 | 4.693 | 0.000 | 0.103 | -0.103 | MTFR1     | chr8:66557020-66582085:+    | chr8  |
| 1.64E-07 | 5.99E-05 | 6.639  | 1.039 | 2.676 | 0.002 | 0.105 | -0.103 | CUL4A     | chr13:113915074-113917776:+ | chr13 |
| 2.25E-05 | 0.00425  | 5.247  | 1.068 | 2.297 | 0.005 | 0.106 | -0.101 | YY1AP1    | chr1:155630725-155631097:-  | chr1  |
| 0.0002   | 0.02859  | 4.076  | 0.143 | 4.832 | 0.000 | 0.100 | -0.100 | DUSP22    | chr6:348842-350802:+        | chr6  |
| 5.37E-05 | 0.00861  | 6.655  | 2.035 | 1.709 | 0.012 | 0.112 | -0.100 | ATP8B2    | chr1:154316731-154316848:+  | chr1  |
| 1.40E-05 | 0.00287  | 6.036  | 1.588 | 1.926 | 0.009 | 0.108 | -0.099 | SLC35A3   | chr1:100477090-100480840:+  | chr1  |
| 6.32E-11 | 4.59E-08 | 10.922 | 1.122 | 3.283 | 0.001 | 0.101 | -0.099 | SF3B1     | chr2:198267784-198268308:-  | chr2  |
| 6.10E-06 | 0.0014   | 5.880  | 1.487 | 1.983 | 0.005 | 0.104 | -0.099 | HECTD3    | chr1:45474012-45474207:-    | chr1  |
| 3.21E-11 | 2.43E-08 | 7.115  | 0.123 | 5.859 | 0.000 | 0.098 | -0.098 | ITFG1     | chr16:47347748-47399698:-   | chr16 |

|          |          |        |        |       |       |       |        |            |                            |       |
|----------|----------|--------|--------|-------|-------|-------|--------|------------|----------------------------|-------|
| 7.20E-06 | 0.00161  | 5.967  | 0.172  | 5.120 | 0.000 | 0.098 | -0.098 | BRCA1      | chr17:41247961-41249260:-  | chr17 |
| 0.0003   | 0.02915  | 5.273  | 1.613  | 1.709 | 0.012 | 0.109 | -0.097 | FBXL19     | chr16:30958270-30958352:+  | chr16 |
| 9.66E-05 | 0.0138   | 5.290  | 0.128  | 5.373 | 0.000 | 0.092 | -0.092 | RECQL      | chr12:21627930-21628401:-  | chr12 |
| 4.79E-06 | 0.00115  | 8.027  | 3.244  | 1.307 | 0.019 | 0.110 | -0.091 | NPLOC4     | chr17:79556146-79563141:-  | chr17 |
| 5.56E-06 | 0.00131  | 8.556  | 2.985  | 1.519 | 0.012 | 0.102 | -0.090 | EIF3B      | chr7:2419147-2419815:+     | chr7  |
| 8.19E-05 | 0.01205  | 4.299  | 0.180  | 4.575 | 0.000 | 0.089 | -0.089 | UBN2       | chr7:138957187-138958026:+ | chr7  |
| 0.0002   | 0.01978  | 4.239  | 0.206  | 4.360 | 0.000 | 0.089 | -0.089 | KDM4A      | chr1:44132227-44132609:+   | chr1  |
| 1.00E-31 | 5.82E-28 | 12.961 | 1.028  | 3.656 | 0.001 | 0.090 | -0.089 | GUK1       | chr1:228335401-228336058:+ | chr1  |
| 0.0002   | 0.02511  | 5.897  | 0.149  | 5.308 | 0.000 | 0.088 | -0.088 | C15orf57   | chr15:40849590-40854970:-  | chr15 |
| 6.66E-06 | 0.00151  | 7.455  | 2.913  | 1.356 | 0.019 | 0.106 | -0.086 | TRABD      | chr22:50635781-50635865:+  | chr22 |
| 1.76E-10 | 1.20E-07 | 6.816  | 0.131  | 5.705 | 0.000 | 0.085 | -0.085 | AKAP8L     | chr19:15491445-15507960:-  | chr19 |
| 3.58E-16 | 5.92E-13 | 9.632  | 1.284  | 2.907 | 0.002 | 0.086 | -0.085 | TPR        | chr1:186300729-186301326:- | chr1  |
| 2.49E-07 | 8.69E-05 | 5.987  | 0.863  | 2.795 | 0.002 | 0.083 | -0.081 | RTF1       | chr15:41762591-41763349:+  | chr15 |
| 4.36E-05 | 0.00727  | 5.435  | 1.454  | 1.903 | 0.007 | 0.087 | -0.081 | MTOR       | chr1:11272544-11272852:-   | chr1  |
| 1.83E-08 | 8.40E-06 | 6.662  | 1.021  | 2.705 | 0.002 | 0.082 | -0.080 | CDC27      | chr17:45216273-45219218:-  | chr17 |
| 1.93E-06 | 0.00053  | 5.898  | 1.112  | 2.407 | 0.002 | 0.082 | -0.080 | FAM76B     | chr11:95513113-95516228:-  | chr11 |
| 2.48E-11 | 1.93E-08 | 8.295  | 1.699  | 2.288 | 0.004 | 0.084 | -0.080 | PDS5A      | chr4:39911977-39915230:-   | chr4  |
| 5.59E-09 | 2.81E-06 | 6.114  | 1.723  | 1.827 | 0.001 | 0.080 | -0.079 | CLEC3B     | chr3:45043101-45046767:+   | chr3  |
| 7.53E-08 | 2.97E-05 | 5.873  | 0.137  | 5.419 | 0.000 | 0.079 | -0.079 | NCAPG      | chr4:17824747-17825253:+   | chr4  |
| 7.77E-06 | 0.00171  | 6.814  | 2.459  | 1.471 | 0.011 | 0.089 | -0.077 | PDHX       | chr11:34953032-34969039:+  | chr11 |
| 6.40E-05 | 0.00992  | 4.950  | 0.117  | 5.402 | 0.000 | 0.077 | -0.077 | STK24      | chr13:99127257-99127503:-  | chr13 |
| 2.60E-09 | 1.40E-06 | 6.825  | 0.905  | 2.914 | 0.001 | 0.076 | -0.074 | SLC5A6     | chr2:27428395-27428893:-   | chr2  |
| 0.0001   | 0.01552  | 4.267  | 0.182  | 4.548 | 0.000 | 0.074 | -0.074 | TMEM179B   | chr11:62555000-62556481:+  | chr11 |
| 5.70E-07 | 0.00018  | 7.629  | 2.248  | 1.763 | 0.005 | 0.079 | -0.074 | MRPS9      | chr2:105713783-105716106:+ | chr2  |
| 1.61E-06 | 0.00045  | 5.769  | 1.037  | 2.476 | 0.002 | 0.075 | -0.073 | NUP98      | chr11:3697620-3697738:-    | chr11 |
| 6.74E-06 | 0.00152  | 5.428  | 0.950  | 2.515 | 0.003 | 0.075 | -0.072 | SNW1       | chr14:78203439-78205120:-  | chr14 |
| 6.55E-08 | 2.65E-05 | 5.936  | 0.209  | 4.831 | 0.000 | 0.071 | -0.071 | TTC3       | chr21:38570327-38572514:+  | chr21 |
| 5.22E-12 | 4.58E-09 | 13.593 | 6.857  | 0.987 | 0.022 | 0.092 | -0.070 | GATA1      | chrX:48651705-48652184:+   | chrX  |
| 1.44E-06 | 0.00041  | 5.151  | 0.147  | 5.128 | 0.000 | 0.069 | -0.069 | ATAD1      | chr10:89519558-89527429:-  | chr10 |
| 0.0004   | 0.04322  | 11.713 | 8.236  | 0.508 | 0.061 | 0.129 | -0.068 | HMGCS1     | chr5:43307947-43313457:-   | chr5  |
| 4.67E-08 | 1.95E-05 | 5.868  | 0.133  | 5.463 | 0.000 | 0.068 | -0.068 | CLASRP     | chr19:45572507-45573243:+  | chr19 |
| 3.05E-05 | 0.00545  | 6.262  | 1.877  | 1.738 | 0.011 | 0.077 | -0.066 | DDIT3      | chr12:57911243-57911488:-  | chr12 |
| 1.82E-05 | 0.00355  | 4.673  | 0.161  | 4.855 | 0.000 | 0.064 | -0.064 | FAM234A    | chr16:313775-313996:+      | chr16 |
| 2.18E-09 | 1.19E-06 | 8.154  | 2.354  | 1.792 | 0.008 | 0.071 | -0.063 | IMMT       | chr2:86398460-86400772:-   | chr2  |
| 0.0005   | 0.04538  | 5.398  | 1.990  | 1.440 | 0.009 | 0.072 | -0.062 | NFE2L2     | chr2:178096759-178097119:- | chr2  |
| 8.01E-10 | 4.83E-07 | 6.980  | 0.235  | 4.890 | 0.000 | 0.062 | -0.062 | LYPLAL1    | chr1:219347324-219352471:+ | chr1  |
| 1.21E-09 | 6.86E-07 | 8.178  | 2.073  | 1.980 | 0.004 | 0.065 | -0.061 | MRPS27     | chr5:71524211-71528269:-   | chr5  |
| 4.47E-05 | 0.00741  | 4.463  | 0.180  | 4.629 | 0.000 | 0.061 | -0.061 | JAK2       | chr9:5080381-5080511:+     | chr9  |
| 4.92E-84 | 1.22E-79 | 30.577 | 10.362 | 1.561 | 0.008 | 0.068 | -0.061 | LRRC75A-AS | chr17:16344445-16344670:+  | chr17 |
| 0.0002   | 0.02703  | 4.732  | 1.117  | 2.083 | 0.004 | 0.063 | -0.059 | PEX3       | chr6:143792587-143792673:+ | chr6  |
| 1.28E-12 | 1.29E-09 | 7.816  | 0.174  | 5.487 | 0.000 | 0.059 | -0.059 | SF3A2      | chr19:2247022-2247564:+    | chr19 |
| 3.54E-05 | 0.00613  | 4.623  | 0.195  | 4.565 | 0.000 | 0.059 | -0.059 | ACAA2      | chr18:47311743-47313660:-  | chr18 |
| 0.0002   | 0.02114  | 5.187  | 1.517  | 1.774 | 0.006 | 0.064 | -0.058 | KCTD9      | chr8:25290170-25290845:-   | chr8  |
| 1.92E-07 | 6.87E-05 | 7.598  | 1.456  | 2.383 | 0.002 | 0.060 | -0.057 | MCM3AP     | chr21:47655361-47656742:-  | chr21 |
| 8.24E-08 | 3.22E-05 | 6.314  | 0.975  | 2.696 | 0.001 | 0.058 | -0.057 | COQ4       | chr9:131087519-131088044:+ | chr9  |
| 3.80E-11 | 2.84E-08 | 7.185  | 0.159  | 5.502 | 0.000 | 0.057 | -0.057 | GPS1       | chr17:80013702-80013861:+  | chr17 |

|          |          |        |        |       |       |       |        |            |                            |       |
|----------|----------|--------|--------|-------|-------|-------|--------|------------|----------------------------|-------|
| 6.73E-07 | 0.00021  | 5.283  | 0.136  | 5.281 | 0.000 | 0.057 | -0.057 | CUL1       | chr7:148451243-148454059:+ | chr7  |
| 6.28E-09 | 3.11E-06 | 7.081  | 1.397  | 2.342 | 0.002 | 0.059 | -0.056 | MAN1A1     | chr6:119511061-119514941:- | chr6  |
| 8.91E-11 | 6.29E-08 | 7.878  | 0.190  | 5.373 | 0.000 | 0.056 | -0.056 | ACSM3      | chr16:20788903-20792021:+  | chr16 |
| 2.94E-08 | 1.29E-05 | 9.212  | 1.529  | 2.591 | 0.001 | 0.057 | -0.055 | LRPPRC     | chr2:44145291-44145394:-   | chr2  |
| 4.23E-15 | 5.89E-12 | 9.914  | 0.235  | 5.398 | 0.000 | 0.055 | -0.055 | LRRC75A-AS | chr17:16343568-16344670:+  | chr17 |
| 1.34E-09 | 7.50E-07 | 8.547  | 2.299  | 1.895 | 0.005 | 0.059 | -0.055 | COPS2      | chr15:49420971-49421673:-  | chr15 |
| 1.49E-06 | 0.00043  | 6.874  | 2.217  | 1.633 | 0.006 | 0.059 | -0.053 | USP15      | chr12:62783480-62783562:+  | chr12 |
| 1.92E-05 | 0.00371  | 4.604  | 0.128  | 5.172 | 0.000 | 0.052 | -0.052 | CDC27      | chr17:45234507-45234595:-  | chr17 |
| 0.0002   | 0.02701  | 5.374  | 1.722  | 1.642 | 0.005 | 0.057 | -0.051 | TCF25      | chr16:89960267-89961424:+  | chr16 |
| 8.04E-06 | 0.00176  | 4.906  | 0.170  | 4.854 | 0.000 | 0.051 | -0.051 | TMEM57     | chr1:25815785-25817874:+   | chr1  |
| 3.13E-06 | 0.0008   | 5.143  | 0.151  | 5.093 | 0.000 | 0.051 | -0.051 | BTK        | chrX:100630322-100641049:- | chrX  |
| 1.09E-39 | 8.09E-36 | 14.414 | 0.999  | 3.851 | 0.000 | 0.050 | -0.049 | NONO       | chrX:70516898-70517210:+   | chrX  |
| 0.0002   | 0.02048  | 4.430  | 0.195  | 4.502 | 0.000 | 0.049 | -0.049 | PPM1M      | chr3:52283339-52283671:+   | chr3  |
| 1.93E-06 | 0.00053  | 5.194  | 0.155  | 5.068 | 0.000 | 0.048 | -0.048 | ORC5       | chr7:103807348-103808920:- | chr7  |
| 2.40E-11 | 1.89E-08 | 7.872  | 1.141  | 2.787 | 0.001 | 0.048 | -0.047 | MRPS18C    | chr4:84378112-84379477:+   | chr4  |
| 4.63E-05 | 0.00764  | 6.118  | 1.947  | 1.652 | 0.005 | 0.052 | -0.047 | CIAO1      | chr2:96934397-96934993:+   | chr2  |
| 4.64E-15 | 6.40E-12 | 8.482  | 0.178  | 5.575 | 0.000 | 0.045 | -0.045 | NOP58      | chr2:203160561-203162080:+ | chr2  |
| 1.61E-12 | 1.57E-09 | 8.508  | 1.499  | 2.505 | 0.002 | 0.046 | -0.044 | NRD1       | chr1:52293559-52299688:-   | chr1  |
| 0.0002   | 0.02703  | 4.093  | 0.148  | 4.793 | 0.000 | 0.044 | -0.044 | ATF6B      | chr6:32095540-32095893:-   | chr6  |
| #####    | #####    | 36.427 | 2.703  | 3.752 | 0.000 | 0.042 | -0.042 | RPL24      | chr3:101401354-101401614:- | chr3  |
| 4.41E-05 | 0.00734  | 5.825  | 1.770  | 1.718 | 0.004 | 0.046 | -0.042 | POLR1E     | chr9:37501842-37503015:+   | chr9  |
| 0.0002   | 0.01971  | 4.199  | 0.132  | 4.996 | 0.000 | 0.042 | -0.042 | FANCD2     | chr3:10088408-10089567:+   | chr3  |
| 6.64E-05 | 0.01024  | 4.418  | 0.203  | 4.445 | 0.000 | 0.041 | -0.041 | KDM3A      | chr2:86705389-86705705:+   | chr2  |
| 3.60E-10 | 2.28E-07 | 11.291 | 1.144  | 3.303 | 0.000 | 0.040 | -0.040 | GTSF1      | chr12:54854276-54855892:-  | chr12 |
| 1.27E-06 | 0.00037  | 5.170  | 0.173  | 4.902 | 0.000 | 0.040 | -0.040 | POM121C    | chr7:75070414-75070709:-   | chr7  |
| 3.52E-07 | 0.00012  | 6.567  | 1.540  | 2.093 | 0.002 | 0.042 | -0.040 | LARS       | chr5:145522669-145522974:- | chr5  |
| 3.62E-10 | 2.28E-07 | 7.809  | 1.576  | 2.309 | 0.002 | 0.039 | -0.038 | TIMM17B    | chrX:48751115-48751182:-   | chrX  |
| 0.0003   | 0.0316   | 6.102  | 2.581  | 1.241 | 0.008 | 0.045 | -0.037 | ABCF2      | chr7:150912186-150912689:- | chr7  |
| 0.0002   | 0.01971  | 6.168  | 1.133  | 2.444 | 0.001 | 0.037 | -0.036 | PRPF38A    | chr1:52880320-52880403:+   | chr1  |
| 0.0005   | 0.04608  | 4.571  | 1.145  | 1.998 | 0.002 | 0.038 | -0.036 | MITD1      | chr2:99788124-99790377:-   | chr2  |
| 0.0003   | 0.02908  | 4.568  | 0.982  | 2.217 | 0.002 | 0.037 | -0.035 | SUPV3L1    | chr10:70955022-70956733:+  | chr10 |
| 1.87E-08 | 8.51E-06 | 13.657 | 8.018  | 0.768 | 0.020 | 0.055 | -0.035 | AP2S1      | chr19:47342878-47349249:-  | chr19 |
| 2.98E-06 | 0.00077  | 5.028  | 0.187  | 4.751 | 0.000 | 0.035 | -0.035 | ENOPH1     | chr4:83376008-83378044:+   | chr4  |
| 1.50E-05 | 0.00302  | 4.634  | 0.126  | 5.196 | 0.000 | 0.034 | -0.034 | ELP2       | chr18:33739794-33739904:+  | chr18 |
| 4.27E-09 | 2.21E-06 | 19.315 | 13.942 | 0.470 | 0.043 | 0.076 | -0.033 |            | chr19:29101239-29101875:+  | chr19 |
| 7.15E-14 | 8.52E-11 | 9.344  | 1.941  | 2.267 | 0.001 | 0.032 | -0.030 | SRSF1      | chr17:56082979-56083161:-  | chr17 |
| 1.58E-06 | 0.00045  | 5.734  | 1.014  | 2.499 | 0.001 | 0.031 | -0.030 | TCERG1     | chr5:145883103-145883371:+ | chr5  |
| 1.52E-07 | 5.60E-05 | 6.510  | 0.139  | 5.546 | 0.000 | 0.030 | -0.030 | NUDT3      | chr6:34256733-34261227:-   | chr6  |
| 5.85E-12 | 5.07E-09 | 7.999  | 1.054  | 2.924 | 0.001 | 0.030 | -0.029 | HSPA4      | chr5:132439719-132439902:+ | chr5  |
| 4.79E-11 | 3.55E-08 | 8.039  | 1.526  | 2.397 | 0.001 | 0.027 | -0.026 | HADHA      | chr2:26437446-26437921:-   | chr2  |
| 2.73E-06 | 0.00071  | 5.649  | 1.009  | 2.485 | 0.001 | 0.027 | -0.026 | FXYS5      | chr19:35646515-35647729:+  | chr19 |
| 1.85E-05 | 0.00359  | 5.156  | 0.157  | 5.034 | 0.000 | 0.026 | -0.026 | ZCCHC17    | chr1:31811896-31819465:+   | chr1  |
| 4.03E-07 | 0.00014  | 5.399  | 0.155  | 5.122 | 0.000 | 0.025 | -0.025 | HIGD2A     | chr5:175815975-175816311:+ | chr5  |
| 1.85E-05 | 0.00359  | 8.087  | 3.966  | 1.028 | 0.008 | 0.032 | -0.024 | FKBP8      | chr19:18643625-18644079:-  | chr19 |
| 1.12E-08 | 5.36E-06 | 6.791  | 1.057  | 2.684 | 0.001 | 0.024 | -0.023 | IARS       | chr9:95007368-95009658:-   | chr9  |
| 8.22E-06 | 0.00179  | 5.142  | 0.088  | 5.868 | 0.000 | 0.022 | -0.022 | PFDN5      | chr12:53689424-53691607:+  | chr12 |

|          |          |        |       |       |       |       |        |        |                             |       |
|----------|----------|--------|-------|-------|-------|-------|--------|--------|-----------------------------|-------|
| 1.19E-09 | 6.82E-07 | 7.431  | 1.409 | 2.399 | 0.001 | 0.023 | -0.022 | MAPK1  | chr22:22118552-22123483:-   | chr22 |
| 2.71E-06 | 0.00071  | 6.205  | 1.549 | 2.002 | 0.002 | 0.024 | -0.022 | MRPS30 | chr5:44813385-44814996:+    | chr5  |
| 9.34E-13 | 9.66E-10 | 8.307  | 1.129 | 2.880 | 0.000 | 0.022 | -0.022 | NHP2   | chr5:177576860-177577888:-  | chr5  |
| 3.70E-22 | 1.04E-18 | 10.827 | 0.145 | 6.226 | 0.000 | 0.021 | -0.021 | TFRC   | chr3:195782191-195785154:-  | chr3  |
| 0.0002   | 0.02351  | 6.333  | 2.576 | 1.298 | 0.005 | 0.025 | -0.020 | PABPC4 | chr1:40031068-40033422:-    | chr1  |
| 5.92E-05 | 0.00929  | 4.470  | 0.196 | 4.514 | 0.000 | 0.019 | -0.019 | PCNP   | chr3:101293124-101298615:+  | chr3  |
| 2.62E-08 | 1.15E-05 | 6.167  | 0.199 | 4.955 | 0.000 | 0.018 | -0.018 | GRHPR  | chr9:37425992-37426519:+    | chr9  |
| 5.80E-05 | 0.00913  | 4.452  | 0.170 | 4.715 | 0.000 | 0.018 | -0.018 | NDC80  | chr18:2601485-2606399:+     | chr18 |
| 0.0002   | 0.02777  | 4.757  | 1.056 | 2.172 | 0.001 | 0.018 | -0.018 | RARS   | chr5:167921656-167922295:+  | chr5  |
| 1.45E-05 | 0.00296  | 7.917  | 2.968 | 1.416 | 0.003 | 0.020 | -0.017 | CCNA2  | chr4:122740084-122740526:-  | chr4  |
| 1.80E-08 | 8.26E-06 | 6.448  | 0.213 | 4.918 | 0.000 | 0.016 | -0.016 | MGST3  | chr1:165619202-165620230:+  | chr1  |
| 2.88E-06 | 0.00075  | 5.704  | 1.015 | 2.490 | 0.001 | 0.016 | -0.016 | FBXW5  | chr9:139837450-139837800:-  | chr9  |
| 2.83E-11 | 2.17E-08 | 9.991  | 1.685 | 2.568 | 0.000 | 0.015 | -0.014 | PA2G4  | chr12:56503078-56503622:+   | chr12 |
| 2.31E-11 | 1.82E-08 | 9.467  | 2.761 | 1.778 | 0.001 | 0.015 | -0.014 | ATP5C1 | chr10:7841158-7841707:+     | chr10 |
| 8.90E-05 | 0.01289  | 6.047  | 2.205 | 1.455 | 0.002 | 0.016 | -0.014 | CLNS1A | chr11:77333735-77336007:-   | chr11 |
| 0.0005   | 0.04801  | 5.478  | 1.823 | 1.587 | 0.001 | 0.015 | -0.013 | BRIX1  | chr5:34922393-34922624:+    | chr5  |
| 0.0003   | 0.03156  | 4.589  | 1.033 | 2.152 | 0.000 | 0.013 | -0.013 | CDC20  | chr1:43826917-43827852:+    | chr1  |
| 5.87E-06 | 0.00137  | 4.855  | 0.120 | 5.338 | 0.000 | 0.012 | -0.012 | EIF3J  | chr15:44846866-44849667:+   | chr15 |
| 0.0002   | 0.02893  | 4.808  | 1.017 | 2.242 | 0.001 | 0.013 | -0.012 | SLC3A2 | chr11:62653081-62655584:+   | chr11 |
| 0.0002   | 0.02322  | 4.715  | 0.999 | 2.238 | 0.001 | 0.010 | -0.010 | NONO   | chrX:70504304-70510460:+    | chrX  |
| 4.97E-07 | 0.00016  | 6.223  | 1.174 | 2.406 | 0.000 | 0.010 | -0.010 | PSMA7  | chr20:60712019-60712419:-   | chr20 |
| 0.0002   | 0.02423  | 5.016  | 1.203 | 2.060 | 0.001 | 0.009 | -0.008 | MRPS10 | chr6:42176133-42176595:-    | chr6  |
| 9.55E-12 | 7.86E-09 | 9.459  | 1.823 | 2.375 | 0.000 | 0.008 | -0.008 | TXN    | chr9:113013761-113018691:-  | chr9  |
| 2.03E-52 | 2.74E-48 | 19.598 | 2.806 | 2.804 | 0.000 | 0.008 | -0.008 | RPL27A | chr11:8704813-8705536:+     | chr11 |
| 9.92E-05 | 0.01409  | 5.925  | 2.133 | 1.474 | 0.001 | 0.009 | -0.008 | CCT2   | chr12:69992202-69993621:+   | chr12 |
| 1.23E-08 | 5.79E-06 | 8.111  | 2.394 | 1.761 | 0.001 | 0.008 | -0.008 | PSMB1  | chr6:170844510-170846321:-  | chr6  |
| 0.0001   | 0.01621  | 8.610  | 4.036 | 1.093 | 0.002 | 0.010 | -0.008 | CCT5   | chr5:10263427-10264749:+    | chr5  |
| 1.15E-52 | 1.71E-48 | 23.663 | 8.096 | 1.547 | 0.001 | 0.008 | -0.007 | RPS27A | chr2:55462099-55462545:+    | chr2  |
| 1.70E-32 | 1.05E-28 | 16.608 | 4.401 | 1.916 | 0.000 | 0.007 | -0.007 | TPT1   | chr13:45911539-45912794:-   | chr13 |
| 0.0003   | 0.03051  | 6.235  | 2.650 | 1.234 | 0.001 | 0.007 | -0.006 |        | chr19:29103062-29103327:+   | chr19 |
| 0.0003   | 0.03468  | 5.159  | 1.032 | 2.322 | 0.000 | 0.006 | -0.006 | CSDE1  | chr1:115263359-115266503:-  | chr1  |
| 5.72E-07 | 0.00018  | 5.690  | 0.145 | 5.290 | 0.000 | 0.005 | -0.005 | CCT4   | chr2:62095857-62096574:-    | chr2  |
| 2.61E-18 | 5.32E-15 | 18.882 | 7.217 | 1.388 | 0.001 | 0.005 | -0.005 | RPS27A | chr2:55462099-55462548:+    | chr2  |
| 2.54E-05 | 0.00465  | 4.822  | 0.145 | 5.059 | 0.000 | 0.005 | -0.005 | TFRC   | chr3:195799040-195800800:-  | chr3  |
| 6.89E-05 | 0.01058  | 5.361  | 0.203 | 4.723 | 0.000 | 0.004 | -0.004 | BRK1   | chr3:10157504-10167295:+    | chr3  |
| 6.94E-14 | 8.34E-11 | 14.150 | 6.551 | 1.111 | 0.001 | 0.004 | -0.003 | RPS10  | chr6:34392633-34392848:-    | chr6  |
| 0.0001   | 0.01675  | 4.278  | 0.136 | 4.978 | 0.000 | 0.002 | -0.002 | ATP5G2 | chr12:54063774-54066359:-   | chr12 |
| 8.09E-11 | 5.74E-08 | 8.477  | 1.411 | 2.587 | 0.000 | 0.002 | -0.002 | RPL9   | chr4:39455867-39456152:-    | chr4  |
| 1.83E-13 | 2.00E-10 | 9.967  | 2.510 | 1.989 | 0.000 | 0.002 | -0.002 | RPL27A | chr11:8705629-8706243:+     | chr11 |
| 8.26E-10 | 4.96E-07 | 7.570  | 0.133 | 5.836 | 0.000 | 0.001 | -0.001 | RPL4   | chr15:66792532-66792630:-   | chr15 |
| 3.60E-06 | 0.00091  | 6.679  | 1.971 | 1.761 | 0.000 | 0.001 | -0.001 | TPT1   | chr13:45912933-45913631:-   | chr13 |
| 2.67E-05 | 0.00483  | 4.722  | 0.128 | 5.203 | 0.000 | 0.001 | -0.001 | HSPA8  | chr11:122929211-122929339:- | chr11 |
| 8.85E-05 | 0.01284  | 5.451  | 1.340 | 2.024 | 0.000 | 0.001 | -0.001 | RPS10  | chr6:34392636-34392848:-    | chr6  |
| 0.0001   | 0.01434  | 4.436  | 0.171 | 4.697 | 0.000 | 0.000 | 0.000  | RPL41  | chr12:56510444-56510537:+   | chr12 |
| 0.0004   | 0.03848  | 4.618  | 1.072 | 2.106 | 0.000 | 0.000 | 0.000  | FTL    | chr19:49469664-49469803:+   | chr19 |
| 1.03E-09 | 6.07E-07 | 10.460 | 4.100 | 1.351 | 0.533 | 0.371 | 0.163  | RPS15A | chr16:18799478-18800302:-   | chr16 |

| n         |           |        |                            | inclusion level WT |             | inclusion level MU |              | read Confs WT     |                   | read Confs MU     |                   |
|-----------|-----------|--------|----------------------------|--------------------|-------------|--------------------|--------------|-------------------|-------------------|-------------------|-------------------|
| start     | end       | strand | distance to canonical site | WT1 (SY061)        | WT2 (SY062) | Mut1 (SY063)       | Mut2 (SY064) | count Data.S Y061 | count Data.S Y062 | count Data.S Y063 | count Data.S Y064 |
| 5717646   | 5719714   | -      | 18                         | 0.000              | 0.000       | 0.800              | 1.000        | 0                 | 0                 | 8                 | 4                 |
| 53689726  | 53691607  | +      | 26                         | 0.000              | 0.000       | 0.838              | 0.774        | 0                 | 0                 | 88                | 24                |
| 102074109 | 102076648 | +      | 23                         | 0.100              | 0.000       | 0.727              | 0.833        | 1                 | 0                 | 8                 | 5                 |
| 16803043  | 16803424  | -      | 43                         | 0.000              | 0.000       | 0.727              | 0.714        | 0                 | 0                 | 8                 | 5                 |
| 995352    | 995438    | +      | 28                         | 0.116              | 0.022       | 0.714              | 0.826        | 5                 | 1                 | 15                | 19                |
| 102276735 | 102286155 | -      | 17                         | 0.000              | 0.000       | 0.727              | 0.667        | 0                 | 0                 | 8                 | 4                 |
| 91269954  | 91271340  | -      | 20                         | 0.060              | 0.093       | 0.702              | 0.844        | 11                | 18                | 59                | 54                |
| 25158620  | 25160574  | -      | 23                         | 0.000              | 0.000       | 0.587              | 0.789        | 0                 | 0                 | 27                | 15                |
| 843275    | 844033    | +      | 6                          | 0.167              | 0.125       | 0.738              | 0.885        | 2                 | 1                 | 45                | 23                |
| 108403189 | 108405274 | +      | 17                         | 0.067              | 0.020       | 0.667              | 0.750        | 1                 | 1                 | 6                 | 6                 |
| 42929951  | 42930884  | -      | 20                         | 0.000              | 0.000       | 0.474              | 0.833        | 0                 | 0                 | 9                 | 5                 |
| 47315814  | 47326808  | -      | 16                         | 0.154              | 0.143       | 0.813              | 0.778        | 2                 | 2                 | 13                | 7                 |
| 89977272  | 89979392  | +      | 10                         | 0.000              | 0.000       | 0.769              | 0.500        | 0                 | 0                 | 10                | 2                 |
| 23283431  | 23285704  | -      | 14                         | 0.059              | 0.029       | 0.607              | 0.739        | 1                 | 1                 | 17                | 17                |
| 85848703  | 85850728  | +      | 20                         | 0.000              | 0.000       | 0.607              | 0.625        | 0                 | 0                 | 17                | 10                |
| 56649301  | 56649931  | +      | 18                         | 0.079              | 0.179       | 0.680              | 0.800        | 3                 | 5                 | 17                | 20                |
| 42835782  | 42845927  | -      | 14                         | 0.111              | 0.050       | 0.716              | 0.659        | 2                 | 1                 | 63                | 29                |
| 156785905 | 156786466 | -      | 18                         | 0.000              | 0.088       | 0.543              | 0.750        | 0                 | 3                 | 19                | 12                |
| 97285514  | 97297048  | -      | 14                         | 0.000              | 0.000       | 0.500              | 0.680        | 0                 | 0                 | 21                | 17                |
| 89778631  | 89779081  | +      | 15                         | 0.038              | 0.035       | 0.554              | 0.682        | 6                 | 5                 | 46                | 30                |
| 109102365 | 109102954 | +      | 12                         | 0.019              | 0.018       | 0.614              | 0.571        | 1                 | 1                 | 27                | 20                |
| 109181708 | 109183328 | +      | 29                         | 0.000              | 0.000       | 0.550              | 0.471        | 0                 | 0                 | 22                | 8                 |
| 45300424  | 45300861  | +      | 13                         | 0.012              | 0.024       | 0.514              | 0.536        | 7                 | 5                 | 330               | 111               |
| 90000306  | 90001195  | +      | 21                         | 0.000              | 0.000       | 0.385              | 0.625        | 0                 | 0                 | 10                | 5                 |
| 94157563  | 94162500  | +      | 16                         | 0.000              | 0.050       | 0.474              | 0.583        | 0                 | 1                 | 9                 | 7                 |
| 36631196  | 36634598  | -      | 17                         | 0.000              | 0.009       | 0.558              | 0.421        | 0                 | 1                 | 29                | 8                 |
| 101458311 | 101460665 | -      | 14                         | 0.003              | 0.015       | 0.419              | 0.566        | 1                 | 4                 | 57                | 47                |
| 172479474 | 172480187 | +      | 18                         | 0.015              | 0.000       | 0.327              | 0.633        | 1                 | 0                 | 18                | 19                |
| 56874549  | 56875878  | +      | 22                         | 0.000              | 0.000       | 0.481              | 0.444        | 0                 | 0                 | 13                | 4                 |
| 93939175  | 93960519  | -      | 40                         | 0.167              | 0.231       | 0.655              | 0.615        | 2                 | 3                 | 19                | 8                 |
| 44492077  | 44492359  | -      | 11                         | 0.000              | 0.024       | 0.313              | 0.571        | 0                 | 1                 | 5                 | 8                 |
| 62574713  | 62576906  | -      | 18                         | 0.025              | 0.000       | 0.395              | 0.458        | 1                 | 0                 | 15                | 11                |
| 103297360 | 103298629 | +      | 14                         | 0.000              | 0.000       | 0.529              | 0.278        | 0                 | 0                 | 18                | 5                 |
| 30884737  | 30884871  | +      | 10                         | 0.005              | 0.007       | 0.354              | 0.455        | 1                 | 1                 | 29                | 10                |
| 35282127  | 35284762  | -      | 22                         | 0.000              | 0.000       | 0.347              | 0.423        | 0                 | 0                 | 17                | 11                |
| 33934265  | 33934966  | -      | 38                         | 0.000              | 0.000       | 0.486              | 0.276        | 0                 | 0                 | 17                | 8                 |
| 23237381  | 23238985  | +      | 14                         | 0.019              | 0.015       | 0.377              | 0.419        | 9                 | 6                 | 116               | 72                |
| 132288401 | 132289210 | +      | 26                         | 0.036              | 0.013       | 0.429              | 0.379        | 2                 | 2                 | 9                 | 11                |
| 20101111  | 20101208  | -      | 26                         | 0.000              | 0.000       | 0.273              | 0.444        | 0                 | 0                 | 6                 | 8                 |
| 196694428 | 196695585 | +      | 14                         | 0.000              | 0.033       | 0.341              | 0.381        | 0                 | 5                 | 44                | 24                |

|           |           |   |    |       |       |       |       |    |    |     |    |
|-----------|-----------|---|----|-------|-------|-------|-------|----|----|-----|----|
| 36351217  | 36352738  | - | 20 | 0.000 | 0.000 | 0.342 | 0.333 | 0  | 0  | 13  | 3  |
| 47970658  | 47971529  | + | 17 | 0.000 | 0.000 | 0.381 | 0.292 | 0  | 0  | 16  | 7  |
| 30811173  | 30818033  | + | 14 | 0.054 | 0.063 | 0.333 | 0.435 | 3  | 3  | 16  | 10 |
| 129284873 | 129285369 | - | 12 | 0.000 | 0.026 | 0.342 | 0.333 | 0  | 1  | 13  | 2  |
| 5595522   | 5598803   | - | 13 | 0.004 | 0.000 | 0.355 | 0.283 | 1  | 0  | 38  | 15 |
| 196792336 | 196792578 | - | 16 | 0.042 | 0.083 | 0.436 | 0.324 | 5  | 12 | 17  | 12 |
| 67936274  | 67937041  | + | 12 | 0.287 | 0.321 | 0.586 | 0.654 | 39 | 45 | 78  | 17 |
| 35813154  | 35813262  | - | 11 | 0.046 | 0.053 | 0.336 | 0.373 | 14 | 16 | 121 | 62 |
| 156532467 | 156532925 | - | 9  | 0.000 | 0.000 | 0.345 | 0.261 | 0  | 0  | 20  | 6  |
| 41040824  | 41046743  | + | 24 | 0.000 | 0.000 | 0.349 | 0.250 | 0  | 0  | 15  | 4  |
| 170388019 | 170393736 | - | 18 | 0.007 | 0.009 | 0.338 | 0.266 | 2  | 2  | 53  | 25 |
| 184577128 | 184580081 | - | 13 | 0.022 | 0.031 | 0.269 | 0.368 | 2  | 3  | 29  | 21 |
| 33934241  | 33934966  | - | 14 | 0.000 | 0.000 | 0.379 | 0.192 | 0  | 0  | 11  | 5  |
| 132288401 | 132289224 | + | 12 | 0.000 | 0.013 | 0.400 | 0.182 | 0  | 2  | 8   | 4  |
| 177684584 | 177686721 | - | 15 | 0.000 | 0.020 | 0.316 | 0.262 | 0  | 3  | 37  | 11 |
| 37416268  | 37417879  | - | 13 | 0.000 | 0.000 | 0.284 | 0.275 | 0  | 0  | 23  | 14 |
| 33319712  | 33321272  | + | 22 | 0.023 | 0.000 | 0.286 | 0.294 | 2  | 0  | 8   | 5  |
| 161518209 | 161519291 | + | 18 | 0.000 | 0.000 | 0.280 | 0.267 | 0  | 0  | 7   | 4  |
| 330008    | 330259    | + | 22 | 0.022 | 0.012 | 0.276 | 0.300 | 1  | 1  | 8   | 6  |
| 74978548  | 74979611  | - | 25 | 0.000 | 0.000 | 0.348 | 0.190 | 0  | 0  | 8   | 4  |
| 125759641 | 125760854 | + | 21 | 0.000 | 0.000 | 0.192 | 0.333 | 0  | 0  | 5   | 6  |
| 179835005 | 179846373 | - | 15 | 0.009 | 0.010 | 0.301 | 0.229 | 1  | 1  | 31  | 11 |
| 62376299  | 62376433  | - | 21 | 0.000 | 0.010 | 0.193 | 0.310 | 0  | 1  | 11  | 9  |
| 29587534  | 29588714  | + | 14 | 0.000 | 0.000 | 0.277 | 0.214 | 0  | 0  | 13  | 6  |
| 3142384   | 3144471   | + | 21 | 0.037 | 0.000 | 0.297 | 0.207 | 3  | 0  | 11  | 6  |
| 57148330  | 57153007  | - | 21 | 0.022 | 0.000 | 0.324 | 0.154 | 2  | 0  | 22  | 6  |
| 24207702  | 24222524  | + | 17 | 0.008 | 0.016 | 0.210 | 0.266 | 1  | 2  | 21  | 17 |
| 91966506  | 91967193  | + | 17 | 0.000 | 0.000 | 0.250 | 0.200 | 0  | 0  | 14  | 6  |
| 99502922  | 99504468  | + | 17 | 0.000 | 0.000 | 0.282 | 0.167 | 0  | 0  | 11  | 3  |
| 212515623 | 212519131 | + | 13 | 0.016 | 0.014 | 0.191 | 0.286 | 4  | 4  | 13  | 8  |
| 19480449  | 19481411  | - | 15 | 0.051 | 0.048 | 0.294 | 0.250 | 8  | 6  | 30  | 12 |
| 185056773 | 185060696 | + | 14 | 0.049 | 0.022 | 0.245 | 0.268 | 8  | 3  | 40  | 30 |
| 201853164 | 201857003 | - | 19 | 0.000 | 0.000 | 0.182 | 0.250 | 0  | 0  | 8   | 3  |
| 39064138  | 39066874  | + | 14 | 0.000 | 0.000 | 0.179 | 0.250 | 0  | 0  | 7   | 5  |
| 5497082   | 5498027   | + | 22 | 0.000 | 0.005 | 0.174 | 0.253 | 0  | 3  | 54  | 56 |
| 9960294   | 9962150   | + | 24 | 0.000 | 0.000 | 0.188 | 0.235 | 0  | 0  | 9   | 4  |
| 37635000  | 37638902  | + | 20 | 0.047 | 0.030 | 0.261 | 0.235 | 3  | 2  | 12  | 4  |
| 52880320  | 52880412  | + | 21 | 0.022 | 0.024 | 0.227 | 0.234 | 16 | 12 | 115 | 64 |
| 3186395   | 3188099   | + | 14 | 0.061 | 0.064 | 0.259 | 0.275 | 6  | 7  | 28  | 14 |
| 37662961  | 37667121  | + | 20 | 0.038 | 0.015 | 0.233 | 0.222 | 3  | 1  | 10  | 4  |
| 122152653 | 122156016 | - | 17 | 0.000 | 0.000 | 0.256 | 0.143 | 0  | 0  | 10  | 3  |
| 142651631 | 142654913 | - | 16 | 0.022 | 0.038 | 0.265 | 0.190 | 5  | 7  | 22  | 11 |
| 129886490 | 129891532 | - | 16 | 0.000 | 0.000 | 0.283 | 0.111 | 0  | 0  | 13  | 2  |
| 74131271  | 74133179  | + | 18 | 0.006 | 0.006 | 0.181 | 0.220 | 1  | 1  | 15  | 11 |
| 19044700  | 19050714  | - | 24 | 0.000 | 0.000 | 0.134 | 0.255 | 0  | 0  | 25  | 38 |
| 32614012  | 32617091  | + | 15 | 0.023 | 0.000 | 0.243 | 0.167 | 1  | 0  | 9   | 2  |

|           |           |   |    |       |       |       |       |   |   |    |    |
|-----------|-----------|---|----|-------|-------|-------|-------|---|---|----|----|
| 33261713  | 33261810  | - | 19 | 0.100 | 0.097 | 0.377 | 0.194 | 5 | 7 | 23 | 7  |
| 4104213   | 4104471   | + | 21 | 0.000 | 0.006 | 0.245 | 0.130 | 0 | 1 | 25 | 6  |
| 110128653 | 110128830 | - | 14 | 0.009 | 0.000 | 0.246 | 0.130 | 2 | 0 | 16 | 6  |
| 186324918 | 186325417 | - | 17 | 0.000 | 0.000 | 0.201 | 0.165 | 0 | 0 | 36 | 16 |
| 109235490 | 109236193 | + | 18 | 0.000 | 0.000 | 0.200 | 0.158 | 0 | 0 | 7  | 3  |
| 53690336  | 53691607  | + | 26 | 0.000 | 0.000 | 0.098 | 0.250 | 0 | 0 | 8  | 8  |
| 115934003 | 115935732 | - | 16 | 0.000 | 0.000 | 0.164 | 0.179 | 0 | 0 | 10 | 5  |
| 67692736  | 67692830  | - | 16 | 0.022 | 0.017 | 0.196 | 0.161 | 2 | 2 | 10 | 5  |
| 64900741  | 64900940  | - | 17 | 0.000 | 0.005 | 0.189 | 0.125 | 0 | 1 | 14 | 7  |
| 229407118 | 229422214 | + | 18 | 0.000 | 0.000 | 0.168 | 0.141 | 0 | 0 | 26 | 9  |
| 33477744  | 33478807  | - | 20 | 0.063 | 0.080 | 0.253 | 0.188 | 2 | 2 | 25 | 9  |
| 35917393  | 35919157  | - | 15 | 0.031 | 0.000 | 0.173 | 0.156 | 3 | 0 | 14 | 7  |
| 51174022  | 51189680  | + | 11 | 0.019 | 0.029 | 0.140 | 0.200 | 3 | 4 | 20 | 12 |
| 39285969  | 39294768  | - | 23 | 0.000 | 0.000 | 0.103 | 0.185 | 0 | 0 | 6  | 5  |
| 118454700 | 118456645 | + | 20 | 0.000 | 0.000 | 0.068 | 0.217 | 0 | 0 | 5  | 5  |
| 177669415 | 177672942 | - | 19 | 0.000 | 0.000 | 0.167 | 0.116 | 0 | 0 | 21 | 5  |
| 80750421  | 80751814  | + | 21 | 0.000 | 0.000 | 0.086 | 0.194 | 0 | 0 | 12 | 12 |
| 128645231 | 128655032 | - | 17 | 0.000 | 0.003 | 0.143 | 0.133 | 0 | 1 | 20 | 12 |
| 68363687  | 68367788  | + | 20 | 0.000 | 0.000 | 0.155 | 0.117 | 0 | 0 | 18 | 7  |
| 62648920  | 62649352  | + | 12 | 0.000 | 0.003 | 0.156 | 0.119 | 0 | 2 | 33 | 16 |
| 33724998  | 33725896  | + | 14 | 0.006 | 0.008 | 0.139 | 0.143 | 2 | 2 | 25 | 12 |
| 49531565  | 49574168  | + | 15 | 0.000 | 0.000 | 0.152 | 0.111 | 0 | 0 | 16 | 6  |
| 118972032 | 118972329 | - | 17 | 0.000 | 0.000 | 0.176 | 0.083 | 0 | 0 | 12 | 3  |
| 39627620  | 39628686  | - | 13 | 0.000 | 0.000 | 0.151 | 0.100 | 0 | 0 | 8  | 3  |
| 179318078 | 179319411 | + | 19 | 0.000 | 0.000 | 0.118 | 0.130 | 0 | 0 | 9  | 7  |
| 35871070  | 35873587  | + | 21 | 0.000 | 0.000 | 0.134 | 0.114 | 0 | 0 | 15 | 9  |
| 226485534 | 226488873 | - | 19 | 0.000 | 0.000 | 0.106 | 0.139 | 0 | 0 | 14 | 11 |
| 68274469  | 68290089  | - | 17 | 0.000 | 0.005 | 0.127 | 0.122 | 0 | 1 | 41 | 18 |
| 20194635  | 20195113  | - | 18 | 0.013 | 0.008 | 0.129 | 0.132 | 1 | 1 | 11 | 5  |
| 49416665  | 49419178  | - | 24 | 0.000 | 0.000 | 0.169 | 0.067 | 0 | 0 | 10 | 2  |
| 1233509   | 1233749   | - | 15 | 0.000 | 0.000 | 0.128 | 0.105 | 0 | 0 | 6  | 4  |
| 61415872  | 61416044  | - | 27 | 0.036 | 0.053 | 0.154 | 0.167 | 1 | 2 | 8  | 5  |
| 49036186  | 49040186  | - | 30 | 0.009 | 0.000 | 0.088 | 0.147 | 1 | 0 | 6  | 5  |
| 64877396  | 64877934  | + | 19 | 0.006 | 0.000 | 0.147 | 0.080 | 1 | 0 | 14 | 4  |
| 236738219 | 236739518 | - | 15 | 0.000 | 0.000 | 0.085 | 0.131 | 0 | 0 | 7  | 8  |
| 12407145  | 12409170  | - | 25 | 0.014 | 0.024 | 0.127 | 0.127 | 2 | 3 | 22 | 9  |
| 75929574  | 75933648  | - | 24 | 0.036 | 0.082 | 0.176 | 0.151 | 4 | 8 | 27 | 11 |
| 66557020  | 66582085  | + | 22 | 0.000 | 0.000 | 0.109 | 0.098 | 0 | 0 | 13 | 4  |
| 113915074 | 113917776 | + | 24 | 0.004 | 0.000 | 0.086 | 0.123 | 1 | 0 | 12 | 9  |
| 155630725 | 155631097 | - | 20 | 0.000 | 0.010 | 0.103 | 0.109 | 0 | 1 | 9  | 5  |
| 348842    | 350802    | + | 19 | 0.000 | 0.000 | 0.130 | 0.070 | 0 | 0 | 7  | 3  |
| 154316731 | 154316848 | + | 22 | 0.012 | 0.012 | 0.151 | 0.072 | 2 | 2 | 16 | 5  |
| 100477090 | 100480840 | + | 17 | 0.017 | 0.000 | 0.147 | 0.069 | 2 | 0 | 16 | 5  |
| 198267784 | 198268308 | - | 24 | 0.000 | 0.003 | 0.073 | 0.129 | 0 | 1 | 31 | 32 |
| 45474012  | 45474207  | - | 18 | 0.011 | 0.000 | 0.095 | 0.113 | 2 | 0 | 10 | 7  |
| 47347748  | 47399698  | - | 13 | 0.000 | 0.000 | 0.079 | 0.117 | 0 | 0 | 9  | 9  |

|           |           |   |    |       |       |       |       |    |    |     |     |
|-----------|-----------|---|----|-------|-------|-------|-------|----|----|-----|-----|
| 41247961  | 41249260  | - | 21 | 0.000 | 0.000 | 0.143 | 0.053 | 0  | 0  | 20  | 3   |
| 30958270  | 30958352  | + | 20 | 0.009 | 0.015 | 0.141 | 0.077 | 1  | 2  | 9   | 2   |
| 21627930  | 21628401  | - | 16 | 0.000 | 0.000 | 0.131 | 0.053 | 0  | 0  | 11  | 2   |
| 79556146  | 79563141  | - | 15 | 0.025 | 0.013 | 0.144 | 0.075 | 6  | 4  | 23  | 8   |
| 2419147   | 2419815   | + | 23 | 0.013 | 0.012 | 0.055 | 0.149 | 5  | 5  | 13  | 15  |
| 138957187 | 138958026 | + | 16 | 0.000 | 0.000 | 0.097 | 0.081 | 0  | 0  | 7   | 3   |
| 44132227  | 44132609  | + | 15 | 0.000 | 0.000 | 0.111 | 0.067 | 0  | 0  | 8   | 2   |
| 228335401 | 228336058 | + | 13 | 0.001 | 0.000 | 0.093 | 0.086 | 1  | 0  | 51  | 28  |
| 40849590  | 40854970  | - | 18 | 0.000 | 0.000 | 0.047 | 0.130 | 0  | 0  | 7   | 14  |
| 50635781  | 50635865  | + | 12 | 0.015 | 0.023 | 0.123 | 0.088 | 3  | 5  | 21  | 6   |
| 15491445  | 15507960  | - | 21 | 0.000 | 0.000 | 0.081 | 0.089 | 0  | 0  | 14  | 7   |
| 186300729 | 186301326 | - | 15 | 0.000 | 0.003 | 0.098 | 0.075 | 0  | 2  | 26  | 9   |
| 41762591  | 41763349  | + | 20 | 0.003 | 0.000 | 0.087 | 0.078 | 1  | 0  | 8   | 4   |
| 11272544  | 11272852  | - | 12 | 0.005 | 0.008 | 0.105 | 0.069 | 1  | 1  | 9   | 5   |
| 45216273  | 45219218  | - | 15 | 0.000 | 0.003 | 0.074 | 0.090 | 0  | 1  | 15  | 6   |
| 95513113  | 95516228  | - | 22 | 0.004 | 0.000 | 0.067 | 0.096 | 1  | 0  | 11  | 8   |
| 39911977  | 39915230  | - | 18 | 0.003 | 0.006 | 0.101 | 0.066 | 1  | 2  | 21  | 9   |
| 45043101  | 45046767  | + | 15 | 0.002 | 0.000 | 0.072 | 0.089 | 1  | 0  | 33  | 17  |
| 17824747  | 17825253  | + | 16 | 0.000 | 0.000 | 0.062 | 0.096 | 0  | 0  | 8   | 7   |
| 34953032  | 34969039  | + | 13 | 0.009 | 0.013 | 0.078 | 0.099 | 2  | 4  | 13  | 8   |
| 99127257  | 99127503  | - | 24 | 0.000 | 0.000 | 0.036 | 0.118 | 0  | 0  | 4   | 6   |
| 27428395  | 27428893  | - | 22 | 0.000 | 0.003 | 0.075 | 0.077 | 0  | 1  | 10  | 7   |
| 62555000  | 62556481  | + | 13 | 0.000 | 0.000 | 0.080 | 0.068 | 0  | 0  | 7   | 4   |
| 105713783 | 105716106 | + | 21 | 0.004 | 0.006 | 0.055 | 0.103 | 2  | 2  | 16  | 16  |
| 3697620   | 3697738   | - | 13 | 0.003 | 0.000 | 0.065 | 0.086 | 1  | 0  | 10  | 6   |
| 78203439  | 78205120  | - | 20 | 0.000 | 0.005 | 0.094 | 0.057 | 0  | 1  | 9   | 3   |
| 38570327  | 38572514  | + | 18 | 0.000 | 0.000 | 0.060 | 0.083 | 0  | 0  | 11  | 9   |
| 48651705  | 48652184  | + | 15 | 0.018 | 0.025 | 0.085 | 0.099 | 20 | 23 | 60  | 32  |
| 89519558  | 89527429  | - | 13 | 0.000 | 0.000 | 0.077 | 0.062 | 0  | 0  | 8   | 4   |
| 43307947  | 43313457  | - | 20 | 0.048 | 0.074 | 0.124 | 0.135 | 29 | 31 | 52  | 19  |
| 45572507  | 45573243  | + | 36 | 0.000 | 0.000 | 0.066 | 0.070 | 0  | 0  | 11  | 6   |
| 57911243  | 57911488  | - | 21 | 0.022 | 0.000 | 0.064 | 0.089 | 2  | 0  | 20  | 11  |
| 313775    | 313996    | + | 18 | 0.000 | 0.000 | 0.068 | 0.061 | 0  | 0  | 8   | 4   |
| 86398460  | 86400772  | - | 24 | 0.009 | 0.007 | 0.076 | 0.066 | 3  | 2  | 21  | 12  |
| 178096759 | 178097119 | - | 22 | 0.005 | 0.014 | 0.084 | 0.060 | 1  | 3  | 9   | 4   |
| 219347324 | 219352471 | + | 17 | 0.000 | 0.000 | 0.053 | 0.071 | 0  | 0  | 23  | 12  |
| 71524211  | 71528269  | - | 15 | 0.007 | 0.000 | 0.057 | 0.072 | 3  | 0  | 28  | 15  |
| 5080381   | 5080511   | + | 21 | 0.000 | 0.000 | 0.060 | 0.063 | 0  | 0  | 6   | 5   |
| 16344445  | 16344670  | + | 11 | 0.006 | 0.009 | 0.066 | 0.070 | 29 | 33 | 394 | 359 |
| 143792587 | 143792673 | + | 20 | 0.008 | 0.000 | 0.056 | 0.069 | 1  | 0  | 7   | 5   |
| 2247022   | 2247564   | + | 28 | 0.000 | 0.000 | 0.070 | 0.048 | 0  | 0  | 22  | 7   |
| 47311743  | 47313660  | - | 21 | 0.000 | 0.000 | 0.068 | 0.049 | 0  | 0  | 10  | 3   |
| 25290170  | 25290845  | - | 16 | 0.006 | 0.005 | 0.078 | 0.050 | 1  | 1  | 10  | 4   |
| 47655361  | 47656742  | - | 20 | 0.000 | 0.005 | 0.047 | 0.072 | 0  | 2  | 13  | 13  |
| 131087519 | 131088044 | + | 13 | 0.000 | 0.003 | 0.065 | 0.052 | 0  | 1  | 11  | 6   |
| 80013702  | 80013861  | + | 15 | 0.000 | 0.000 | 0.047 | 0.067 | 0  | 0  | 14  | 12  |



|           |           |   |    |       |       |       |       |    |    |     |     |
|-----------|-----------|---|----|-------|-------|-------|-------|----|----|-----|-----|
| 148451243 | 148454059 | + | 15 | 0.000 | 0.000 | 0.048 | 0.066 | 0  | 0  | 8   | 4   |
| 119511061 | 119514941 | - | 12 | 0.003 | 0.002 | 0.053 | 0.065 | 1  | 1  | 14  | 8   |
| 20788903  | 20792021  | + | 14 | 0.000 | 0.000 | 0.041 | 0.072 | 0  | 0  | 36  | 9   |
| 44145291  | 44145394  | - | 18 | 0.001 | 0.001 | 0.034 | 0.079 | 1  | 1  | 24  | 19  |
| 16343568  | 16344670  | + | 11 | 0.000 | 0.000 | 0.059 | 0.052 | 0  | 0  | 49  | 28  |
| 49420971  | 49421673  | - | 13 | 0.002 | 0.007 | 0.051 | 0.068 | 1  | 3  | 25  | 18  |
| 62783480  | 62783562  | + | 14 | 0.005 | 0.007 | 0.063 | 0.055 | 2  | 2  | 16  | 10  |
| 45234507  | 45234595  | - | 16 | 0.000 | 0.000 | 0.056 | 0.048 | 0  | 0  | 7   | 3   |
| 89960267  | 89961424  | + | 21 | 0.004 | 0.007 | 0.075 | 0.038 | 1  | 2  | 10  | 3   |
| 25815785  | 25817874  | + | 26 | 0.000 | 0.000 | 0.069 | 0.033 | 0  | 0  | 9   | 3   |
| 100630322 | 100641049 | - | 19 | 0.000 | 0.000 | 0.040 | 0.061 | 0  | 0  | 7   | 7   |
| 70516898  | 70517210  | + | 16 | 0.000 | 0.000 | 0.047 | 0.052 | 0  | 1  | 62  | 31  |
| 52283339  | 52283671  | + | 14 | 0.000 | 0.000 | 0.040 | 0.057 | 0  | 0  | 8   | 6   |
| 103807348 | 103808920 | - | 15 | 0.000 | 0.000 | 0.045 | 0.050 | 0  | 0  | 9   | 6   |
| 84378112  | 84379477  | + | 21 | 0.000 | 0.002 | 0.047 | 0.048 | 0  | 1  | 21  | 15  |
| 96934397  | 96934993  | + | 12 | 0.000 | 0.010 | 0.047 | 0.056 | 0  | 3  | 12  | 9   |
| 203160561 | 203162080 | + | 21 | 0.000 | 0.000 | 0.046 | 0.044 | 0  | 0  | 24  | 10  |
| 52293559  | 52299688  | - | 17 | 0.000 | 0.003 | 0.041 | 0.050 | 0  | 2  | 22  | 14  |
| 32095540  | 32095893  | - | 12 | 0.000 | 0.000 | 0.035 | 0.053 | 0  | 0  | 6   | 4   |
| 101401354 | 101401614 | - | 17 | 0.000 | 0.000 | 0.042 | 0.043 | 3  | 1  | 866 | 330 |
| 37501842  | 37503015  | + | 24 | 0.007 | 0.000 | 0.046 | 0.045 | 3  | 0  | 11  | 5   |
| 10088408  | 10089567  | + | 33 | 0.000 | 0.000 | 0.049 | 0.035 | 0  | 0  | 8   | 2   |
| 86705389  | 86705705  | + | 25 | 0.000 | 0.000 | 0.041 | 0.041 | 0  | 0  | 8   | 4   |
| 54854276  | 54855892  | - | 20 | 0.001 | 0.000 | 0.025 | 0.055 | 1  | 0  | 32  | 36  |
| 75070414  | 75070709  | - | 20 | 0.000 | 0.000 | 0.031 | 0.049 | 0  | 0  | 6   | 5   |
| 145522669 | 145522974 | - | 21 | 0.004 | 0.000 | 0.042 | 0.042 | 2  | 0  | 16  | 7   |
| 48751115  | 48751182  | - | 14 | 0.003 | 0.000 | 0.039 | 0.040 | 2  | 0  | 22  | 12  |
| 150912186 | 150912689 | - | 17 | 0.008 | 0.007 | 0.049 | 0.041 | 4  | 3  | 11  | 5   |
| 52880320  | 52880403  | + | 30 | 0.001 | 0.000 | 0.020 | 0.054 | 1  | 0  | 8   | 12  |
| 99788124  | 99790377  | - | 14 | 0.004 | 0.000 | 0.040 | 0.037 | 1  | 0  | 7   | 5   |
| 70955022  | 70956733  | + | 14 | 0.003 | 0.000 | 0.038 | 0.035 | 1  | 0  | 6   | 3   |
| 47342878  | 47349249  | - | 42 | 0.018 | 0.022 | 0.061 | 0.049 | 22 | 30 | 76  | 30  |
| 83376008  | 83378044  | + | 23 | 0.000 | 0.000 | 0.040 | 0.029 | 0  | 0  | 8   | 4   |
| 33739794  | 33739904  | + | 16 | 0.000 | 0.000 | 0.037 | 0.031 | 0  | 0  | 7   | 3   |
| 29101239  | 29101875  | + | 13 | 0.045 | 0.041 | 0.070 | 0.082 | 86 | 26 | 152 | 144 |
| 56082979  | 56083161  | - | 17 | 0.002 | 0.001 | 0.030 | 0.033 | 3  | 1  | 23  | 14  |
| 145883103 | 145883371 | + | 15 | 0.002 | 0.000 | 0.029 | 0.033 | 1  | 0  | 9   | 6   |
| 34256733  | 34261227  | - | 24 | 0.000 | 0.000 | 0.042 | 0.018 | 0  | 0  | 19  | 4   |
| 132439719 | 132439902 | + | 22 | 0.000 | 0.001 | 0.026 | 0.034 | 0  | 1  | 17  | 14  |
| 26437446  | 26437921  | - | 15 | 0.001 | 0.001 | 0.028 | 0.026 | 1  | 1  | 23  | 11  |
| 35646515  | 35647729  | + | 17 | 0.000 | 0.002 | 0.029 | 0.025 | 0  | 1  | 9   | 5   |
| 31811896  | 31819465  | + | 21 | 0.000 | 0.000 | 0.018 | 0.034 | 0  | 0  | 9   | 10  |
| 175815975 | 175816311 | + | 20 | 0.000 | 0.000 | 0.024 | 0.026 | 0  | 0  | 8   | 5   |
| 18643625  | 18644079  | - | 19 | 0.008 | 0.007 | 0.031 | 0.033 | 8  | 7  | 21  | 10  |
| 95007368  | 95009658  | - | 14 | 0.000 | 0.001 | 0.019 | 0.029 | 0  | 1  | 14  | 9   |
| 53689424  | 53691607  | + | 26 | 0.000 | 0.000 | 0.021 | 0.024 | 0  | 0  | 13  | 7   |

|           |           |   |    |       |       |       |       |    |    |     |     |
|-----------|-----------|---|----|-------|-------|-------|-------|----|----|-----|-----|
| 22118552  | 22123483  | - | 22 | 0.001 | 0.001 | 0.019 | 0.027 | 1  | 1  | 10  | 14  |
| 44813385  | 44814996  | + | 18 | 0.002 | 0.002 | 0.028 | 0.020 | 1  | 1  | 16  | 5   |
| 177576860 | 177577888 | - | 20 | 0.001 | 0.000 | 0.022 | 0.023 | 1  | 0  | 25  | 14  |
| 195782191 | 195785154 | - | 18 | 0.000 | 0.000 | 0.022 | 0.021 | 0  | 0  | 53  | 22  |
| 40031068  | 40033422  | - | 17 | 0.003 | 0.007 | 0.022 | 0.027 | 3  | 4  | 10  | 7   |
| 101293124 | 101298615 | + | 18 | 0.000 | 0.000 | 0.020 | 0.018 | 0  | 0  | 9   | 3   |
| 37425992  | 37426519  | + | 15 | 0.000 | 0.000 | 0.019 | 0.017 | 0  | 0  | 17  | 7   |
| 2601485   | 2606399   | + | 14 | 0.000 | 0.000 | 0.024 | 0.012 | 0  | 0  | 8   | 2   |
| 167921656 | 167922295 | + | 24 | 0.002 | 0.000 | 0.014 | 0.023 | 1  | 0  | 5   | 6   |
| 122740084 | 122740526 | - | 15 | 0.003 | 0.002 | 0.026 | 0.013 | 5  | 3  | 25  | 7   |
| 165619202 | 165620230 | + | 20 | 0.000 | 0.000 | 0.018 | 0.014 | 0  | 0  | 22  | 6   |
| 139837450 | 139837800 | - | 24 | 0.001 | 0.000 | 0.021 | 0.012 | 1  | 0  | 11  | 4   |
| 56503078  | 56503622  | + | 18 | 0.000 | 0.000 | 0.010 | 0.019 | 2  | 1  | 19  | 21  |
| 7841158   | 7841707   | + | 27 | 0.001 | 0.002 | 0.015 | 0.016 | 2  | 3  | 43  | 19  |
| 77333735  | 77336007  | - | 16 | 0.002 | 0.002 | 0.012 | 0.019 | 2  | 2  | 13  | 7   |
| 34922393  | 34922624  | + | 19 | 0.003 | 0.000 | 0.019 | 0.011 | 3  | 0  | 11  | 4   |
| 43826917  | 43827852  | + | 13 | 0.001 | 0.000 | 0.012 | 0.015 | 1  | 0  | 6   | 4   |
| 44846866  | 44849667  | + | 19 | 0.000 | 0.000 | 0.014 | 0.011 | 0  | 0  | 7   | 3   |
| 62653081  | 62655584  | + | 22 | 0.002 | 0.000 | 0.017 | 0.008 | 1  | 0  | 9   | 2   |
| 70504304  | 70510460  | + | 18 | 0.001 | 0.000 | 0.013 | 0.008 | 1  | 0  | 8   | 2   |
| 60712019  | 60712419  | - | 13 | 0.001 | 0.000 | 0.010 | 0.010 | 1  | 0  | 16  | 8   |
| 42176133  | 42176595  | - | 22 | 0.000 | 0.001 | 0.007 | 0.010 | 0  | 1  | 8   | 8   |
| 113013761 | 113018691 | - | 18 | 0.000 | 0.000 | 0.007 | 0.010 | 1  | 1  | 36  | 29  |
| 8704813   | 8705536   | + | 16 | 0.000 | 0.000 | 0.007 | 0.009 | 4  | 1  | 181 | 97  |
| 69992202  | 69993621  | + | 21 | 0.001 | 0.002 | 0.010 | 0.008 | 1  | 3  | 12  | 6   |
| 170844510 | 170846321 | - | 16 | 0.000 | 0.001 | 0.007 | 0.009 | 1  | 3  | 25  | 17  |
| 10263427  | 10264749  | + | 18 | 0.004 | 0.001 | 0.012 | 0.008 | 11 | 4  | 27  | 10  |
| 55462099  | 55462545  | + | 18 | 0.001 | 0.001 | 0.008 | 0.008 | 13 | 21 | 354 | 153 |
| 45911539  | 45912794  | - | 15 | 0.000 | 0.001 | 0.007 | 0.007 | 5  | 5  | 150 | 93  |
| 29103062  | 29103327  | + | 18 | 0.001 | 0.000 | 0.006 | 0.008 | 4  | 0  | 14  | 16  |
| 115263359 | 115266503 | - | 20 | 0.000 | 0.000 | 0.004 | 0.008 | 0  | 1  | 5   | 7   |
| 62095857  | 62096574  | - | 15 | 0.000 | 0.000 | 0.006 | 0.004 | 0  | 0  | 15  | 4   |
| 55462099  | 55462548  | + | 15 | 0.001 | 0.001 | 0.005 | 0.006 | 12 | 15 | 199 | 115 |
| 195799040 | 195800800 | - | 16 | 0.000 | 0.000 | 0.005 | 0.004 | 0  | 0  | 12  | 3   |
| 10157504  | 10167295  | + | 14 | 0.000 | 0.000 | 0.006 | 0.002 | 0  | 0  | 19  | 3   |
| 34392633  | 34392848  | - | 15 | 0.001 | 0.001 | 0.004 | 0.004 | 11 | 13 | 114 | 50  |
| 54063774  | 54066359  | - | 41 | 0.000 | 0.000 | 0.002 | 0.002 | 0  | 0  | 8   | 3   |
| 39455867  | 39456152  | - | 21 | 0.000 | 0.000 | 0.002 | 0.002 | 0  | 1  | 43  | 21  |
| 8705629   | 8706243   | + | 21 | 0.000 | 0.000 | 0.002 | 0.002 | 1  | 3  | 49  | 22  |
| 66792532  | 66792630  | - | 17 | 0.000 | 0.000 | 0.001 | 0.002 | 0  | 0  | 16  | 13  |
| 45912933  | 45913631  | - | 21 | 0.000 | 0.000 | 0.001 | 0.001 | 2  | 0  | 26  | 13  |
| 122929211 | 122929339 | - | 18 | 0.000 | 0.000 | 0.000 | 0.001 | 0  | 0  | 5   | 6   |
| 34392636  | 34392848  | - | 18 | 0.000 | 0.000 | 0.001 | 0.001 | 1  | 0  | 16  | 8   |
| 56510444  | 56510537  | + | 21 | 0.000 | 0.000 | 0.000 | 0.000 | 0  | 0  | 9   | 5   |
| 49469664  | 49469803  | + | 36 | 0.000 | 0.000 | 0.000 | 0.000 | 0  | 1  | 8   | 3   |
| 18799478  | 18800302  | - | 50 | 0.667 | 0.400 | 0.337 | 0.404 | 6  | 2  | 68  | 36  |

**Table S2.** Cryptic 3' Splice Sites Differentially Used by Mutant vs WT SF3B1 MDS Cells

| statistics |           |        |       | inclusion_level             |                                |                                 |                               | Gene       | Locatio                     |       |
|------------|-----------|--------|-------|-----------------------------|--------------------------------|---------------------------------|-------------------------------|------------|-----------------------------|-------|
| pvalue     | padj      | MUT    | WT    | log2fo<br>ld_W<br>T_MU<br>T | inclu<br>sion_<br>level<br>_WT | includi<br>on_lev<br>el_MU<br>T | inclu_<br>diff_<br>WT-<br>MUT | Genename   | transcripts                 | chrom |
| 3.57E-17   | 2.92E-14  | 5.408  | 1.146 | -2.239                      | 0.125                          | 0.890                           | -0.765                        | FXVD5      | chr19:35646515-35647729:+   | chr19 |
| 3.25E-26   | 5.46E-23  | 8.073  | 1.328 | -2.604                      | 0.111                          | 0.831                           | -0.720                        | ATAD1      | chr10:89519558-89527429:-   | chr10 |
| 1.02E-38   | 4.50E-35  | 8.121  | 1.759 | -2.207                      | 0.031                          | 0.720                           | -0.689                        | ZNF91      | chr19:23545542-23556543:-   | chr19 |
| 8.21E-84   | 2.68E-79  | 12.504 | 2.107 | -2.569                      | 0.017                          | 0.638                           | -0.622                        | ORAI2      | chr7:102074109-102076648:+  | chr7  |
| 1.87E-43   | 1.09E-39  | 10.832 | 1.773 | -2.611                      | 0.053                          | 0.652                           | -0.599                        | PFDN5      | chr12:53689726-53691607:+   | chr12 |
| 6.83E-109  | 3.91E-104 | 27.400 | 5.087 | -2.429                      | 0.016                          | 0.580                           | -0.564                        | CCDC88B    | chr11:64119859-64120198:+   | chr11 |
| 9.00E-20   | 9.10E-17  | 5.968  | 1.513 | -1.980                      | 0.066                          | 0.620                           | -0.554                        | VPS9D1-AS1 | chr16:89778631-89779081:+   | chr16 |
| 2.04E-31   | 5.19E-28  | 11.795 | 4.908 | -1.265                      | 0.111                          | 0.664                           | -0.553                        | MAP3K7     | chr6:91269954-91271340:-    | chr6  |
| 1.15E-16   | 8.67E-14  | 5.442  | 1.357 | -2.004                      | 0.127                          | 0.676                           | -0.549                        | HIGD1A     | chr3:42835782-42845927:-    | chr3  |
| 1.06E-14   | 6.27E-12  | 5.947  | 2.057 | -1.531                      | 0.140                          | 0.673                           | -0.533                        | MZB1       | chr5:138725126-138725368:-  | chr5  |
| 1.67E-29   | 3.60E-26  | 9.104  | 1.343 | -2.761                      | 0.018                          | 0.551                           | -0.532                        | GCC2       | chr2:109102365-109102954:+  | chr2  |
| 1.28E-05   | 0.0017    | 3.496  | 1.172 | -1.577                      | 0.042                          | 0.565                           | -0.523                        | NDUFV2-AS1 | chr18:9133521-9136361:-     | chr18 |
| 2.77E-24   | 4.22E-21  | 6.783  | 0.563 | -3.591                      | 0.005                          | 0.526                           | -0.521                        | USP39      | chr2:85848703-85850728:+    | chr2  |
| 4.61E-17   | 3.72E-14  | 7.715  | 1.401 | -2.462                      | 0.034                          | 0.549                           | -0.515                        |            | chr8:65716854-65718145:-    | chr8  |
| 3.15E-16   | 2.26E-13  | 4.646  | 0.708 | -2.714                      | 0.006                          | 0.516                           | -0.509                        | SEPSECS    | chr4:25158620-25160574:-    | chr4  |
| 4.19E-182  | 9.58E-177 | 23.928 | 5.928 | -2.013                      | 0.024                          | 0.524                           | -0.501                        | MICAL1     | chr6:109767079-109767338:-  | chr6  |
| 2.75E-08   | 7.10E-06  | 5.857  | 3.196 | -0.874                      | 0.277                          | 0.775                           | -0.498                        | ZNF41      | chrX:47315814-47326808:-    | chrX  |
| 1.83E-36   | 6.53E-33  | 10.050 | 1.802 | -2.480                      | 0.063                          | 0.553                           | -0.490                        | PPM1M      | chr3:52283339-52283671:+    | chr3  |
| 1.57E-44   | 9.94E-41  | 8.169  | 1.193 | -2.775                      | 0.014                          | 0.497                           | -0.483                        | KANSL3     | chr2:97285514-97297048:-    | chr2  |
| 1.20E-21   | 1.46E-18  | 6.074  | 1.174 | -2.371                      | 0.008                          | 0.456                           | -0.448                        | IL17RC     | chr3:9960294-9962150:+      | chr3  |
| 6.09E-15   | 3.69E-12  | 4.707  | 0.751 | -2.649                      | 0.034                          | 0.479                           | -0.446                        | ZNF530     | chr19:58115775-58117036:+   | chr19 |
| 6.57E-48   | 5.37E-44  | 19.340 | 7.061 | -1.454                      | 0.052                          | 0.495                           | -0.443                        | PPP2R5A    | chr1:212515623-212519131:+  | chr1  |
| 8.49E-47   | 6.69E-43  | 25.165 | 7.538 | -1.739                      | 0.043                          | 0.485                           | -0.443                        | OXA1L      | chr14:23237381-23238985:+   | chr14 |
| 1.90E-19   | 1.84E-16  | 7.185  | 1.965 | -1.871                      | 0.039                          | 0.481                           | -0.441                        | CASD1      | chr7:94157563-94162500:+    | chr7  |
| 7.54E-17   | 5.84E-14  | 7.641  | 1.108 | -2.786                      | 0.017                          | 0.456                           | -0.439                        | ZNF548     | chr19:57908543-57909780:+   | chr19 |
| 2.04E-07   | 4.36E-05  | 6.595  | 2.453 | -1.427                      | 0.123                          | 0.552                           | -0.429                        | DOCK10     | chr2:225670232-225670842:-  | chr2  |
| 6.14E-30   | 1.35E-26  | 7.282  | 0.632 | -3.527                      | 0.003                          | 0.431                           | -0.428                        | IQGAP3     | chr1:156532467-156532925:-  | chr1  |
| 2.29E-21   | 2.67E-18  | 6.605  | 1.501 | -2.138                      | 0.015                          | 0.429                           | -0.413                        | VPS8       | chr3:184566984-184567705:+  | chr3  |
| 4.83E-14   | 2.71E-11  | 5.492  | 0.102 | -5.746                      | 0.000                          | 0.410                           | -0.410                        | MYL6       | chr12:56552496-56553390:+   | chr12 |
| 1.03E-28   | 2.17E-25  | 17.632 | 4.222 | -2.062                      | 0.016                          | 0.418                           | -0.402                        | MYL4       | chr17:45300424-45300861:+   | chr17 |
| 2.15E-38   | 8.80E-35  | 8.152  | 1.666 | -2.291                      | 0.031                          | 0.432                           | -0.401                        | FAM134A    | chr2:220044486-220044888:+  | chr2  |
| 5.89E-16   | 4.07E-13  | 5.097  | 0.751 | -2.764                      | 0.005                          | 0.397                           | -0.392                        | NDUFB8     | chr10:102276735-102286155:- | chr10 |
| 8.73E-62   | 1.54E-57  | 11.241 | 0.091 | -6.949                      | 0.000                          | 0.390                           | -0.390                        | DIP2A      | chr21:47970658-47971529:+   | chr21 |
| 1.01E-05   | 0.0014    | 5.142  | 1.976 | -1.380                      | 0.162                          | 0.552                           | -0.390                        | ARRDC1     | chr9:140508222-140508388:+  | chr9  |
| 2.20E-09   | 6.84E-07  | 4.187  | 1.205 | -1.797                      | 0.024                          | 0.412                           | -0.388                        | FAM188B    | chr7:30811173-30818033:+    | chr7  |
| 6.27E-16   | 4.32E-13  | 5.609  | 0.732 | -2.938                      | 0.003                          | 0.390                           | -0.386                        | GUCY1B3    | chr4:156721227-156723466:+  | chr4  |
| 1.49E-22   | 2.01E-19  | 7.334  | 0.706 | -3.377                      | 0.003                          | 0.385                           | -0.382                        | CEP135     | chr4:56874549-56875878:+    | chr4  |
| 1.95E-12   | 8.96E-10  | 4.179  | 0.597 | -2.808                      | 0.004                          | 0.382                           | -0.377                        | HELLS      | chr10:96305665-96306117:+   | chr10 |
| 1.39E-37   | 5.40E-34  | 16.441 | 5.719 | -1.523                      | 0.045                          | 0.416                           | -0.371                        | HINT2      | chr9:35813154-35813262:-    | chr9  |
| 6.47E-09   | 1.87E-06  | 5.254  | 1.178 | -2.157                      | 0.017                          | 0.382                           | -0.366                        | HERC2P2    | chr15:23283431-23285704:-   | chr15 |
| 2.42E-14   | 1.38E-11  | 8.805  | 3.725 | -1.241                      | 0.387                          | 0.743                           | -0.356                        | ANKRD11    | chr16:89358208-89371613:-   | chr16 |
| 1.37E-36   | 5.05E-33  | 10.150 | 3.592 | -1.499                      | 0.039                          | 0.392                           | -0.353                        | GSAP       | chr7:76943821-76950041:-    | chr7  |
| 6.66E-10   | 2.24E-07  | 6.647  | 2.882 | -1.206                      | 0.080                          | 0.429                           | -0.349                        | IDUA       | chr4:995352-995438:+        | chr4  |
| 4.62E-15   | 2.86E-12  | 8.387  | 2.409 | -1.800                      | 0.031                          | 0.375                           | -0.344                        | RWDD4      | chr4:184577128-184580081:-  | chr4  |
| 3.66E-15   | 2.30E-12  | 6.266  | 2.105 | -1.573                      | 0.056                          | 0.396                           | -0.341                        | WDR90      | chr16:708345-708509:+       | chr16 |
| 3.19E-08   | 8.13E-06  | 7.109  | 3.023 | -1.234                      | 0.085                          | 0.421                           | -0.336                        | CCDC66     | chr3:56649301-56649931:+    | chr3  |
| 1.86E-27   | 3.46E-24  | 6.812  | 0.556 | -3.614                      | 0.005                          | 0.338                           | -0.333                        | TRIM37     | chr17:57148330-57153007:-   | chr17 |
| 1.64E-17   | 1.38E-14  | 7.788  | 0.895 | -3.121                      | 0.004                          | 0.333                           | -0.329                        | TBRG1      | chr11:124495800-124496355:+ | chr11 |
| 6.94E-12   | 3.02E-09  | 7.588  | 1.251 | -2.600                      | 0.010                          | 0.338                           | -0.328                        | LIG3       | chr17:33319712-33321272:+   | chr17 |

|          |          |        |       |        |       |       |        |            |                             |       |
|----------|----------|--------|-------|--------|-------|-------|--------|------------|-----------------------------|-------|
| 2.77E-48 | 2.34E-44 | 8.788  | 0.848 | -3.373 | 0.003 | 0.316 | -0.313 | DPH5       | chr1:101458311-101460665:-  | chr1  |
| 1.10E-19 | 1.11E-16 | 9.579  | 3.891 | -1.300 | 0.054 | 0.365 | -0.310 | DLG1       | chr3:196792336-196792578:-  | chr3  |
| 6.18E-08 | 1.47E-05 | 4.228  | 1.614 | -1.389 | 0.063 | 0.364 | -0.301 | RIOK1      | chr6:7393537-7395239:+      | chr6  |
| 3.71E-17 | 3.01E-14 | 5.377  | 1.080 | -2.316 | 0.006 | 0.306 | -0.300 | COL23A1    | chr5:177684584-177686721:-  | chr5  |
| 7.19E-17 | 5.61E-14 | 8.846  | 1.300 | -2.767 | 0.004 | 0.297 | -0.294 | CCDC125    | chr5:68602750-68603777:-    | chr5  |
| 1.55E-44 | 9.94E-41 | 7.780  | 0.549 | -3.826 | 0.002 | 0.290 | -0.288 | NFYA       | chr6:41040824-41046743:+    | chr6  |
| 1.94E-22 | 2.61E-19 | 11.354 | 0.959 | -3.566 | 0.002 | 0.284 | -0.281 | EML3       | chr11:62376299-62376433:-   | chr11 |
| 7.51E-07 | 0.00014  | 7.697  | 4.920 | -0.646 | 0.308 | 0.583 | -0.276 | STARD8     | chrX:67936274-67937041:+    | chrX  |
| 3.16E-20 | 3.33E-17 | 5.262  | 0.094 | -5.807 | 0.000 | 0.275 | -0.275 | CDK8       | chr13:26970492-26971275:+   | chr13 |
| 3.59E-05 | 0.00402  | 5.598  | 2.852 | -0.973 | 0.130 | 0.392 | -0.262 | IFI35      | chr17:41164295-41164946:+   | chr17 |
| 0.00034  | 0.02326  | 4.987  | 3.089 | -0.691 | 0.139 | 0.398 | -0.259 | DERL3      | chr22:24177167-24179250:-   | chr22 |
| 6.35E-14 | 3.52E-11 | 5.246  | 1.592 | -1.721 | 0.021 | 0.277 | -0.257 | TCP11L1    | chr11:33080642-33083060:+   | chr11 |
| 2.21E-64 | 5.06E-60 | 20.181 | 2.074 | -3.283 | 0.002 | 0.257 | -0.255 | TYMP       | chr22:50966162-50966940:-   | chr22 |
| 2.61E-15 | 1.65E-12 | 6.007  | 1.850 | -1.699 | 0.032 | 0.285 | -0.253 | GABPA      | chr21:27107890-27113871:+   | chr21 |
| 1.18E-27 | 2.20E-24 | 7.710  | 1.286 | -2.584 | 0.005 | 0.257 | -0.251 | FAM132B    | chr2:239070358-239071364:+  | chr2  |
| 8.67E-28 | 1.68E-24 | 6.184  | 0.751 | -3.042 | 0.004 | 0.253 | -0.249 | HTT        | chr4:3142384-3144471:+      | chr4  |
| 3.92E-07 | 7.90E-05 | 6.611  | 3.381 | -0.968 | 0.101 | 0.345 | -0.244 | PCNXL3     | chr11:65388438-65389694:+   | chr11 |
| 1.22E-08 | 3.38E-06 | 7.020  | 3.581 | -0.971 | 0.105 | 0.348 | -0.243 | TTI1       | chr20:36631196-36634598:-   | chr20 |
| 3.25E-32 | 8.53E-29 | 7.155  | 0.987 | -2.857 | 0.003 | 0.242 | -0.238 | ZMYM4      | chr1:35871070-35873587:+    | chr1  |
| 3.59E-18 | 3.13E-15 | 6.473  | 0.951 | -2.767 | 0.003 | 0.241 | -0.238 | TPP2       | chr13:103297360-103298629:+ | chr13 |
| 4.73E-17 | 3.80E-14 | 4.951  | 0.735 | -2.753 | 0.006 | 0.240 | -0.234 | FBN2       | chr5:127624271-127624818:-  | chr5  |
| 8.79E-13 | 4.25E-10 | 5.796  | 1.570 | -1.884 | 0.023 | 0.252 | -0.229 | EPG5       | chr18:43459193-43460039:-   | chr18 |
| 1.08E-05 | 0.00147  | 8.231  | 2.571 | -1.678 | 0.030 | 0.259 | -0.229 | TMC5       | chr16:19498664-19499145:-   | chr16 |
| 2.57E-16 | 1.86E-13 | 5.914  | 1.463 | -2.015 | 0.015 | 0.243 | -0.227 | SMURF2     | chr17:62574713-62576906:-   | chr17 |
| 1.73E-28 | 3.52E-25 | 7.376  | 0.986 | -2.903 | 0.005 | 0.232 | -0.227 | GTF2I      | chr7:74131271-74133179:+    | chr7  |
| 5.69E-14 | 3.16E-11 | 4.374  | 0.545 | -3.004 | 0.003 | 0.229 | -0.226 | ADCY4      | chr14:24788662-24788947:-   | chr14 |
| 3.70E-16 | 2.63E-13 | 6.523  | 0.613 | -3.411 | 0.002 | 0.228 | -0.226 | ECT2       | chr3:172479474-172480187:+  | chr3  |
| 2.82E-22 | 3.69E-19 | 8.779  | 0.578 | -3.924 | 0.001 | 0.226 | -0.225 | C1D        | chr2:68274469-68290089:-    | chr2  |
| 5.03E-17 | 4.02E-14 | 6.045  | 0.768 | -2.976 | 0.003 | 0.227 | -0.224 | ZFYVE27    | chr10:99502922-99504468:+   | chr10 |
| 2.69E-10 | 9.59E-08 | 7.167  | 1.548 | -2.211 | 0.010 | 0.233 | -0.223 | FAM13A-AS1 | chr4:89633169-89643287:+    | chr4  |
| 1.82E-56 | 2.31E-52 | 13.043 | 2.077 | -2.651 | 0.005 | 0.222 | -0.217 | SAFB2      | chr19:5595522-5598803:-     | chr19 |
| 8.99E-24 | 1.32E-20 | 8.214  | 3.319 | -1.307 | 0.039 | 0.254 | -0.214 | RNF2       | chr1:185056773-185060696:+  | chr1  |
| 3.07E-11 | 1.25E-08 | 8.173  | 3.112 | -1.393 | 0.027 | 0.240 | -0.213 | KIAA0196   | chr8:126051219-126052036:-  | chr8  |
| 2.52E-21 | 2.91E-18 | 5.986  | 0.785 | -2.930 | 0.004 | 0.217 | -0.213 | TOR1AIP2   | chr1:179835005-179846373:-  | chr1  |
| 6.75E-23 | 9.30E-20 | 6.425  | 0.707 | -3.184 | 0.002 | 0.214 | -0.212 | FASTKD1    | chr2:170388019-170393736:-  | chr2  |
| 8.48E-14 | 4.66E-11 | 4.831  | 0.851 | -2.505 | 0.003 | 0.215 | -0.212 | CHD7       | chr8:61741366-61742868:+    | chr8  |
| 2.40E-06 | 0.0004   | 4.326  | 2.099 | -1.043 | 0.044 | 0.253 | -0.209 | IDUA       | chr4:995352-995433:+        | chr4  |
| 1.01E-32 | 2.79E-29 | 7.363  | 1.530 | -2.266 | 0.010 | 0.216 | -0.206 | MAN2A1     | chr5:109181708-109183328:+  | chr5  |
| 2.56E-07 | 5.34E-05 | 12.602 | 4.080 | -1.627 | 0.058 | 0.264 | -0.206 | TMCC2      | chr1:205240384-205240923:+  | chr1  |
| 7.14E-08 | 1.68E-05 | 9.642  | 5.351 | -0.849 | 0.099 | 0.303 | -0.204 | UBR4       | chr1:19480449-19481411:-    | chr1  |
| 3.77E-20 | 3.90E-17 | 6.985  | 1.556 | -2.167 | 0.009 | 0.211 | -0.203 | DNAJC3     | chr13:96377507-96409878:+   | chr13 |
| 1.84E-13 | 9.78E-11 | 5.879  | 0.989 | -2.571 | 0.004 | 0.205 | -0.201 | VAR52      | chr6:30884737-30884871:+    | chr6  |
| 4.44E-58 | 6.35E-54 | 10.980 | 2.606 | -2.075 | 0.012 | 0.210 | -0.198 | STIM1      | chr11:4104213-4104471:+     | chr11 |
| 8.03E-13 | 3.95E-10 | 4.829  | 0.951 | -2.345 | 0.010 | 0.208 | -0.197 | CBY1       | chr22:39064138-39066874:+   | chr22 |
| 2.62E-16 | 1.89E-13 | 5.870  | 1.281 | -2.196 | 0.006 | 0.202 | -0.196 | FIG4       | chr6:110085186-110086201:+  | chr6  |
| 0.00014  | 0.01219  | 3.709  | 1.805 | -1.039 | 0.055 | 0.250 | -0.195 | CDC7       | chr1:91966506-91967193:+    | chr1  |
| 3.62E-10 | 1.26E-07 | 8.215  | 1.803 | -2.188 | 0.015 | 0.209 | -0.195 | RNF38      | chr9:36351217-36352738:-    | chr9  |
| 5.49E-15 | 3.37E-12 | 11.561 | 1.854 | -2.640 | 0.006 | 0.199 | -0.193 | SLC7A7     | chr14:23242938-23243141:-   | chr14 |
| 9.71E-21 | 1.08E-17 | 5.373  | 0.587 | -3.194 | 0.003 | 0.194 | -0.192 | UBXN2A     | chr2:24207702-24222524:+    | chr2  |
| 7.93E-10 | 2.63E-07 | 5.488  | 1.984 | -1.468 | 0.027 | 0.218 | -0.191 | VPS8       | chr3:184587317-184588487:+  | chr3  |
| 8.31E-17 | 6.38E-14 | 5.841  | 0.979 | -2.577 | 0.005 | 0.195 | -0.190 | SCLT1      | chr4:129886490-129891532:-  | chr4  |
| 1.11E-44 | 7.47E-41 | 9.546  | 2.360 | -2.016 | 0.011 | 0.201 | -0.190 | PDLIM7     | chr5:176916843-176917870:-  | chr5  |
| 1.24E-15 | 8.13E-13 | 5.750  | 0.540 | -3.413 | 0.002 | 0.192 | -0.189 | SUPV3L1    | chr10:70955022-70956733:+   | chr10 |
| 1.25E-14 | 7.32E-12 | 7.366  | 2.580 | -1.514 | 0.018 | 0.206 | -0.188 | HYI        | chr1:43917703-43917875:-    | chr1  |
| 1.17E-13 | 6.41E-11 | 7.964  | 1.493 | -2.415 | 0.008 | 0.195 | -0.187 | TMEM179B   | chr11:62555000-62556481:+   | chr11 |
| 5.80E-40 | 2.88E-36 | 10.072 | 1.851 | -2.444 | 0.007 | 0.192 | -0.185 | PLXND1     | chr3:129284873-129285369:-  | chr3  |

|          |          |        |       |        |       |       |        |          |                             |       |
|----------|----------|--------|-------|--------|-------|-------|--------|----------|-----------------------------|-------|
| 9.72E-13 | 4.67E-10 | 8.267  | 3.213 | -1.364 | 0.024 | 0.206 | -0.182 | RECQL    | chr12:21627930-21628401:-   | chr12 |
| 1.00E-12 | 4.78E-10 | 5.461  | 1.231 | -2.150 | 0.005 | 0.186 | -0.181 | DOCK5    | chr8:25224487-25225688:+    | chr8  |
| 7.71E-39 | 3.46E-35 | 11.286 | 3.540 | -1.673 | 0.019 | 0.199 | -0.180 | PRPF38A  | chr1:52880320-52880412:+    | chr1  |
| 2.67E-29 | 5.64E-26 | 7.348  | 1.448 | -2.344 | 0.008 | 0.185 | -0.177 | OAS1     | chr12:113346630-113348840:+ | chr12 |
| 1.20E-22 | 1.63E-19 | 6.843  | 1.602 | -2.094 | 0.007 | 0.183 | -0.176 | HYI      | chr1:43917718-43917875:-    | chr1  |
| 1.11E-28 | 2.32E-25 | 6.617  | 0.865 | -2.935 | 0.003 | 0.179 | -0.176 | MUT      | chr6:49416665-49419178:-    | chr6  |
| 6.86E-19 | 6.28E-16 | 5.485  | 0.710 | -2.949 | 0.003 | 0.178 | -0.175 | RDX      | chr11:110128653-110128830:- | chr11 |
| 5.41E-60 | 8.84E-56 | 14.915 | 4.041 | -1.884 | 0.013 | 0.187 | -0.175 | SHKBP1   | chr19:41084119-41084353:+   | chr19 |
| 2.84E-14 | 1.62E-11 | 5.102  | 1.337 | -1.932 | 0.012 | 0.186 | -0.174 | RABGAP1  | chr9:125759641-125760854:+  | chr9  |
| 1.04E-10 | 3.97E-08 | 7.275  | 3.977 | -0.871 | 0.695 | 0.865 | -0.171 | USP34    | chr2:61415872-61416044:-    | chr2  |
| 2.65E-09 | 8.13E-07 | 8.058  | 1.395 | -2.530 | 0.005 | 0.176 | -0.171 | TRIM10   | chr6:30124850-30125145:-    | chr6  |
| 4.54E-08 | 1.12E-05 | 3.697  | 0.910 | -2.022 | 0.015 | 0.183 | -0.168 | ESPL1    | chr12:53666642-53668573:+   | chr12 |
| 2.86E-54 | 3.11E-50 | 10.599 | 1.448 | -2.872 | 0.002 | 0.167 | -0.165 | FAR2     | chr12:29450134-29460566:+   | chr12 |
| 2.92E-07 | 6.04E-05 | 4.840  | 2.310 | -1.067 | 0.040 | 0.205 | -0.164 | SETD4    | chr21:37416268-37417879:-   | chr21 |
| 0.00011  | 0.00981  | 4.690  | 2.717 | -0.787 | 0.075 | 0.237 | -0.162 | DHX35    | chr20:37635000-37638902:+   | chr20 |
| 4.54E-05 | 0.00486  | 4.202  | 2.089 | -1.008 | 0.456 | 0.617 | -0.162 | PRKCSH   | chr19:11546528-11546892:+   | chr19 |
| 8.04E-21 | 8.97E-18 | 8.185  | 2.591 | -1.659 | 0.019 | 0.178 | -0.159 | ANKRD13A | chr12:110437590-110449795:+ | chr12 |
| 2.84E-11 | 1.17E-08 | 4.518  | 0.543 | -3.057 | 0.003 | 0.160 | -0.157 | NDRG3    | chr20:35282127-35284762:-   | chr20 |
| 8.92E-19 | 8.09E-16 | 6.003  | 0.506 | -3.569 | 0.001 | 0.154 | -0.153 | UPF3B    | chrX:118972032-118972329:-  | chrX  |
| 4.65E-06 | 0.00072  | 4.773  | 2.498 | -0.934 | 0.050 | 0.202 | -0.152 | SH2D2A   | chr1:156785905-156786466:-  | chr1  |
| 1.25E-35 | 4.03E-32 | 7.577  | 0.531 | -3.835 | 0.001 | 0.153 | -0.152 | TNPO3    | chr7:128645231-128655032:-  | chr7  |
| 4.25E-14 | 2.39E-11 | 5.560  | 0.958 | -2.537 | 0.006 | 0.155 | -0.149 | CC2D1A   | chr19:14031736-14034130:+   | chr19 |
| 3.34E-31 | 8.29E-28 | 8.385  | 0.617 | -3.765 | 0.001 | 0.149 | -0.148 | NET1     | chr10:5497082-5498027:+     | chr10 |
| 3.82E-07 | 7.74E-05 | 9.014  | 4.780 | -0.915 | 0.069 | 0.217 | -0.148 | BUB1B    | chr15:40493182-40494590:+   | chr15 |
| 3.65E-07 | 7.42E-05 | 6.363  | 3.483 | -0.869 | 0.085 | 0.232 | -0.148 | RASGRP2  | chr11:64494851-64496334:-   | chr11 |
| 4.20E-22 | 5.36E-19 | 7.463  | 2.390 | -1.643 | 0.018 | 0.165 | -0.147 | C7orf43  | chr7:99752805-99752884:-    | chr7  |
| 0.00052  | 0.03208  | 6.095  | 2.693 | -1.178 | 0.058 | 0.204 | -0.145 | WAC      | chr10:28824687-28824838:+   | chr10 |
| 2.15E-19 | 2.07E-16 | 8.318  | 3.925 | -1.084 | 0.039 | 0.184 | -0.145 | UBA7     | chr3:49848903-49849302:-    | chr3  |
| 3.30E-09 | 1.00E-06 | 7.102  | 1.011 | -2.812 | 0.002 | 0.146 | -0.143 | MRE11A   | chr11:94192765-94194101:-   | chr11 |
| 5.32E-13 | 2.66E-10 | 4.569  | 0.767 | -2.574 | 0.010 | 0.147 | -0.137 | PRPF38B  | chr1:109235490-109236193:+  | chr1  |
| 2.99E-21 | 3.40E-18 | 5.976  | 1.187 | -2.332 | 0.008 | 0.142 | -0.134 | ITSN2    | chr2:24538115-24550920:-    | chr2  |
| 1.24E-11 | 5.22E-09 | 5.220  | 0.100 | -5.712 | 0.000 | 0.133 | -0.133 | NOP58    | chr2:203157627-203162080:+  | chr2  |
| 4.28E-39 | 1.96E-35 | 8.738  | 0.737 | -3.567 | 0.001 | 0.133 | -0.133 | PPP6R3   | chr11:68363687-68367788:+   | chr11 |
| 2.54E-11 | 1.05E-08 | 5.779  | 1.995 | -1.535 | 0.014 | 0.146 | -0.132 | ELP2     | chr18:33724998-33725896:+   | chr18 |
| 1.38E-34 | 4.18E-31 | 6.606  | 0.090 | -6.204 | 0.000 | 0.132 | -0.132 | KPNA1    | chr3:122152653-122156016:-  | chr3  |
| 1.42E-21 | 1.70E-18 | 5.832  | 0.539 | -3.436 | 0.006 | 0.138 | -0.132 | SOS1     | chr2:39285969-39294768:-    | chr2  |
| 3.81E-16 | 2.70E-13 | 5.351  | 0.087 | -5.939 | 0.000 | 0.129 | -0.129 | SLC35A3  | chr1:100477090-100480840:+  | chr1  |
| 1.27E-25 | 2.10E-22 | 6.522  | 0.955 | -2.771 | 0.003 | 0.130 | -0.127 | DGCR2    | chr22:19044700-19050714:-   | chr22 |
| 1.05E-11 | 4.45E-09 | 4.985  | 0.072 | -6.108 | 0.000 | 0.126 | -0.126 | CCNYL1   | chr2:208607067-208611755:+  | chr2  |
| 5.38E-28 | 1.07E-24 | 6.925  | 1.098 | -2.656 | 0.003 | 0.128 | -0.125 | RTF1     | chr15:41762591-41763349:+   | chr15 |
| 4.18E-07 | 8.31E-05 | 3.818  | 1.009 | -1.920 | 0.016 | 0.141 | -0.125 | TEX30    | chr13:103422451-103426031:- | chr13 |
| 4.16E-07 | 8.29E-05 | 4.761  | 0.788 | -2.595 | 0.002 | 0.126 | -0.124 | CEP152   | chr15:49044681-49048099:-   | chr15 |
| 4.58E-06 | 0.00071  | 7.201  | 3.383 | -1.090 | 0.042 | 0.165 | -0.123 | NDST2    | chr10:75566590-75566865:-   | chr10 |
| 8.75E-22 | 1.09E-18 | 7.934  | 0.880 | -3.172 | 0.002 | 0.122 | -0.120 | GCLC     | chr6:53381039-53385575:-    | chr6  |
| 7.67E-24 | 1.14E-20 | 5.373  | 0.079 | -6.088 | 0.000 | 0.119 | -0.119 | SOAT1    | chr1:179318078-179319411:+  | chr1  |
| 0.00011  | 0.00963  | 4.374  | 0.077 | -5.819 | 0.000 | 0.117 | -0.117 | RAD18    | chr3:8923170-8932072:-      | chr3  |
| 0.00021  | 0.01639  | 6.791  | 2.195 | -1.630 | 0.015 | 0.129 | -0.114 | ZFAND5   | chr9:74978548-74979611:-    | chr9  |
| 1.24E-16 | 9.30E-14 | 8.319  | 1.320 | -2.655 | 0.003 | 0.113 | -0.110 | COP2     | chr15:49420971-49421673:-   | chr15 |
| 2.18E-16 | 1.59E-13 | 5.605  | 1.597 | -1.811 | 0.009 | 0.119 | -0.109 | PROSER1  | chr13:39605783-39608267:-   | chr13 |
| 1.79E-28 | 3.63E-25 | 7.072  | 1.444 | -2.292 | 0.006 | 0.115 | -0.109 | SYVN1    | chr11:64900741-64900940:-   | chr11 |
| 9.11E-40 | 4.43E-36 | 10.839 | 2.856 | -1.924 | 0.010 | 0.118 | -0.108 | SLC3A2   | chr11:62648920-62649352:+   | chr11 |
| 2.44E-05 | 0.00291  | 3.876  | 1.660 | -1.224 | 0.023 | 0.131 | -0.108 | ITSN1    | chr21:35140133-35144342:+   | chr21 |
| 0.00022  | 0.01656  | 3.924  | 2.066 | -0.925 | 0.034 | 0.141 | -0.106 | MITD1    | chr2:99788124-99789876:-    | chr2  |
| 3.01E-18 | 2.67E-15 | 5.895  | 1.726 | -1.772 | 0.010 | 0.115 | -0.106 | ITFG1    | chr16:47347748-47399698:-   | chr16 |
| 0.00027  | 0.01964  | 4.337  | 2.280 | -0.928 | 0.032 | 0.137 | -0.106 | SCMH1    | chr1:41579226-41582593:-    | chr1  |
| 1.50E-05 | 0.00193  | 9.736  | 5.831 | -0.739 | 0.055 | 0.160 | -0.105 | UBL7     | chr15:74740929-74741526:-   | chr15 |

|          |          |        |       |        |       |       |        |          |                             |       |
|----------|----------|--------|-------|--------|-------|-------|--------|----------|-----------------------------|-------|
| 6.51E-18 | 5.51E-15 | 5.550  | 0.973 | -2.512 | 0.005 | 0.110 | -0.104 | PFDN5    | chr12:53690336-53691607:+   | chr12 |
| 8.80E-13 | 4.25E-10 | 5.566  | 1.322 | -2.074 | 0.006 | 0.110 | -0.104 | CCDC84   | chr11:118883973-118885685:+ | chr11 |
| 4.13E-10 | 1.43E-07 | 4.695  | 0.551 | -3.090 | 0.002 | 0.106 | -0.104 | DUSP22   | chr6:348842-350802:+        | chr6  |
| 1.13E-15 | 7.51E-13 | 8.200  | 1.645 | -2.317 | 0.004 | 0.108 | -0.104 | YY1AP1   | chr1:155630725-155631097:-  | chr1  |
| 9.81E-28 | 1.85E-24 | 11.823 | 6.507 | -0.862 | 0.041 | 0.144 | -0.103 | PTPN7    | chr1:202122979-202123313:-  | chr1  |
| 3.72E-13 | 1.89E-10 | 7.744  | 1.117 | -2.793 | 0.003 | 0.106 | -0.103 | AKAP8    | chr19:15479151-15480956:-   | chr19 |
| 3.30E-24 | 4.96E-21 | 5.660  | 0.706 | -3.004 | 0.002 | 0.104 | -0.102 | TPR      | chr1:186324918-186325417:-  | chr1  |
| 1.03E-06 | 0.00019  | 4.418  | 1.555 | -1.506 | 0.014 | 0.116 | -0.102 | C10orf76 | chr10:103771555-103772589:- | chr10 |
| 0.00062  | 0.03651  | 8.932  | 6.679 | -0.419 | 0.093 | 0.193 | -0.100 | LYST     | chr1:235914679-235915304:-  | chr1  |
| 1.47E-05 | 0.0019   | 9.538  | 6.508 | -0.551 | 0.103 | 0.202 | -0.099 | KEL      | chr7:142651631-142654913:-  | chr7  |
| 1.46E-05 | 0.00189  | 4.060  | 1.880 | -1.110 | 0.062 | 0.160 | -0.099 | TRMT13   | chr1:100606071-100606400:+  | chr1  |
| 1.65E-08 | 4.46E-06 | 6.629  | 3.936 | -0.752 | 0.044 | 0.141 | -0.097 | ATF1     | chr12:51174022-51189680:+   | chr12 |
| 1.03E-05 | 0.00141  | 4.751  | 2.110 | -1.171 | 0.020 | 0.117 | -0.097 | DHX29    | chr5:54566334-54566405:-    | chr5  |
| 2.84E-08 | 7.31E-06 | 5.069  | 1.341 | -1.918 | 0.006 | 0.099 | -0.093 | SLC33A1  | chr3:155546181-155547476:-  | chr3  |
| 1.74E-10 | 6.42E-08 | 4.765  | 0.922 | -2.370 | 0.004 | 0.095 | -0.091 | TMEM94   | chr17:73486840-73487110:+   | chr17 |
| 0.00036  | 0.02453  | 7.057  | 2.684 | -1.394 | 0.013 | 0.103 | -0.089 | ADAM9    | chr8:38947708-38948761:+    | chr8  |
| 1.63E-07 | 3.58E-05 | 4.807  | 2.316 | -1.054 | 0.025 | 0.114 | -0.089 | ACD      | chr16:67692736-67692830:-   | chr16 |
| 9.26E-08 | 2.13E-05 | 11.487 | 8.730 | -0.396 | 0.124 | 0.211 | -0.088 | RGL2     | chr6:33261713-33261810:-    | chr6  |
| 1.10E-05 | 0.0015   | 6.767  | 3.371 | -1.005 | 0.028 | 0.115 | -0.087 | POLG     | chr15:89870311-89870397:-   | chr15 |
| 2.90E-20 | 3.09E-17 | 7.304  | 2.883 | -1.341 | 0.015 | 0.100 | -0.085 | TNIP1    | chr5:150411956-150413168:-  | chr5  |
| 2.15E-14 | 1.23E-11 | 4.953  | 1.162 | -2.091 | 0.005 | 0.089 | -0.084 | C15orf57 | chr15:40849590-40854970:-   | chr15 |
| 2.32E-22 | 3.09E-19 | 6.369  | 1.532 | -2.056 | 0.005 | 0.088 | -0.084 | PDS5A    | chr4:39911977-39915230:-    | chr4  |
| 5.36E-15 | 3.30E-12 | 5.525  | 0.913 | -2.597 | 0.003 | 0.085 | -0.082 | ULK3     | chr15:75131105-75131350:-   | chr15 |
| 1.66E-44 | 1.02E-40 | 9.041  | 2.070 | -2.127 | 0.004 | 0.086 | -0.082 | VPS51    | chr11:64877396-64877934:+   | chr11 |
| 5.85E-41 | 3.04E-37 | 16.602 | 5.712 | -1.539 | 0.010 | 0.091 | -0.081 | ITGAM    | chr16:31288371-31289273:+   | chr16 |
| 1.78E-10 | 6.54E-08 | 7.585  | 2.870 | -1.402 | 0.013 | 0.095 | -0.081 | NPLOC4   | chr17:79556146-79563141:-   | chr17 |
| 1.14E-10 | 4.30E-08 | 13.579 | 7.554 | -0.846 | 0.034 | 0.115 | -0.081 | GATA1    | chrX:48651705-48652184:+    | chrX  |
| 0.0001   | 0.00938  | 5.549  | 2.225 | -1.318 | 0.007 | 0.088 | -0.081 | ADAM9    | chr8:38899637-38911982:+    | chr8  |
| 7.98E-11 | 3.10E-08 | 4.698  | 1.100 | -2.094 | 0.002 | 0.083 | -0.080 | BAZ2B    | chr2:160253916-160255339:-  | chr2  |
| 4.71E-07 | 9.24E-05 | 7.511  | 4.416 | -0.766 | 0.110 | 0.190 | -0.080 | C20orf24 | chr20:35236222-35236271:+   | chr20 |
| 1.20E-14 | 7.09E-12 | 5.095  | 0.934 | -2.448 | 0.003 | 0.083 | -0.080 | RIOK1    | chr6:7404789-7405128:+      | chr6  |
| 4.20E-27 | 7.63E-24 | 6.699  | 1.478 | -2.181 | 0.004 | 0.084 | -0.080 | SNW1     | chr14:78203439-78205120:-   | chr14 |
| 6.50E-06 | 0.00096  | 4.024  | 1.815 | -1.148 | 0.027 | 0.106 | -0.079 | RASGRP2  | chr11:64494863-64496334:-   | chr11 |
| 2.82E-08 | 7.26E-06 | 4.284  | 1.442 | -1.571 | 0.010 | 0.089 | -0.079 | PDHX     | chr11:34953032-34969039:+   | chr11 |
| 9.38E-08 | 2.16E-05 | 5.747  | 2.599 | -1.145 | 0.014 | 0.093 | -0.078 | RPS6KA3  | chrX:20194635-20195113:-    | chrX  |
| 3.29E-05 | 0.00373  | 4.868  | 2.414 | -1.012 | 0.023 | 0.101 | -0.078 | ARHGAP19 | chr10:99025904-99052328:-   | chr10 |
| 3.08E-16 | 2.22E-13 | 6.925  | 1.549 | -2.161 | 0.004 | 0.082 | -0.078 | FKBP15   | chr9:115934003-115935732:-  | chr9  |
| 5.60E-31 | 1.36E-27 | 9.127  | 0.091 | -6.652 | 0.000 | 0.077 | -0.077 | ANPEP    | chr15:90342810-90344341:-   | chr15 |
| 1.07E-12 | 5.09E-10 | 4.376  | 0.096 | -5.517 | 0.000 | 0.077 | -0.077 | RAB4A    | chr1:229407118-229422214:+  | chr1  |
| 8.04E-17 | 6.21E-14 | 7.322  | 1.547 | -2.243 | 0.003 | 0.079 | -0.076 | LPCAT2   | chr16:55579730-55583167:+   | chr16 |
| 4.25E-15 | 2.65E-12 | 9.026  | 1.713 | -2.398 | 0.003 | 0.078 | -0.075 | STK24    | chr13:99127257-99127503:-   | chr13 |
| 1.39E-16 | 1.02E-13 | 5.244  | 0.667 | -2.974 | 0.001 | 0.075 | -0.074 | SLC27A3  | chr1:153751362-153751571:+  | chr1  |
| 2.11E-22 | 2.82E-19 | 6.924  | 1.052 | -2.719 | 0.001 | 0.074 | -0.073 | CKAP2    | chr13:53029762-53030637:+   | chr13 |
| 2.78E-07 | 5.77E-05 | 4.776  | 1.666 | -1.519 | 0.008 | 0.081 | -0.072 | RASA1    | chr5:86665718-86667916:+    | chr5  |
| 4.42E-12 | 1.95E-09 | 5.655  | 1.687 | -1.745 | 0.007 | 0.080 | -0.072 | TTK      | chr6:80750421-80751814:+    | chr6  |
| 9.46E-07 | 0.00018  | 6.352  | 3.971 | -0.677 | 0.041 | 0.114 | -0.072 | EDEM2    | chr20:33703762-33706400:-   | chr20 |
| 1.91E-07 | 4.12E-05 | 4.226  | 1.757 | -1.266 | 0.016 | 0.087 | -0.071 | FBXL19   | chr16:30958270-30958352:+   | chr16 |
| 1.70E-09 | 5.36E-07 | 4.797  | 1.716 | -1.483 | 0.006 | 0.077 | -0.071 | DDIT3    | chr12:57911243-57911488:-   | chr12 |
| 1.48E-07 | 3.27E-05 | 4.688  | 2.014 | -1.219 | 0.015 | 0.085 | -0.070 | CHTF8    | chr16:69155088-69155338:-   | chr16 |
| 8.05E-11 | 3.12E-08 | 4.588  | 0.978 | -2.230 | 0.002 | 0.072 | -0.070 | NCAPG    | chr4:17824747-17825253:+    | chr4  |
| 7.21E-16 | 4.89E-13 | 5.362  | 0.646 | -3.053 | 0.000 | 0.068 | -0.068 | CLEC3B   | chr3:45043101-45046767:+    | chr3  |
| 1.94E-13 | 1.03E-10 | 5.349  | 1.454 | -1.879 | 0.005 | 0.073 | -0.068 | MINK1    | chr17:4796064-4796240:+     | chr17 |
| 1.13E-08 | 3.15E-06 | 6.207  | 2.252 | -1.463 | 0.011 | 0.078 | -0.068 | DHX38    | chr16:72139524-72139882:+   | chr16 |
| 6.39E-06 | 0.00095  | 4.232  | 2.013 | -1.072 | 0.014 | 0.081 | -0.067 | TRRAP    | chr7:98579584-98580862:+    | chr7  |
| 1.35E-19 | 1.36E-16 | 6.915  | 1.565 | -2.144 | 0.004 | 0.071 | -0.067 | KTN1     | chr14:56100060-56101230:+   | chr14 |
| 2.60E-06 | 0.00043  | 9.416  | 5.975 | -0.656 | 0.033 | 0.100 | -0.066 | NAGK     | chr2:71299882-71300592:+    | chr2  |

|           |           |        |       |        |       |       |        |           |                             |       |
|-----------|-----------|--------|-------|--------|-------|-------|--------|-----------|-----------------------------|-------|
| 3.31E-05  | 0.00375   | 5.125  | 3.171 | -0.693 | 0.044 | 0.110 | -0.066 | ASUN      | chr12:27070393-27070576:-   | chr12 |
| 1.41E-06  | 0.00025   | 4.010  | 1.280 | -1.647 | 0.006 | 0.072 | -0.066 | MTOR      | chr1:11272544-11272852:-    | chr1  |
| 9.26E-06  | 0.0013    | 3.857  | 1.648 | -1.227 | 0.016 | 0.082 | -0.066 | ANKZF1    | chr2:220100035-220100182:+  | chr2  |
| 5.04E-05  | 0.00529   | 5.052  | 3.106 | -0.702 | 0.036 | 0.101 | -0.065 | KCTD9     | chr8:25290170-25290845:-    | chr8  |
| 3.00E-32  | 7.97E-29  | 19.137 | 3.962 | -2.272 | 0.002 | 0.066 | -0.064 | ANXA3     | chr4:79475643-79494320:+    | chr4  |
| 2.85E-12  | 1.28E-09  | 4.449  | 1.003 | -2.150 | 0.003 | 0.067 | -0.064 | ATPAF2    | chr17:17925187-17927937:-   | chr17 |
| 1.29E-16  | 9.55E-14  | 4.963  | 0.523 | -3.246 | 0.000 | 0.064 | -0.064 | PTPN11    | chr12:112915535-112915638:+ | chr12 |
| 1.22E-12  | 5.72E-10  | 6.393  | 2.498 | -1.356 | 0.010 | 0.073 | -0.063 | SUZ12     | chr17:30315517-30320247:+   | chr17 |
| 7.66E-07  | 0.00014   | 3.888  | 1.463 | -1.410 | 0.007 | 0.070 | -0.063 | CTNNAL1   | chr9:111741781-111745424:-  | chr9  |
| 1.40E-35  | 4.38E-32  | 7.096  | 0.785 | -3.175 | 0.001 | 0.063 | -0.063 | ACAA2     | chr18:47311743-47313660:-   | chr18 |
| 3.42E-27  | 6.25E-24  | 6.670  | 0.564 | -3.563 | 0.001 | 0.063 | -0.062 | ATF6B     | chr6:32095540-32095893:-    | chr6  |
| 3.42E-13  | 1.76E-10  | 7.685  | 1.803 | -2.092 | 0.004 | 0.066 | -0.062 | MRPS18C   | chr4:84378112-84379477:+    | chr4  |
| 9.58E-33  | 2.71E-29  | 8.486  | 0.557 | -3.929 | 0.000 | 0.062 | -0.061 | AKAP8L    | chr19:15491445-15507960:-   | chr19 |
| 4.91E-08  | 1.20E-05  | 4.901  | 0.952 | -2.365 | 0.002 | 0.064 | -0.061 | WDR34     | chr9:131398064-131398559:-  | chr9  |
| 2.34E-09  | 7.23E-07  | 4.757  | 1.529 | -1.638 | 0.007 | 0.068 | -0.061 | ANAPC2    | chr9:140069968-140070159:-  | chr9  |
| 6.88E-37  | 2.58E-33  | 13.475 | 2.350 | -2.520 | 0.002 | 0.062 | -0.061 | GUK1      | chr1:228335401-228336058:+  | chr1  |
| 7.15E-05  | 0.00703   | 4.877  | 1.892 | -1.366 | 0.013 | 0.073 | -0.061 | NAT10     | chr11:34161043-34161927:+   | chr11 |
| 0.00073   | 0.04079   | 5.071  | 0.862 | -2.557 | 0.002 | 0.062 | -0.060 | BUB1      | chr2:111417629-111419158:-  | chr2  |
| 3.52E-13  | 1.80E-10  | 4.659  | 1.059 | -2.138 | 0.004 | 0.064 | -0.060 | ZC3H7A    | chr16:11862969-11864638:-   | chr16 |
| 1.69E-10  | 6.24E-08  | 6.381  | 2.012 | -1.665 | 0.006 | 0.066 | -0.060 | DYNC1I2   | chr2:172584929-172585212:+  | chr2  |
| 6.57E-06  | 0.00097   | 4.269  | 1.196 | -1.835 | 0.003 | 0.062 | -0.060 | MYO19     | chr17:34854422-34854918:-   | chr17 |
| 4.99E-14  | 2.79E-11  | 5.297  | 0.074 | -6.168 | 0.000 | 0.060 | -0.060 | ATPAF1    | chr1:47108989-47110832:-    | chr1  |
| 2.41E-128 | 1.84E-123 | 62.469 | ##### | -0.352 | 0.031 | 0.090 | -0.059 | SI00A8    | chr1:153363051-153363516:-  | chr1  |
| 8.02E-22  | 1.01E-18  | 13.876 | 2.357 | -2.557 | 0.001 | 0.061 | -0.059 | ITGAM     | chr16:31338257-31339437:+   | chr16 |
| 7.99E-15  | 4.81E-12  | 5.845  | 1.413 | -2.049 | 0.004 | 0.063 | -0.059 | NUP98     | chr11:3697620-3697738:-     | chr11 |
| 4.08E-08  | 1.02E-05  | 4.522  | 1.752 | -1.368 | 0.012 | 0.071 | -0.059 | KIAA0319L | chr1:35917393-35919157:-    | chr1  |
| 2.40E-22  | 3.16E-19  | 6.261  | 0.089 | -6.135 | 0.000 | 0.058 | -0.058 | MRPS9     | chr2:105713783-105716106:+  | chr2  |
| 2.68E-39  | 1.25E-35  | 7.769  | 1.160 | -2.744 | 0.001 | 0.059 | -0.057 | SF3A2     | chr19:2247022-2247564:+     | chr19 |
| 1.29E-06  | 0.00023   | 5.287  | 1.361 | -1.958 | 0.006 | 0.063 | -0.057 | TTC3      | chr21:38570327-38572514:+   | chr21 |
| 2.95E-20  | 3.12E-17  | 6.709  | 1.935 | -1.794 | 0.005 | 0.062 | -0.057 | TPR       | chr1:186300729-186301326:-  | chr1  |
| 1.06E-21  | 1.31E-18  | 6.666  | 0.069 | -6.598 | 0.000 | 0.056 | -0.056 | TBC1D15   | chr12:72315235-72316743:+   | chr12 |
| 1.69E-31  | 4.35E-28  | 6.150  | 0.080 | -6.259 | 0.000 | 0.056 | -0.056 | DOCK8     | chr9:317129-325647:+        | chr9  |
| 2.44E-10  | 8.76E-08  | 4.307  | 0.107 | -5.337 | 0.000 | 0.055 | -0.055 | DENND4A   | chr15:65962545-65964129:-   | chr15 |
| 1.48E-13  | 7.98E-11  | 5.803  | 1.636 | -1.826 | 0.004 | 0.059 | -0.055 | PTPRJ     | chr11:48171551-48171633:+   | chr11 |
| 5.23E-45  | 3.63E-41  | 8.456  | 1.239 | -2.770 | 0.001 | 0.055 | -0.054 | REXO2     | chr11:114316810-114318499:+ | chr11 |
| 0.0001    | 0.0094    | 10.726 | 6.167 | -0.799 | 0.025 | 0.079 | -0.054 | TRABD     | chr22:50635781-50635865:+   | chr22 |
| 1.35E-26  | 2.33E-23  | 6.026  | 0.067 | -6.488 | 0.000 | 0.053 | -0.053 | TP53I11   | chr11:44957238-44958353:-   | chr11 |
| 0.00083   | 0.04478   | 5.195  | 3.015 | -0.785 | 0.026 | 0.079 | -0.053 | PPP6R2    | chr22:50832565-50845095:+   | chr22 |
| 1.38E-18  | 1.24E-15  | 5.084  | 0.772 | -2.720 | 0.001 | 0.054 | -0.053 | ATP6V1A   | chr3:113497683-113499879:+  | chr3  |
| 5.94E-13  | 2.96E-10  | 4.663  | 1.030 | -2.179 | 0.003 | 0.056 | -0.053 | PPP3CB    | chr10:75231388-75234676:-   | chr10 |
| 5.29E-06  | 0.0008    | 7.989  | 3.456 | -1.209 | 0.011 | 0.064 | -0.052 | CPSF1     | chr8:145624053-145624168:-  | chr8  |
| 1.53E-41  | 8.35E-38  | 10.453 | 1.425 | -2.875 | 0.001 | 0.053 | -0.052 | SRSF1     | chr17:56082979-56083161:-   | chr17 |
| 1.62E-10  | 6.03E-08  | 8.494  | 3.640 | -1.223 | 0.011 | 0.063 | -0.052 | RASAL3    | chr19:15565390-15565467:-   | chr19 |
| 9.38E-12  | 4.00E-09  | 7.564  | 1.870 | -2.016 | 0.003 | 0.054 | -0.052 | STK17B    | chr2:197004545-197005972:-  | chr2  |
| 2.72E-12  | 1.23E-09  | 6.146  | 2.527 | -1.282 | 0.010 | 0.061 | -0.051 | NFE2L2    | chr2:178096759-178097119:-  | chr2  |
| 7.33E-11  | 2.87E-08  | 4.075  | 0.607 | -2.747 | 0.001 | 0.052 | -0.050 | PIP5K1B   | chr9:71433462-71437514:+    | chr9  |
| 1.85E-10  | 6.76E-08  | 4.023  | 0.590 | -2.769 | 0.001 | 0.051 | -0.050 | FAM65C    | chr20:49225085-49225149:-   | chr20 |
| 2.52E-08  | 6.56E-06  | 4.545  | 0.751 | -2.598 | 0.002 | 0.052 | -0.050 | SCFD1     | chr14:31169465-31171484:+   | chr14 |
| 4.00E-07  | 8.03E-05  | 5.138  | 1.854 | -1.471 | 0.007 | 0.057 | -0.050 | AKAP10    | chr17:19812609-19813238:-   | chr17 |
| 4.84E-10  | 1.67E-07  | 7.127  | 3.431 | -1.055 | 0.014 | 0.064 | -0.050 | EIF3B     | chr7:2419147-2419815:+      | chr7  |
| 7.08E-11  | 2.78E-08  | 7.985  | 1.836 | -2.121 | 0.003 | 0.053 | -0.049 | DGKZ      | chr11:46389298-46389527:+   | chr11 |
| 2.71E-05  | 0.00318   | 4.193  | 2.192 | -0.936 | 0.018 | 0.067 | -0.049 | SCLT1     | chr4:129867320-129869650:-  | chr4  |
| 1.47E-31  | 3.81E-28  | 7.147  | 1.180 | -2.598 | 0.001 | 0.050 | -0.048 | BTK       | chrX:100630322-100641049:-  | chrX  |
| 4.71E-05  | 0.00501   | 5.233  | 1.728 | -1.599 | 0.006 | 0.054 | -0.048 | KIF5B     | chr10:32328377-32329311:-   | chr10 |
| 9.79E-09  | 2.76E-06  | 4.308  | 1.156 | -1.898 | 0.005 | 0.052 | -0.048 | HECTD3    | chr1:45474012-45474207:-    | chr1  |
| 6.59E-17  | 5.22E-14  | 6.227  | 0.804 | -2.954 | 0.001 | 0.049 | -0.048 | CUL4A     | chr13:113915074-113917776:+ | chr13 |

|          |          |        |       |        |       |       |        |            |                             |       |
|----------|----------|--------|-------|--------|-------|-------|--------|------------|-----------------------------|-------|
| 1.33E-32 | 3.61E-29 | 7.642  | 1.348 | -2.503 | 0.002 | 0.049 | -0.048 | NRD1       | chr1:52293559-52299688:-    | chr1  |
| 1.30E-21 | 1.56E-18 | 5.888  | 1.148 | -2.359 | 0.003 | 0.050 | -0.047 | CDC27      | chr17:45216273-45219218:-   | chr17 |
| 2.40E-08 | 6.28E-06 | 4.137  | 1.189 | -1.798 | 0.004 | 0.052 | -0.047 | AP5Z1      | chr7:4827408-4827743:+      | chr7  |
| 7.36E-10 | 2.46E-07 | 5.562  | 2.429 | -1.195 | 0.010 | 0.057 | -0.047 | ZMYM2      | chr13:20656271-20656905:+   | chr13 |
| 6.37E-07 | 0.00012  | 5.118  | 1.231 | -2.056 | 0.004 | 0.051 | -0.047 | KDM3A      | chr2:86705389-86705705:+    | chr2  |
| 1.85E-05 | 0.0023   | 5.062  | 2.967 | -0.771 | 0.033 | 0.080 | -0.047 | UCKL1      | chr20:62577342-62577513:-   | chr20 |
| 1.30E-07 | 2.90E-05 | 4.177  | 1.239 | -1.753 | 0.004 | 0.050 | -0.047 | MAVS       | chr20:3845436-3846309:+     | chr20 |
| 5.01E-08 | 1.22E-05 | 4.117  | 1.539 | -1.420 | 0.006 | 0.052 | -0.046 | HCFC1      | chrX:153229751-153230028:-  | chrX  |
| 1.74E-36 | 6.31E-33 | 7.535  | 1.226 | -2.620 | 0.001 | 0.047 | -0.046 | PAK1       | chr11:77090455-77090938:-   | chr11 |
| 1.34E-12 | 6.25E-10 | 4.650  | 0.098 | -5.563 | 0.000 | 0.045 | -0.045 | SVIL       | chr10:29756819-29759204:-   | chr10 |
| 1.12E-12 | 5.31E-10 | 4.429  | 0.749 | -2.564 | 0.002 | 0.047 | -0.045 | ZMIZ2      | chr7:44795899-44796008:+    | chr7  |
| 3.93E-08 | 9.84E-06 | 3.938  | 1.245 | -1.661 | 0.005 | 0.048 | -0.044 | PDXDC1     | chr16:15129411-15129852:+   | chr16 |
| 7.59E-15 | 4.58E-12 | 5.799  | 1.941 | -1.579 | 0.005 | 0.048 | -0.043 | GAK        | chr4:844890-845537:-        | chr4  |
| 0.00039  | 0.02613  | 4.158  | 1.650 | -1.334 | 0.008 | 0.051 | -0.043 | CREB1      | chr2:208425097-208432169:+  | chr2  |
| 3.74E-22 | 4.80E-19 | 6.618  | 1.127 | -2.554 | 0.001 | 0.044 | -0.043 | GPS1       | chr17:80013702-80013861:+   | chr17 |
| 1.01E-58 | 1.53E-54 | 26.081 | 9.022 | -1.532 | 0.004 | 0.047 | -0.043 | LRRC75A-AS | chr17:16344445-16344670:+   | chr17 |
| 1.75E-26 | 2.99E-23 | 6.339  | 0.785 | -3.014 | 0.001 | 0.043 | -0.043 | CLASRP     | chr19:45572507-45573243:+   | chr19 |
| 2.32E-36 | 8.15E-33 | 9.092  | 1.233 | -2.882 | 0.001 | 0.043 | -0.042 | PSTPIP1    | chr15:77317660-77317818:+   | chr15 |
| 8.10E-13 | 3.97E-10 | 4.833  | 1.330 | -1.861 | 0.004 | 0.046 | -0.042 | SLC11A1    | chr2:219257854-219258817:+  | chr2  |
| 2.32E-10 | 8.37E-08 | 6.241  | 1.346 | -2.213 | 0.002 | 0.044 | -0.042 | CRLF3      | chr17:29124438-29130918:-   | chr17 |
| 7.06E-36 | 2.34E-32 | 8.401  | 2.218 | -1.922 | 0.008 | 0.050 | -0.041 | FBXW5      | chr9:139837450-139837800:-  | chr9  |
| 2.26E-10 | 8.18E-08 | 6.743  | 3.714 | -0.860 | 0.019 | 0.061 | -0.041 | NADSYN1    | chr11:71174532-71175078:+   | chr11 |
| 4.63E-09 | 1.37E-06 | 4.794  | 1.553 | -1.626 | 0.005 | 0.045 | -0.041 | CUL1       | chr7:148451243-148454059:+  | chr7  |
| 1.54E-48 | 1.41E-44 | 11.070 | 1.792 | -2.627 | 0.001 | 0.041 | -0.040 | NONO       | chrX:70516898-70517210:+    | chrX  |
| 1.45E-10 | 5.43E-08 | 4.204  | 1.126 | -1.900 | 0.003 | 0.042 | -0.040 | ZRANB1     | chr10:126660688-126662195:+ | chr10 |
| 1.06E-20 | 1.16E-17 | 6.533  | 0.445 | -3.877 | 0.000 | 0.040 | -0.039 | DOCK8      | chr9:432325-433857:+        | chr9  |
| 6.61E-11 | 2.61E-08 | 4.545  | 1.469 | -1.630 | 0.004 | 0.043 | -0.039 | NCOR1      | chr17:15967517-15968183:-   | chr17 |
| 0.00015  | 0.0125   | 4.051  | 1.927 | -1.072 | 0.009 | 0.047 | -0.038 | FEZ2       | chr2:36780340-36782825:-    | chr2  |
| 8.54E-11 | 3.29E-08 | 4.686  | 1.292 | -1.859 | 0.003 | 0.042 | -0.038 | TBPL1      | chr6:134301399-134303688:+  | chr6  |
| 0.00013  | 0.0116   | 4.747  | 2.708 | -0.810 | 0.017 | 0.055 | -0.038 | PHYKPL     | chr5:177649600-177649852:-  | chr5  |
| 3.79E-42 | 2.12E-38 | 11.494 | 2.260 | -2.346 | 0.002 | 0.040 | -0.038 | ITGAM      | chr16:31284840-31286849:+   | chr16 |
| 1.61E-16 | 1.18E-13 | 5.085  | 0.961 | -2.403 | 0.002 | 0.040 | -0.038 | MAN1A1     | chr6:119511061-119514941:-  | chr6  |
| 2.08E-19 | 2.00E-16 | 25.464 | 3.529 | -2.851 | 0.001 | 0.039 | -0.038 | RPL24      | chr3:101401354-101401614:-  | chr3  |
| 2.13E-06 | 0.00036  | 4.255  | 1.736 | -1.293 | 0.007 | 0.045 | -0.038 | PPP1R12A   | chr12:80200133-80201005:-   | chr12 |
| 1.81E-19 | 1.76E-16 | 6.944  | 1.411 | -2.299 | 0.001 | 0.039 | -0.037 | NHP2       | chr5:177576860-177577888:-  | chr5  |
| 2.17E-28 | 4.35E-25 | 9.633  | 2.498 | -1.947 | 0.003 | 0.040 | -0.037 | HADHA      | chr2:26437446-26437921:-    | chr2  |
| 1.38E-10 | 5.19E-08 | 4.437  | 1.316 | -1.753 | 0.003 | 0.040 | -0.037 | GTF2F2     | chr13:45841512-45857556:+   | chr13 |
| 5.77E-31 | 1.39E-27 | 8.525  | 2.917 | -1.547 | 0.004 | 0.041 | -0.036 | OS9        | chr12:58109977-58110164:+   | chr12 |
| 9.94E-21 | 1.10E-17 | 6.545  | 2.100 | -1.640 | 0.004 | 0.040 | -0.036 | MCM3AP     | chr21:47655361-47656742:-   | chr21 |
| 4.15E-06 | 0.00065  | 4.109  | 1.811 | -1.182 | 0.009 | 0.045 | -0.036 | CDC27      | chr17:45234507-45234595:-   | chr17 |
| 5.68E-19 | 5.28E-16 | 5.610  | 1.014 | -2.468 | 0.001 | 0.037 | -0.036 | LRPPRC     | chr2:44145291-44145394:-    | chr2  |
| 3.90E-11 | 1.58E-08 | 4.397  | 0.773 | -2.508 | 0.001 | 0.036 | -0.035 | TRAPPC10   | chr21:45457809-45472142:+   | chr21 |
| 4.21E-08 | 1.04E-05 | 5.376  | 2.604 | -1.046 | 0.010 | 0.045 | -0.035 | CYLD       | chr16:50813956-50815142:+   | chr16 |
| 1.80E-05 | 0.00225  | 6.188  | 3.528 | -0.811 | 0.017 | 0.052 | -0.035 | FAM76B     | chr11:95513113-95516228:-   | chr11 |
| 4.91E-18 | 4.24E-15 | 5.785  | 0.936 | -2.627 | 0.001 | 0.036 | -0.035 | PNPLA6     | chr19:7625651-7625886:+     | chr19 |
| 1.15E-07 | 2.60E-05 | 5.049  | 0.737 | -2.776 | 0.001 | 0.035 | -0.035 | NT5C3A     | chr7:33055500-33057050:-    | chr7  |
| 2.24E-10 | 8.14E-08 | 3.997  | 0.854 | -2.226 | 0.001 | 0.036 | -0.035 | MRPS27     | chr5:71524211-71528269:-    | chr5  |
| 5.56E-08 | 1.34E-05 | 6.767  | 3.451 | -0.972 | 0.015 | 0.050 | -0.035 | MBOAT2     | chr2:9004381-9008575:-      | chr2  |
| 2.81E-05 | 0.00328  | 4.902  | 2.317 | -1.081 | 0.010 | 0.044 | -0.034 | MMS19      | chr10:99219517-99219802:-   | chr10 |
| 2.30E-21 | 2.67E-18 | 6.589  | 1.063 | -2.631 | 0.001 | 0.034 | -0.033 | LRRC75A-AS | chr17:16343568-16344670:+   | chr17 |
| 3.93E-13 | 1.98E-10 | 4.391  | 0.590 | -2.897 | 0.001 | 0.033 | -0.032 | TCERG1     | chr5:145883103-145883371:+  | chr5  |
| 4.60E-05 | 0.00492  | 8.614  | 5.780 | -0.576 | 0.022 | 0.053 | -0.032 | USP15      | chr12:62783480-62783562:+   | chr12 |
| 3.32E-13 | 1.72E-10 | 5.857  | 2.268 | -1.369 | 0.005 | 0.037 | -0.032 | MYB        | chr6:135507159-135508950:+  | chr6  |
| 8.88E-28 | 1.71E-24 | 7.008  | 1.518 | -2.207 | 0.002 | 0.033 | -0.031 | NBEAL2     | chr3:47042670-47042740:+    | chr3  |
| 7.08E-17 | 5.56E-14 | 6.850  | 0.912 | -2.908 | 0.000 | 0.032 | -0.031 | GSDMD      | chr8:144643999-144644083:+  | chr8  |
| 0.00026  | 0.01907  | 9.459  | 0.794 | -3.574 | 0.000 | 0.031 | -0.031 | SF3B1      | chr2:198267784-198268308:-  | chr2  |



|          |          |        |       |        |       |       |        |          |                             |       |
|----------|----------|--------|-------|--------|-------|-------|--------|----------|-----------------------------|-------|
| 1.09E-14 | 6.46E-12 | 5.231  | 0.984 | -2.411 | 0.001 | 0.032 | -0.031 | SAP30BP  | chr17:73689563-73695838:+   | chr17 |
| 5.08E-05 | 0.00533  | 3.750  | 1.709 | -1.134 | 0.008 | 0.039 | -0.030 | ANAPC2   | chr9:140074996-140075239:-  | chr9  |
| 2.67E-13 | 1.40E-10 | 5.042  | 0.721 | -2.806 | 0.001 | 0.031 | -0.030 | UBXN11   | chr1:26609461-26610632:-    | chr1  |
| 3.61E-36 | 1.23E-32 | 10.070 | 1.326 | -2.925 | 0.001 | 0.031 | -0.030 | CD36     | chr7:80301357-80302070:+    | chr7  |
| 2.44E-17 | 2.03E-14 | 7.606  | 2.609 | -1.544 | 0.004 | 0.034 | -0.030 | HIF1A    | chr14:62207907-62211405:+   | chr14 |
| 5.01E-07 | 9.77E-05 | 4.249  | 1.610 | -1.400 | 0.006 | 0.036 | -0.030 | CAPRIN2  | chr12:30888157-30893953:-   | chr12 |
| 6.51E-30 | 1.42E-26 | 11.055 | 2.499 | -2.145 | 0.001 | 0.030 | -0.029 | GPX1     | chr3:49395200-49395459:-    | chr3  |
| 6.61E-06 | 0.00097  | 4.412  | 1.571 | -1.489 | 0.006 | 0.035 | -0.029 | KIAA0100 | chr17:26969116-26969292:-   | chr17 |
| 0.00046  | 0.02943  | 5.136  | 3.216 | -0.675 | 0.015 | 0.044 | -0.029 | RBCK1    | chr20:409234-409571:+       | chr20 |
| 2.27E-07 | 4.79E-05 | 6.741  | 4.221 | -0.675 | 0.021 | 0.050 | -0.029 | RGL2     | chr6:33261105-33261189:-    | chr6  |
| 0.00038  | 0.02554  | 4.188  | 2.522 | -0.732 | 0.014 | 0.042 | -0.029 | KDM7A    | chr7:139796876-139797344:-  | chr7  |
| 3.02E-07 | 6.21E-05 | 5.707  | 2.537 | -1.169 | 0.007 | 0.036 | -0.028 | DCK      | chr4:71888278-71889263:+    | chr4  |
| 1.01E-23 | 1.47E-20 | 5.846  | 0.767 | -2.930 | 0.000 | 0.029 | -0.028 | HIGD2A   | chr5:175815975-175816311:+  | chr5  |
| 5.38E-05 | 0.00559  | 12.907 | 9.106 | -0.503 | 0.030 | 0.058 | -0.028 | AP2S1    | chr19:47342878-47349249:-   | chr19 |
| 5.91E-06 | 0.00088  | 5.352  | 2.932 | -0.868 | 0.008 | 0.036 | -0.028 | STK38    | chr6:36466281-36467649:-    | chr6  |
| 2.90E-13 | 1.51E-10 | 5.870  | 1.179 | -2.315 | 0.001 | 0.029 | -0.028 | IARS     | chr9:95007368-95009658:-    | chr9  |
| 0.00036  | 0.02444  | 4.250  | 1.480 | -1.522 | 0.005 | 0.032 | -0.027 | MITD1    | chr2:99788124-99790377:-    | chr2  |
| 0.00089  | 0.04753  | 20.160 | ##### | -0.515 | 0.633 | 0.660 | -0.027 | LYST     | chr1:235992340-235993525:-  | chr1  |
| 1.28E-15 | 8.38E-13 | 4.669  | 0.575 | -3.021 | 0.000 | 0.027 | -0.027 | MBD4     | chr3:129156809-129158572:-  | chr3  |
| 4.43E-06 | 0.00069  | 3.878  | 1.713 | -1.179 | 0.005 | 0.032 | -0.027 | MRPL40   | chr22:19422418-19423149:+   | chr22 |
| 1.84E-18 | 1.64E-15 | 5.600  | 1.345 | -2.057 | 0.001 | 0.028 | -0.027 | ARAP1    | chr11:72404529-72404736:-   | chr11 |
| 3.99E-05 | 0.00439  | 3.760  | 1.719 | -1.129 | 0.006 | 0.033 | -0.027 | GNPTG    | chr16:1402308-1411695:+     | chr16 |
| 4.06E-07 | 8.13E-05 | 10.604 | 7.114 | -0.576 | 0.016 | 0.043 | -0.026 | FMNL1    | chr17:43322784-43322985:+   | chr17 |
| 0.00011  | 0.00966  | 4.651  | 0.103 | -5.492 | 0.000 | 0.026 | -0.026 | MRPL3    | chr3:131181738-131186934:-  | chr3  |
| 7.12E-10 | 2.39E-07 | 5.365  | 2.139 | -1.327 | 0.004 | 0.031 | -0.026 | SMARCD2  | chr17:61910804-61910946:-   | chr17 |
| 0.00043  | 0.02767  | 3.796  | 1.784 | -1.090 | 0.015 | 0.041 | -0.026 | PBRM1    | chr3:52692359-52696148:-    | chr3  |
| 4.88E-05 | 0.00515  | 4.288  | 1.785 | -1.264 | 0.005 | 0.031 | -0.026 | CUL4A    | chr13:113864403-113873243:+ | chr13 |
| 1.23E-15 | 8.07E-13 | 5.460  | 1.044 | -2.387 | 0.001 | 0.026 | -0.026 | MBOAT2   | chr2:9048865-9083315:-      | chr2  |
| 1.67E-06 | 0.00029  | 4.001  | 1.515 | -1.401 | 0.003 | 0.029 | -0.025 | EIF4G3   | chr1:21137396-21139650:-    | chr1  |
| 1.05E-07 | 2.40E-05 | 4.248  | 1.315 | -1.692 | 0.002 | 0.027 | -0.025 | CA1      | chr8:86250389-86250480:-    | chr8  |
| 1.96E-07 | 4.20E-05 | 4.662  | 1.024 | -2.187 | 0.002 | 0.026 | -0.024 | CDK2     | chr12:56361954-56362539:+   | chr12 |
| 1.29E-16 | 9.55E-14 | 6.464  | 1.674 | -1.949 | 0.002 | 0.025 | -0.023 | ITGA4    | chr2:182395377-182396362:+  | chr2  |
| 5.87E-05 | 0.006    | 4.300  | 1.181 | -1.864 | 0.002 | 0.025 | -0.023 | STARD3   | chr17:37816527-37816662:+   | chr17 |
| 0.00024  | 0.01794  | 3.645  | 1.635 | -1.156 | 0.005 | 0.028 | -0.023 | BRIX1    | chr5:34922393-34922624:+    | chr5  |
| 1.97E-06 | 0.00034  | 6.839  | 4.068 | -0.750 | 0.010 | 0.033 | -0.023 | MYO1G    | chr7:45003777-45004013:-    | chr7  |
| 4.76E-15 | 2.93E-12 | 6.635  | 1.381 | -2.264 | 0.001 | 0.024 | -0.023 | PFDN5    | chr12:53689424-53691607:+   | chr12 |
| 1.71E-19 | 1.68E-16 | 5.217  | 0.559 | -3.223 | 0.000 | 0.023 | -0.022 | NOP58    | chr2:203160561-203162080:+  | chr2  |
| 6.46E-11 | 2.56E-08 | 4.563  | 1.370 | -1.736 | 0.002 | 0.024 | -0.022 | TIMM17B  | chrX:48751115-48751182:-    | chrX  |
| 0.00022  | 0.01665  | 4.294  | 2.085 | -1.042 | 0.006 | 0.028 | -0.022 | SEC63    | chr6:108225945-108227651:-  | chr6  |
| 4.41E-06 | 0.00069  | 5.864  | 3.656 | -0.682 | 0.014 | 0.035 | -0.021 | AKT2     | chr19:40746029-40747844:-   | chr19 |
| 9.00E-11 | 3.45E-08 | 8.371  | 2.457 | -1.768 | 0.001 | 0.022 | -0.021 | CHI3L1   | chr1:203154527-203155443:-  | chr1  |
| 1.35E-13 | 7.31E-11 | 4.035  | 0.094 | -5.427 | 0.000 | 0.021 | -0.021 | PCNP     | chr3:101293124-101298615:+  | chr3  |
| 3.42E-10 | 1.19E-07 | 4.296  | 0.833 | -2.366 | 0.001 | 0.021 | -0.020 | CD163    | chr12:7648016-7649408:-     | chr12 |
| 2.45E-07 | 5.13E-05 | 4.551  | 1.512 | -1.590 | 0.002 | 0.022 | -0.020 | HSPA4    | chr5:132439719-132439902:+  | chr5  |
| 1.46E-20 | 1.59E-17 | 6.200  | 1.400 | -2.147 | 0.001 | 0.021 | -0.020 | UBA1     | chrX:47065513-47065623:+    | chrX  |
| 1.49E-15 | 9.66E-13 | 5.946  | 1.352 | -2.137 | 0.001 | 0.021 | -0.020 | SYF2     | chr1:25554745-25555488:-    | chr1  |
| 9.40E-16 | 6.27E-13 | 4.976  | 1.079 | -2.205 | 0.001 | 0.021 | -0.020 | NUDT3    | chr6:34256733-34261227:-    | chr6  |
| 7.46E-06 | 0.00108  | 4.377  | 1.749 | -1.324 | 0.004 | 0.024 | -0.020 | HACD4    | chr9:21026765-21029293:-    | chr9  |
| 0.00035  | 0.02366  | 3.995  | 1.735 | -1.203 | 0.005 | 0.025 | -0.020 | MYCBP2   | chr13:77640242-77641715:-   | chr13 |
| 0.00021  | 0.01637  | 4.428  | 1.214 | -1.866 | 0.001 | 0.021 | -0.020 | PRPF3    | chr1:150318968-150321619:+  | chr1  |
| 2.37E-10 | 8.53E-08 | 5.848  | 2.083 | -1.489 | 0.002 | 0.022 | -0.019 | ABTB1    | chr3:127395425-127395783:+  | chr3  |
| 0.00014  | 0.01214  | 4.644  | 1.903 | -1.287 | 0.004 | 0.023 | -0.019 | CCNA2    | chr4:122740084-122740526:-  | chr4  |
| 7.70E-12 | 3.31E-09 | 9.486  | 5.003 | -0.923 | 0.008 | 0.027 | -0.019 | FERMT3   | chr11:63979220-63986701:+   | chr11 |
| 1.23E-09 | 3.97E-07 | 3.975  | 0.108 | -5.207 | 0.000 | 0.019 | -0.019 | TMEM57   | chr1:25815785-25817874:+    | chr1  |
| 7.98E-13 | 3.93E-10 | 6.006  | 1.554 | -1.950 | 0.001 | 0.020 | -0.019 | MGST3    | chr1:165619202-165620230:+  | chr1  |
| 0.00037  | 0.02499  | 4.107  | 2.436 | -0.754 | 0.008 | 0.027 | -0.018 | ARL2BP   | chr16:57283765-57284303:+   | chr16 |

|          |          |        |       |        |       |       |        |           |                             |       |
|----------|----------|--------|-------|--------|-------|-------|--------|-----------|-----------------------------|-------|
| 8.76E-24 | 1.29E-20 | 17.901 | 4.508 | -1.989 | 0.001 | 0.020 | -0.018 | MNDA      | chr1:158815794-158817490:+  | chr1  |
| 2.96E-05 | 0.00342  | 4.076  | 1.395 | -1.547 | 0.003 | 0.021 | -0.018 | SUPT16H   | chr14:21825540-21826085:-   | chr14 |
| 6.68E-16 | 4.57E-13 | 4.764  | 0.070 | -6.081 | 0.000 | 0.018 | -0.018 | PTK2B     | chr8:27279901-27287574:+    | chr8  |
| 7.16E-10 | 2.40E-07 | 9.034  | 4.291 | -1.074 | 0.005 | 0.023 | -0.018 | PTP4A2    | chr1:32377443-32381495:-    | chr1  |
| 0.00013  | 0.01095  | 4.403  | 1.752 | -1.330 | 0.003 | 0.020 | -0.018 | XPO1      | chr2:61721245-61722589:-    | chr2  |
| 4.77E-05 | 0.00506  | 5.032  | 1.534 | -1.714 | 0.001 | 0.019 | -0.017 | MYO1G     | chr7:45004146-45004543:-    | chr7  |
| 0.00036  | 0.02448  | 4.987  | 2.319 | -1.104 | 0.005 | 0.022 | -0.017 | SEC22B    | chr1:145109685-145112354:+  | chr1  |
| 3.40E-10 | 1.19E-07 | 4.828  | 0.069 | -6.139 | 0.000 | 0.017 | -0.017 | ZNF207    | chr17:30692507-30694775:+   | chr17 |
| 2.81E-12 | 1.27E-09 | 4.799  | 0.070 | -6.099 | 0.000 | 0.017 | -0.017 | ADD1      | chr4:2877838-2883603:+      | chr4  |
| 0.0003   | 0.0214   | 3.855  | 1.939 | -0.991 | 0.011 | 0.028 | -0.016 | IMMT      | chr2:86398460-86400772:-    | chr2  |
| 3.18E-20 | 3.33E-17 | 9.656  | 2.015 | -2.261 | 0.000 | 0.017 | -0.016 | TFRC      | chr3:195782191-195785154:-  | chr3  |
| 4.89E-08 | 1.19E-05 | 4.389  | 1.610 | -1.447 | 0.002 | 0.018 | -0.016 | TMEM63A   | chr1:226043662-226044352:-  | chr1  |
| 0.00014  | 0.01223  | 5.043  | 2.201 | -1.196 | 0.004 | 0.020 | -0.016 | CLINT1    | chr5:157240265-157241192:-  | chr5  |
| 1.87E-25 | 3.04E-22 | 8.175  | 0.063 | -7.022 | 0.000 | 0.014 | -0.014 | TFRC      | chr3:195799040-195800800:-  | chr3  |
| 5.23E-05 | 0.00546  | 5.226  | 3.060 | -0.772 | 0.007 | 0.021 | -0.014 | MAF1      | chr8:145161867-145161963:+  | chr8  |
| 2.78E-07 | 5.77E-05 | 5.448  | 0.545 | -3.322 | 0.000 | 0.014 | -0.013 | SPG21     | chr15:65262578-65266939:-   | chr15 |
| 4.60E-05 | 0.00492  | 10.180 | 8.340 | -0.288 | 0.025 | 0.039 | -0.013 | CD36      | chr7:80290527-80292288:+    | chr7  |
| 1.76E-19 | 1.73E-16 | 5.787  | 1.054 | -2.457 | 0.001 | 0.013 | -0.013 | CCT2      | chr12:69992202-69993621:+   | chr12 |
| 1.75E-05 | 0.00219  | 4.090  | 1.730 | -1.241 | 0.002 | 0.013 | -0.011 | FDPS      | chr1:155282187-155287710:+  | chr1  |
| 8.52E-06 | 0.00121  | 4.488  | 1.194 | -1.911 | 0.001 | 0.012 | -0.011 | UFC1      | chr1:161127108-161127388:+  | chr1  |
| 1.34E-10 | 5.05E-08 | 4.312  | 1.165 | -1.888 | 0.001 | 0.012 | -0.011 | SLTM      | chr15:59185284-59185477:-   | chr15 |
| 0.00034  | 0.02317  | 3.832  | 1.709 | -1.165 | 0.003 | 0.013 | -0.011 | TM9SF3    | chr10:98303980-98307651:-   | chr10 |
| 7.27E-08 | 1.70E-05 | 4.842  | 2.093 | -1.210 | 0.002 | 0.013 | -0.011 | DEK       | chr6:18256699-18258183:-    | chr6  |
| 1.73E-09 | 5.43E-07 | 4.184  | 0.075 | -5.808 | 0.000 | 0.010 | -0.010 | PTTG1     | chr5:159849411-159849702:+  | chr5  |
| 6.27E-10 | 2.12E-07 | 4.396  | 1.141 | -1.946 | 0.001 | 0.011 | -0.010 | CNPY3     | chr6:42902337-42903274:+    | chr6  |
| 6.55E-12 | 2.86E-09 | 5.790  | 0.593 | -3.288 | 0.000 | 0.010 | -0.009 | SERBP1    | chr1:67891987-67895670:-    | chr1  |
| 1.00E-10 | 3.83E-08 | 4.943  | 1.720 | -1.523 | 0.001 | 0.010 | -0.009 | ATP5C1    | chr10:7841158-7841707:+     | chr10 |
| 4.59E-07 | 9.05E-05 | 4.217  | 1.430 | -1.560 | 0.002 | 0.011 | -0.009 | CDC20     | chr1:43826917-43827852:+    | chr1  |
| 6.42E-19 | 5.89E-16 | 5.834  | 0.781 | -2.901 | 0.000 | 0.009 | -0.009 | PSMA7     | chr20:60712019-60712419:-   | chr20 |
| 6.54E-08 | 1.55E-05 | 5.467  | 2.432 | -1.169 | 0.002 | 0.011 | -0.008 | CCT5      | chr5:10263427-10264749:+    | chr5  |
| 1.57E-09 | 4.99E-07 | 4.478  | 0.543 | -3.044 | 0.000 | 0.008 | -0.008 | ATP6V1G1  | chr9:117350201-117354812:+  | chr9  |
| 2.90E-20 | 3.09E-17 | 8.545  | 2.317 | -1.883 | 0.001 | 0.009 | -0.008 | HNRNPK    | chr9:86593214-86593287:-    | chr9  |
| 2.13E-11 | 8.86E-09 | 7.141  | 2.304 | -1.632 | 0.001 | 0.008 | -0.008 | PGD       | chr1:10477175-10477412:+    | chr1  |
| 2.15E-38 | 8.80E-35 | 24.571 | 5.144 | -2.256 | 0.000 | 0.008 | -0.008 | TPT1      | chr13:45911539-45912794:-   | chr13 |
| 7.23E-06 | 0.00105  | 5.120  | 2.692 | -0.928 | 0.003 | 0.011 | -0.008 | EIF4A2    | chr3:186505672-186506080:+  | chr3  |
| 1.57E-28 | 3.23E-25 | 6.913  | 1.488 | -2.216 | 0.000 | 0.008 | -0.007 | TXN       | chr9:113013761-113018691:-  | chr9  |
| 2.22E-06 | 0.00038  | 4.601  | 1.012 | -2.184 | 0.001 | 0.008 | -0.007 | CAPG      | chr2:85622106-85622660:-    | chr2  |
| 2.34E-22 | 3.09E-19 | 7.435  | 2.018 | -1.882 | 0.000 | 0.008 | -0.007 | LSP1      | chr11:1905255-1905482:+     | chr11 |
| 1.55E-35 | 4.78E-32 | 16.126 | 3.283 | -2.296 | 0.000 | 0.007 | -0.007 | RPL27A    | chr11:8704813-8705536:+     | chr11 |
| 1.94E-07 | 4.16E-05 | 4.128  | 1.059 | -1.963 | 0.000 | 0.007 | -0.007 | CCT6A     | chr7:56129543-56130358:+    | chr7  |
| 0.00082  | 0.04444  | 3.736  | 1.791 | -1.061 | 0.002 | 0.009 | -0.007 | RAB1A     | chr2:65316225-65318116:-    | chr2  |
| 8.45E-05 | 0.00807  | 7.786  | 5.618 | -0.471 | 0.005 | 0.012 | -0.007 | PADI4     | chr1:17682623-17682836:+    | chr1  |
| 2.33E-12 | 1.06E-09 | 7.650  | 1.703 | -2.167 | 0.000 | 0.007 | -0.007 | HNRNPA2B1 | chr7:26233331-26235466:-    | chr7  |
| 9.72E-12 | 4.14E-09 | 6.327  | 2.054 | -1.623 | 0.002 | 0.008 | -0.007 | TSPO      | chr22:43547611-43555197:+   | chr22 |
| 1.52E-09 | 4.85E-07 | 5.942  | 2.640 | -1.170 | 0.002 | 0.008 | -0.007 | EIF4B     | chr12:53421973-53427574:+   | chr12 |
| 5.45E-08 | 1.31E-05 | 5.074  | 2.505 | -1.018 | 0.002 | 0.009 | -0.006 | PSMB1     | chr6:170844510-170846321:-  | chr6  |
| 6.25E-06 | 0.00093  | 3.962  | 1.482 | -1.418 | 0.001 | 0.007 | -0.006 | TAF15     | chr17:34147442-34149625:+   | chr17 |
| 1.67E-38 | 7.09E-35 | 16.528 | 5.743 | -1.525 | 0.001 | 0.006 | -0.006 | RPS27A    | chr2:55462099-55462545:+    | chr2  |
| 4.39E-09 | 1.30E-06 | 6.198  | 1.571 | -1.980 | 0.000 | 0.006 | -0.005 | PADI4     | chr1:17657645-17660419:+    | chr1  |
| 1.53E-07 | 3.38E-05 | 7.660  | 5.072 | -0.595 | 0.005 | 0.011 | -0.005 | RPL15     | chr3:23958665-23959327:+    | chr3  |
| 5.91E-08 | 1.41E-05 | 4.221  | 1.164 | -1.858 | 0.000 | 0.006 | -0.005 | PA2G4     | chr12:56503078-56503622:+   | chr12 |
| 0.00055  | 0.03344  | 3.767  | 1.835 | -1.037 | 0.002 | 0.007 | -0.005 | NASP      | chr1:46082376-46083113:+    | chr1  |
| 1.56E-09 | 4.96E-07 | 4.032  | 1.133 | -1.831 | 0.000 | 0.006 | -0.005 | ALOX5     | chr10:45924213-45935847:+   | chr10 |
| 0.00038  | 0.02543  | 4.241  | 1.118 | -1.924 | 0.001 | 0.005 | -0.005 | ERP29     | chr12:112451414-112457543:+ | chr12 |
| 4.78E-05 | 0.00507  | 4.342  | 1.915 | -1.181 | 0.001 | 0.006 | -0.005 | GSTK1     | chr7:142961770-142962038:+  | chr7  |
| 0.00075  | 0.04172  | 3.923  | 1.855 | -1.081 | 0.001 | 0.005 | -0.004 | SEC11A    | chr15:85214031-85223943:-   | chr15 |

|          |          |        |       |        |       |       |        |        |                            |       |
|----------|----------|--------|-------|--------|-------|-------|--------|--------|----------------------------|-------|
| 4.62E-09 | 1.37E-06 | 4.545  | 0.817 | -2.476 | 0.000 | 0.004 | -0.004 | CANX   | chr5:179151785-179153660:+ | chr5  |
| 4.11E-13 | 2.07E-10 | 4.400  | 0.806 | -2.450 | 0.000 | 0.004 | -0.004 | EIF3H  | chr8:117661187-117668094:- | chr8  |
| 5.74E-27 | 1.01E-23 | 14.147 | 5.804 | -1.286 | 0.001 | 0.005 | -0.004 | RPS27A | chr2:55462099-55462548:+   | chr2  |
| 1.72E-07 | 3.75E-05 | 13.470 | 9.282 | -0.537 | 0.003 | 0.006 | -0.003 | CAMP   | chr3:48266165-48266752:+   | chr3  |
| 2.31E-05 | 0.00279  | 3.902  | 1.879 | -1.054 | 0.001 | 0.004 | -0.003 | UBE2D3 | chr4:103720678-103722610:- | chr4  |
| 3.97E-06 | 0.00063  | 7.326  | 1.543 | -2.247 | 0.000 | 0.003 | -0.003 | RPL9   | chr4:39455867-39456152:-   | chr4  |
| 7.17E-28 | 1.40E-24 | 10.133 | 2.693 | -1.912 | 0.000 | 0.003 | -0.002 | PFN1   | chr17:4849320-4849922:-    | chr17 |
| 1.21E-07 | 2.73E-05 | 4.179  | 1.549 | -1.431 | 0.000 | 0.003 | -0.002 | CYBB   | chrX:37660602-37663109:+   | chrX  |
| 3.78E-11 | 1.54E-08 | 13.833 | 3.369 | -2.038 | 0.000 | 0.002 | -0.002 | TPT1   | chr13:45912933-45913631:-  | chr13 |
| 2.49E-09 | 7.68E-07 | 4.054  | 0.592 | -2.777 | 0.000 | 0.002 | -0.002 | P4HB   | chr17:79804961-79805118:-  | chr17 |
| 1.33E-15 | 8.71E-13 | 8.291  | 4.325 | -0.939 | 0.001 | 0.002 | -0.002 | RPS10  | chr6:34392633-34392848:-   | chr6  |
| 5.22E-45 | 3.63E-41 | 14.277 | 2.734 | -2.385 | 0.000 | 0.002 | -0.001 | LYZ    | chr12:69744053-69745971:+  | chr12 |
| 2.89E-07 | 5.99E-05 | 7.818  | 3.778 | -1.049 | 0.000 | 0.002 | -0.001 | RPL27A | chr11:8705629-8706243:+    | chr11 |
| 1.98E-23 | 2.87E-20 | 7.778  | 2.692 | -1.531 | 0.000 | 0.001 | -0.001 | RPL19  | chr17:37359363-37360302:+  | chr17 |
| 1.84E-29 | 3.94E-26 | 19.834 | 4.695 | -2.079 | 0.000 | 0.001 | -0.001 | S100A9 | chr1:153330358-153330714:+ | chr1  |
| 7.66E-27 | 1.34E-23 | 6.699  | 0.071 | -6.555 | 0.000 | 0.001 | -0.001 | RPL4   | chr15:66792532-66792630:-  | chr15 |
| 0.0004   | 0.02644  | 4.108  | 2.163 | -0.926 | 0.000 | 0.001 | -0.001 | PSAP   | chr10:73588859-73590882:-  | chr10 |
| 3.56E-07 | 7.24E-05 | 4.346  | 0.986 | -2.140 | 0.000 | 0.001 | -0.001 | RPL8   | chr8:146015874-146016661:- | chr8  |
| 3.43E-09 | 1.04E-06 | 5.113  | 2.168 | -1.238 | 0.000 | 0.001 | -0.001 | RPL41  | chr12:56510444-56510537:+  | chr12 |
| 2.87E-06 | 0.00047  | 4.721  | 2.209 | -1.095 | 0.000 | 0.001 | -0.001 | RPS11  | chr19:49999729-50000429:+  | chr19 |
| 1.80E-06 | 0.00031  | 4.434  | 1.433 | -1.630 | 0.000 | 0.001 | 0.000  | FTH1   | chr11:61733002-61734783:-  | chr11 |
| 2.85E-10 | 1.01E-07 | 5.054  | 1.510 | -1.742 | 0.000 | 0.001 | 0.000  | RPL21  | chr13:27829492-27830302:+  | chr13 |
| 0.00028  | 0.01992  | 3.865  | 1.914 | -1.014 | 0.000 | 0.001 | 0.000  | RPS10  | chr6:34392636-34392848:-   | chr6  |
| 1.53E-11 | 6.39E-09 | 13.276 | 6.480 | -1.035 | 0.000 | 0.000 | 0.000  | S100A9 | chr1:153330910-153333099:+ | chr1  |
| 0.00025  | 0.01845  | 7.780  | 5.614 | -0.471 | 0.000 | 0.000 | 0.000  | LYZ    | chr12:69742325-69743877:+  | chr12 |
| 5.17E-06 | 0.00079  | 8.532  | 6.303 | -0.437 | 0.553 | 0.548 | 0.005  | DNAJA4 | chr15:78566767-78567942:+  | chr15 |
| 0.00093  | 0.04869  | 4.789  | 2.940 | -0.704 | 0.758 | 0.700 | 0.058  |        | chr12:78940-87255:+        | chr12 |
| 2.27E-08 | 6.01E-06 | 9.145  | 4.577 | -0.998 | 0.461 | 0.284 | 0.176  | RPS15A | chr16:18799478-18800302:-  | chr16 |
| 2.14E-11 | 8.86E-09 | 5.261  | 0.690 | -2.932 | NA    | 0.592 | NA     | BCL6   | chr3:187449671-187451320:- | chr3  |
| 8.50E-56 | 9.72E-52 | 11.105 | 2.203 | -2.334 | NA    | 0.895 | NA     | CHTF18 | chr16:843275-844033:+      | chr16 |
| 1.87E-05 | 0.00232  | 3.780  | 1.712 | -1.143 | NA    | 0.549 | NA     | TAB3   | chrX:30864209-30864667:-   | chrX  |
| 6.19E-18 | 5.29E-15 | 4.839  | 0.519 | -3.221 | NA    | 0.723 | NA     | YIF1A  | chr11:66053069-66053171:-  | chr11 |
| 4.89E-22 | 6.18E-19 | 8.371  | 2.170 | -1.948 | NA    | 0.050 | NA     | ORM1   | chr9:117085528-117085924:+ | chr9  |
| 7.00E-05 | 0.00692  | 3.409  | 1.525 | -1.161 | NA    | 0.743 | NA     |        | chr17:41316848-41318996:-  | chr17 |

| n         |           |        |                            | WT_PSI |       |       |       |       |       |       |       |       |       | MUT   |       |  |
|-----------|-----------|--------|----------------------------|--------|-------|-------|-------|-------|-------|-------|-------|-------|-------|-------|-------|--|
| start     | end       | strand | distance to canonical site | AA306  | AA307 | AA308 | AA309 | RA006 | RA007 | RA008 | RA010 | RA011 | RA015 | AA301 | AA302 |  |
| 35646515  | 35647729  | +      | 17                         | 0.000  | 0.000 | 0.000 | 0.000 | 0.000 | 0.250 | 0.500 | 0.000 | 0.375 | 1.000 | 0.833 | 1.000 |  |
| 89519558  | 89527429  | -      | 13                         | 0.429  | 0.000 | 0.000 | 0.429 | 0.000 | 0.000 | 0.000 | 0.000 | 0.143 | 0.756 | 0.850 | 0.765 |  |
| 23545542  | 23556543  | -      | 14                         | 0.000  | 0.019 | 0.056 | 0.050 | 0.000 | 0.000 | 0.029 | 0.061 | 0.067 | 0.750 | 0.697 | 0.683 |  |
| 102074109 | 102076648 | +      | 23                         | 0.024  | 0.009 | 0.044 | 0.000 | 0.000 | 0.042 | 0.000 | 0.000 | 0.032 | 0.763 | 0.631 | 0.664 |  |
| 53689726  | 53691607  | +      | 26                         | 0.125  | 0.056 | 0.111 | 0.000 | 0.067 | 0.118 | 0.000 | 0.000 | 0.000 | 0.674 | 0.670 | 0.695 |  |
| 64119859  | 64120198  | +      | 17                         | 0.005  | 0.012 | 0.023 | 0.012 | 0.033 | 0.015 | 0.009 | 0.011 | 0.021 | 0.668 | 0.629 | 0.431 |  |
| 89778631  | 89779081  | +      | 15                         | 0.050  | 0.091 | 0.200 | 0.000 | 0.000 | 0.000 | 0.250 | 0.000 | 0.000 | 0.636 | 0.537 | 0.465 |  |
| 91269954  | 91271340  | -      | 20                         | 0.060  | 0.157 | 0.148 | 0.106 | 0.115 | 0.092 | 0.143 | 0.130 | 0.052 | 0.744 | 0.724 | 0.507 |  |
| 42835782  | 42845927  | -      | 14                         | 0.000  | 0.000 | 1.000 | 0.143 | 0.000 | 0.000 | 0.000 | 0.000 | 0.000 | 0.667 | 0.710 | 0.667 |  |
| 138725126 | 138725368 | -      | 16                         | 0.130  | 0.133 | 0.250 | 0.167 | 0.136 | 0.125 | 0.152 | 0.167 | 0.000 | 0.500 | 0.692 | 0.591 |  |
| 109102365 | 109102954 | +      | 12                         | 0.023  | 0.011 | 0.100 | 0.000 | 0.000 | 0.016 | 0.000 | 0.000 | 0.016 | 0.600 | 0.661 | 0.424 |  |
| 9133521   | 9136361   | -      | 12                         | 0.000  | 0.000 | 0.182 | 0.000 | 0.000 | 0.000 | 0.200 | 0.000 | 0.000 | 0.400 | 0.938 | 0.429 |  |
| 85848703  | 85850728  | +      | 20                         | 0.000  | 0.000 | 0.045 | 0.000 | 0.000 | 0.000 | 0.000 | 0.000 | 0.000 | 0.263 | 0.556 | 0.630 |  |
| 65716854  | 65718145  | -      | 18                         | 0.038  | 0.000 | 0.079 | 0.000 | 0.032 | 0.019 | 0.024 | 0.111 | 0.000 | 0.238 | 0.545 | 0.656 |  |
| 25158620  | 25160574  | -      | 23                         | 0.000  | 0.033 | 0.000 | 0.024 | 0.000 | 0.000 | 0.000 | 0.000 | 0.000 | 0.500 | 0.391 | 0.375 |  |
| 109767079 | 109767338 | -      | 13                         | 0.020  | 0.028 | 0.033 | 0.019 | 0.019 | 0.024 | 0.025 | 0.027 | 0.015 | 0.622 | 0.514 | 0.404 |  |
| 47315814  | 47326808  | -      | 16                         | 0.423  | 0.148 | 0.333 | 0.200 | 0.200 | 0.538 | 0.150 | 0.188 | 0.313 | 1.000 | 0.769 | 0.667 |  |
| 52283339  | 52283671  | +      | 14                         | 0.000  | 0.045 | 0.104 | 0.000 | 0.000 | 0.250 | 0.000 | 0.050 | 0.118 | 0.759 | 0.431 | 0.383 |  |
| 97285514  | 97297048  | -      | 14                         | 0.000  | 0.000 | 0.048 | 0.000 | 0.024 | 0.000 | 0.000 | 0.034 | 0.023 | 0.563 | 0.543 | 0.345 |  |
| 9960294   | 9962150   | +      | 24                         | 0.000  | 0.000 | 0.071 | 0.000 | 0.000 | 0.000 | 0.000 | 0.000 | 0.000 | 0.609 | 0.341 | 0.379 |  |
| 58115775  | 58117036  | +      | 17                         | 0.000  | 0.000 | 0.053 | 0.000 | 0.000 | 0.000 | 0.000 | 0.000 | 0.250 | 0.500 | 0.348 | 0.250 |  |
| 212515623 | 212519131 | +      | 13                         | 0.041  | 0.053 | 0.069 | 0.034 | 0.078 | 0.032 | 0.044 | 0.044 | 0.068 | 0.762 | 0.472 | 0.400 |  |
| 23237381  | 23238985  | +      | 14                         | 0.022  | 0.046 | 0.061 | 0.019 | 0.041 | 0.032 | 0.063 | 0.065 | 0.032 | 0.655 | 0.433 | 0.335 |  |
| 94157563  | 94162500  | +      | 16                         | 0.017  | 0.031 | 0.111 | 0.026 | 0.037 | 0.027 | 0.065 | 0.022 | 0.015 | 0.619 | 0.375 | 0.310 |  |
| 57908543  | 57909780  | +      | 17                         | 0.024  | 0.000 | 0.071 | 0.033 | 0.000 | 0.000 | 0.026 | 0.000 | 0.000 | 0.160 | 0.625 | 0.387 |  |
| 225670232 | 225670842 | -      | 12                         | 0.000  | 0.073 | 0.300 | 0.000 | 0.240 | 0.167 | 0.069 | 0.196 | 0.063 | 1.000 | 0.385 | 0.417 |  |
| 156532467 | 156532925 | -      | 9                          | 0.000  | 0.000 | 0.030 | 0.000 | 0.000 | 0.000 | 0.000 | 0.000 | 0.000 | 0.527 | 0.457 | 0.284 |  |
| 184566984 | 184567705 | +      | 18                         | 0.030  | 0.031 | 0.000 | 0.017 | 0.000 | 0.000 | 0.014 | 0.013 | 0.031 | 0.647 | 0.237 | 0.222 |  |
| 56552496  | 56553390  | +      | 16                         | 0.000  | 0.000 | 0.000 | 0.000 | 0.000 | 0.000 | 0.000 | 0.000 | 0.000 | 0.412 | 0.421 | 0.429 |  |
| 45300424  | 45300861  | +      | 13                         | 0.000  | 0.016 | 0.055 | 0.015 | 0.028 | 0.006 | 0.006 | 0.021 | 0.000 | 0.433 | 0.443 | 0.243 |  |
| 220044486 | 220044888 | +      | 31                         | 0.000  | 0.056 | 0.108 | 0.042 | 0.000 | 0.000 | 0.000 | 0.025 | 0.050 | 0.478 | 0.518 | 0.404 |  |
| 102276735 | 102286155 | -      | 17                         | 0.000  | 0.024 | 0.000 | 0.000 | 0.025 | 0.000 | 0.000 | 0.000 | 0.000 | 0.542 | 0.412 | 0.450 |  |
| 47970658  | 47971529  | +      | 17                         | 0.000  | 0.000 | 0.000 | 0.000 | 0.000 | 0.000 | 0.000 | 0.000 | 0.000 | 0.360 | 0.304 | 0.284 |  |
| 140508222 | 140508388 | +      | 44                         | 0.250  | 0.000 | 0.083 | 0.000 | 0.333 | 0.091 | 0.000 | 0.000 | 0.700 | 0.688 | 0.417 | 0.350 |  |
| 30811173  | 30818033  | +      | 14                         | 0.043  | 0.000 | 0.000 | 0.000 | 0.059 | 0.111 | 0.000 | 0.000 | 0.000 | 0.357 | 0.468 | 0.267 |  |
| 156721227 | 156723466 | +      | 27                         | 0.000  | 0.000 | 0.000 | 0.029 | 0.000 | 0.000 | 0.000 | 0.000 | 0.000 | 0.538 | 0.216 | 0.200 |  |
| 56874549  | 56875878  | +      | 22                         | 0.000  | 0.000 | 0.000 | 0.000 | 0.000 | 0.000 | 0.028 | 0.000 | 0.000 | 0.429 | 0.405 | 0.152 |  |
| 96305665  | 96306117  | +      | 16                         | 0.038  | 0.000 | 0.000 | 0.000 | 0.000 | 0.000 | 0.000 | 0.000 | 0.000 | 0.333 | 0.414 | 0.407 |  |
| 35813154  | 35813262  | -      | 11                         | 0.075  | 0.028 | 0.086 | 0.042 | 0.045 | 0.022 | 0.007 | 0.047 | 0.050 | 0.487 | 0.375 | 0.329 |  |
| 23283431  | 23285704  | -      | 14                         | 0.000  | 0.000 | 0.000 | 0.017 | 0.000 | 0.000 | 0.021 | 0.111 | 0.000 | 0.667 | 0.250 | 0.263 |  |
| 89358208  | 89371613  | -      | 22                         | 0.188  | 0.300 | 0.533 | 0.462 | 0.333 | 0.300 | 0.231 | 0.385 | 0.750 | 0.778 | 0.738 | 0.615 |  |
| 76943821  | 76950041  | -      | 14                         | 0.042  | 0.035 | 0.053 | 0.035 | 0.011 | 0.036 | 0.047 | 0.045 | 0.050 | 0.493 | 0.474 | 0.301 |  |
| 995352    | 995438    | +      | 28                         | 0.091  | 0.082 | 0.000 | 0.060 | 0.158 | 0.026 | 0.182 | 0.023 | 0.096 | 0.478 | 0.278 | 0.214 |  |
| 184577128 | 184580081 | -      | 13                         | 0.013  | 0.019 | 0.118 | 0.000 | 0.000 | 0.000 | 0.044 | 0.057 | 0.026 | 0.475 | 0.298 | 0.260 |  |
| 708345    | 708509    | +      | 15                         | 0.022  | 0.033 | 0.071 | 0.014 | 0.023 | 0.064 | 0.000 | 0.091 | 0.182 | 0.559 | 0.327 | 0.316 |  |
| 56649301  | 56649931  | +      | 18                         | 0.049  | 0.063 | 0.171 | 0.224 | 0.082 | 0.033 | 0.080 | 0.063 | 0.000 | 0.583 | 0.294 | 0.340 |  |
| 57148330  | 57153007  | -      | 21                         | 0.000  | 0.000 | 0.042 | 0.000 | 0.000 | 0.000 | 0.000 | 0.000 | 0.000 | 0.345 | 0.267 | 0.149 |  |
| 124495800 | 124496355 | +      | 13                         | 0.000  | 0.013 | 0.000 | 0.000 | 0.000 | 0.000 | 0.014 | 0.000 | 0.008 | 0.483 | 0.278 | 0.173 |  |
| 33319712  | 33321272  | +      | 22                         | 0.000  | 0.021 | 0.013 | 0.032 | 0.000 | 0.000 | 0.000 | 0.020 | 0.000 | 0.529 | 0.245 | 0.100 |  |

















|           |           |   |    |       |       |       |       |       |       |       |       |       |       |       |       |       |
|-----------|-----------|---|----|-------|-------|-------|-------|-------|-------|-------|-------|-------|-------|-------|-------|-------|
| 179151785 | 179153660 | + | 20 | 0.000 | 0.000 | 0.000 | 0.000 | 0.000 | 0.000 | 0.000 | 0.000 | 0.001 | 0.000 | 0.004 | 0.003 | 0.001 |
| 117661187 | 117668094 | - | 21 | 0.000 | 0.000 | 0.000 | 0.001 | 0.000 | 0.000 | 0.000 | 0.000 | 0.000 | 0.001 | 0.005 | 0.004 | 0.004 |
| 55462099  | 55462548  | + | 15 | 0.001 | 0.001 | 0.001 | 0.001 | 0.001 | 0.001 | 0.001 | 0.000 | 0.000 | 0.001 | 0.004 | 0.005 | 0.004 |
| 48266165  | 48266752  | + | 30 | 0.003 | 0.003 | 0.002 | 0.001 | 0.003 | 0.003 | 0.004 | 0.004 | 0.004 | 0.000 | 0.004 | 0.005 | 0.006 |
| 103720678 | 103722610 | - | 20 | 0.001 | 0.001 | 0.001 | 0.001 | 0.001 | 0.000 | 0.001 | 0.001 | 0.001 | 0.001 | 0.002 | 0.003 | 0.005 |
| 39455867  | 39456152  | - | 21 | 0.000 | 0.000 | 0.001 | 0.000 | 0.000 | 0.000 | 0.000 | 0.000 | 0.000 | 0.000 | 0.003 | 0.002 | 0.001 |
| 4849320   | 4849922   | - | 27 | 0.000 | 0.000 | 0.000 | 0.000 | 0.000 | 0.000 | 0.000 | 0.000 | 0.000 | 0.000 | 0.003 | 0.002 | 0.002 |
| 37660602  | 37663109  | + | 20 | 0.000 | 0.000 | 0.000 | 0.000 | 0.000 | 0.001 | 0.000 | 0.001 | 0.001 | 0.001 | 0.004 | 0.003 | 0.001 |
| 45912933  | 45913631  | - | 21 | 0.000 | 0.000 | 0.000 | 0.000 | 0.000 | 0.000 | 0.000 | 0.000 | 0.000 | 0.000 | 0.002 | 0.001 | 0.001 |
| 79804961  | 79805118  | - | 12 | 0.000 | 0.000 | 0.000 | 0.000 | 0.000 | 0.000 | 0.000 | 0.000 | 0.000 | 0.000 | 0.002 | 0.001 | 0.001 |
| 34392633  | 34392848  | - | 15 | 0.001 | 0.000 | 0.000 | 0.001 | 0.001 | 0.001 | 0.001 | 0.001 | 0.000 | 0.001 | 0.003 | 0.002 | 0.002 |
| 69744053  | 69745971  | + | 28 | 0.000 | 0.000 | 0.000 | 0.000 | 0.000 | 0.000 | 0.000 | 0.000 | 0.000 | 0.000 | 0.002 | 0.001 | 0.001 |
| 8705629   | 8706243   | + | 21 | 0.000 | 0.000 | 0.000 | 0.000 | 0.000 | 0.000 | 0.001 | 0.000 | 0.000 | 0.000 | 0.004 | 0.001 | 0.001 |
| 37359363  | 37360302  | + | 27 | 0.000 | 0.000 | 0.000 | 0.000 | 0.000 | 0.000 | 0.000 | 0.000 | 0.000 | 0.000 | 0.002 | 0.001 | 0.001 |
| 153330358 | 153330714 | + | 30 | 0.000 | 0.000 | 0.000 | 0.000 | 0.000 | 0.000 | 0.000 | 0.000 | 0.000 | 0.000 | 0.002 | 0.001 | 0.001 |
| 66792532  | 66792630  | - | 17 | 0.000 | 0.000 | 0.000 | 0.000 | 0.000 | 0.000 | 0.000 | 0.000 | 0.000 | 0.000 | 0.001 | 0.001 | 0.001 |
| 73588859  | 73590882  | - | 24 | 0.000 | 0.000 | 0.001 | 0.001 | 0.000 | 0.000 | 0.000 | 0.001 | 0.001 | 0.001 | 0.003 | 0.001 | 0.001 |
| 146015874 | 146016661 | - | 18 | 0.000 | 0.000 | 0.000 | 0.000 | 0.000 | 0.000 | 0.000 | 0.000 | 0.000 | 0.000 | 0.001 | 0.000 | 0.000 |
| 56510444  | 56510537  | + | 21 | 0.000 | 0.000 | 0.000 | 0.000 | 0.000 | 0.000 | 0.000 | 0.000 | 0.000 | 0.000 | 0.001 | 0.001 | 0.000 |
| 49999729  | 50000429  | + | 21 | 0.000 | 0.000 | 0.000 | 0.000 | 0.000 | 0.000 | 0.000 | 0.000 | 0.000 | 0.001 | 0.001 | 0.001 | 0.001 |
| 61733002  | 61734783  | - | 14 | 0.000 | 0.000 | 0.000 | 0.000 | 0.000 | 0.000 | 0.000 | 0.000 | 0.000 | 0.000 | 0.001 | 0.000 | 0.001 |
| 27829492  | 27830302  | + | 18 | 0.000 | 0.000 | 0.000 | 0.000 | 0.000 | 0.000 | 0.000 | 0.000 | 0.000 | 0.000 | 0.000 | 0.001 | 0.000 |
| 34392636  | 34392848  | - | 18 | 0.000 | 0.000 | 0.000 | 0.000 | 0.000 | 0.000 | 0.000 | 0.000 | 0.000 | 0.000 | 0.001 | 0.000 | 0.000 |
| 153330910 | 153333099 | + | 20 | 0.000 | 0.000 | 0.000 | 0.000 | 0.000 | 0.000 | 0.000 | 0.000 | 0.000 | 0.000 | 0.000 | 0.000 | 0.000 |
| 69742325  | 69743877  | + | 10 | 0.000 | 0.000 | 0.000 | 0.000 | 0.000 | 0.000 | 0.000 | 0.000 | 0.000 | 0.000 | 0.000 | 0.000 | 0.001 |
| 78566767  | 78567942  | + | 10 | 0.649 | 0.389 | 0.650 | 0.638 | 0.400 | 0.429 | 0.636 | 0.563 | 0.625 | 0.419 | 0.515 | 0.635 |       |
| 78940     | 87255     | + | 10 | 0.667 | 0.750 | 0.600 | 0.889 | 0.750 | 0.667 | 1.000 | 0.500 | 1.000 | 0.333 | 0.875 | 0.889 |       |
| 18799478  | 18800302  | - | 50 | 0.333 | 0.231 | 0.500 | 0.444 | 0.455 | 0.739 | 0.444 | 0.500 | 0.500 | 0.248 | 0.269 | 0.314 |       |
| 187449671 | 187451320 | - | 14 | 0.500 | 0.000 | 0.000 | NA    | 0.000 | 0.500 | 0.000 | 0.000 | 0.000 | 0.636 | 0.600 | 0.500 |       |
| 843275    | 844033    | + | 6  | NA    | 0.750 | 0.857 | 0.600 | 0.250 | 1.000 | NA    | 0.000 | NA    | 0.872 | 0.914 | 0.871 |       |
| 30864209  | 30864667  | - | 20 | 0.333 | 0.250 | 0.000 | 0.250 | 0.500 | NA    | 0.143 | 0.400 | 0.000 | 0.636 | 0.538 | 0.833 |       |
| 66053069  | 66053171  | - | 25 | 0.000 | 0.000 | 0.000 | 0.250 | 0.000 | 0.000 | NA    | 0.000 | 0.000 | 0.833 | 0.882 | 0.750 |       |
| 117085528 | 117085924 | + | 18 | 0.004 | 0.000 | 0.008 | 0.000 | 0.003 | 0.001 | 0.003 | 0.002 | NA    | 0.057 | 0.042 | 0.043 |       |
| 41316848  | 41318996  | - | 18 | 1.000 | 0.500 | 1.000 | NA    | 0.000 | NA    | 0.000 | 0.500 | 0.000 | 0.500 | 0.833 | 1.000 |       |

| PSI       |           |           | WT_reads_counts             |                             |                             |                             |                             |                             |                             |                             |                             |                             | MUT_reads_counts            |                             |                             |                             |                 | count |
|-----------|-----------|-----------|-----------------------------|-----------------------------|-----------------------------|-----------------------------|-----------------------------|-----------------------------|-----------------------------|-----------------------------|-----------------------------|-----------------------------|-----------------------------|-----------------------------|-----------------------------|-----------------------------|-----------------|-------|
| AA30<br>3 | AA30<br>4 | AA30<br>5 | count<br>Data.<br>AA30<br>6 | count<br>Data.<br>AA30<br>7 | count<br>Data.<br>AA3<br>08 | count<br>Data.<br>AA30<br>9 | count<br>Data.<br>RA00<br>6 | count<br>Data.<br>RA0<br>07 | count<br>Data.<br>RA0<br>08 | count<br>Data.<br>RA01<br>0 | count<br>Data.<br>RA0<br>11 | count<br>Data.<br>RA01<br>5 | count<br>Data.<br>AA30<br>1 | count<br>Data.<br>AA30<br>2 | count<br>Data.<br>AA30<br>3 | count<br>Data.<br>AA3<br>04 | a.A<br>A30<br>5 |       |
| 1.000     | 0.857     | 0.647     | 0                           | 0                           | 0                           | 0                           | 0                           | 1                           | 1                           | 0                           | 3                           | 5                           | 5                           | 8                           | 15                          | 12                          | 11              |       |
| 0.905     | 0.760     | 0.952     | 3                           | 0                           | 0                           | 3                           | 0                           | 0                           | 0                           | 0                           | 1                           | 31                          | 17                          | 13                          | 19                          | 19                          | 20              |       |
| 0.716     | 0.742     | 0.733     | 0                           | 1                           | 1                           | 1                           | 0                           | 0                           | 1                           | 2                           | 2                           | 24                          | 23                          | 28                          | 48                          | 23                          | 44              |       |
| 0.647     | 0.598     | 0.527     | 3                           | 1                           | 5                           | 0                           | 0                           | 3                           | 0                           | 0                           | 1                           | 74                          | 53                          | 87                          | 77                          | 58                          | 59              |       |
| 0.533     | 0.592     | 0.747     | 2                           | 2                           | 3                           | 0                           | 1                           | 2                           | 0                           | 0                           | 0                           | 31                          | 65                          | 41                          | 24                          | 58                          | 65              |       |
| 0.552     | 0.703     | 0.497     | 4                           | 11                          | 31                          | 7                           | 18                          | 11                          | 4                           | 5                           | 9                           | 346                         | 239                         | 162                         | 435                         | 365                         | 188             |       |
| 0.700     | 0.652     | 0.727     | 2                           | 1                           | 1                           | 0                           | 0                           | 0                           | 2                           | 0                           | 0                           | 7                           | 22                          | 20                          | 7                           | 30                          | 16              |       |
| 0.779     | 0.632     | 0.600     | 8                           | 20                          | 9                           | 10                          | 10                          | 10                          | 12                          | 13                          | 4                           | 29                          | 76                          | 37                          | 53                          | 36                          | 39              |       |
| 0.500     | 0.750     | 0.765     | 0                           | 0                           | 3                           | 2                           | 0                           | 0                           | 0                           | 0                           | 0                           | 8                           | 22                          | 16                          | 7                           | 15                          | 13              |       |
| 0.800     | 0.750     | 0.706     | 3                           | 2                           | 1                           | 1                           | 3                           | 3                           | 5                           | 1                           | 0                           | 2                           | 9                           | 13                          | 8                           | 15                          | 12              |       |
| 0.729     | 0.587     | 0.302     | 2                           | 1                           | 2                           | 0                           | 0                           | 1                           | 0                           | 0                           | 1                           | 12                          | 41                          | 25                          | 43                          | 27                          | 13              |       |
| 0.900     | 0.368     | 0.357     | 0                           | 0                           | 2                           | 0                           | 0                           | 0                           | 1                           | 0                           | 0                           | 2                           | 15                          | 3                           | 9                           | 7                           | 5               |       |
| 0.591     | 0.594     | 0.525     | 0                           | 0                           | 1                           | 0                           | 0                           | 0                           | 0                           | 0                           | 0                           | 5                           | 15                          | 17                          | 13                          | 38                          | 21              |       |
| 0.548     | 0.520     | 0.786     | 1                           | 0                           | 3                           | 0                           | 1                           | 1                           | 1                           | 1                           | 0                           | 5                           | 12                          | 42                          | 17                          | 13                          | 22              |       |
| 0.400     | 0.571     | 0.857     | 0                           | 1                           | 0                           | 1                           | 0                           | 0                           | 0                           | 0                           | 0                           | 3                           | 9                           | 6                           | 8                           | 8                           | 6               |       |
| 0.589     | 0.535     | 0.481     | 12                          | 21                          | 35                          | 6                           | 10                          | 23                          | 13                          | 14                          | 6                           | 304                         | 148                         | 97                          | 348                         | 191                         | 143             |       |
| 0.833     | 0.750     | 0.630     | 11                          | 4                           | 2                           | 2                           | 2                           | 7                           | 3                           | 3                           | 5                           | 5                           | 10                          | 8                           | 15                          | 12                          | 17              |       |
| 0.724     | 0.600     | 0.419     | 0                           | 1                           | 5                           | 0                           | 0                           | 3                           | 0                           | 1                           | 2                           | 41                          | 25                          | 18                          | 55                          | 33                          | 26              |       |
| 0.692     | 0.479     | 0.362     | 0                           | 0                           | 1                           | 0                           | 1                           | 0                           | 0                           | 2                           | 1                           | 18                          | 19                          | 19                          | 27                          | 34                          | 25              |       |
| 0.412     | 0.444     | 0.552     | 0                           | 0                           | 4                           | 0                           | 0                           | 0                           | 0                           | 0                           | 0                           | 14                          | 15                          | 22                          | 7                           | 20                          | 16              |       |
| 0.545     | 0.609     | 0.625     | 0                           | 0                           | 1                           | 0                           | 0                           | 0                           | 0                           | 0                           | 1                           | 6                           | 8                           | 7                           | 6                           | 14                          | 5               |       |
| 0.600     | 0.383     | 0.352     | 22                          | 34                          | 44                          | 9                           | 34                          | 13                          | 15                          | 24                          | 27                          | 176                         | 60                          | 84                          | 153                         | 101                         | 87              |       |
| 0.619     | 0.452     | 0.418     | 10                          | 17                          | 26                          | 7                           | 19                          | 20                          | 30                          | 17                          | 20                          | 400                         | 235                         | 191                         | 470                         | 331                         | 231             |       |
| 0.622     | 0.632     | 0.327     | 1                           | 3                           | 3                           | 1                           | 1                           | 1                           | 3                           | 1                           | 1                           | 13                          | 9                           | 13                          | 23                          | 24                          | 16              |       |
| 0.286     | 0.716     | 0.563     | 1                           | 0                           | 1                           | 1                           | 0                           | 0                           | 1                           | 0                           | 0                           | 4                           | 40                          | 12                          | 8                           | 48                          | 27              |       |
| 0.522     | 0.545     | 0.444     | 0                           | 3                           | 3                           | 0                           | 6                           | 3                           | 2                           | 9                           | 4                           | 10                          | 5                           | 5                           | 12                          | 18                          | 12              |       |
| 0.444     | 0.451     | 0.424     | 0                           | 0                           | 1                           | 0                           | 0                           | 0                           | 0                           | 0                           | 0                           | 39                          | 32                          | 23                          | 12                          | 23                          | 25              |       |
| 0.739     | 0.467     | 0.259     | 2                           | 4                           | 0                           | 1                           | 0                           | 0                           | 1                           | 1                           | 2                           | 11                          | 9                           | 8                           | 17                          | 14                          | 7               |       |
| 0.628     | 0.190     | 0.381     | 0                           | 0                           | 0                           | 0                           | 0                           | 0                           | 0                           | 0                           | 0                           | 14                          | 8                           | 3                           | 27                          | 4                           | 8               |       |
| 0.468     | 0.497     | 0.423     | 0                           | 2                           | 14                          | 9                           | 14                          | 1                           | 1                           | 2                           | 0                           | 52                          | 435                         | 147                         | 103                         | 249                         | 82              |       |
| 0.365     | 0.417     | 0.410     | 0                           | 2                           | 4                           | 1                           | 0                           | 0                           | 0                           | 1                           | 1                           | 22                          | 44                          | 19                          | 27                          | 25                          | 16              |       |
| 0.389     | 0.357     | 0.233     | 0                           | 1                           | 0                           | 0                           | 1                           | 0                           | 0                           | 0                           | 0                           | 13                          | 7                           | 9                           | 7                           | 10                          | 7               |       |
| 0.576     | 0.419     | 0.398     | 0                           | 0                           | 0                           | 0                           | 0                           | 0                           | 0                           | 0                           | 0                           | 32                          | 21                          | 23                          | 87                          | 44                          | 45              |       |
| 0.563     | 0.556     | 0.737     | 1                           | 0                           | 1                           | 0                           | 3                           | 1                           | 0                           | 0                           | 7                           | 11                          | 5                           | 7                           | 9                           | 10                          | 14              |       |
| 0.250     | 0.486     | 0.643     | 1                           | 0                           | 0                           | 0                           | 1                           | 1                           | 0                           | 0                           | 0                           | 5                           | 22                          | 8                           | 2                           | 17                          | 9               |       |
| 0.538     | 0.564     | 0.280     | 0                           | 0                           | 0                           | 2                           | 0                           | 0                           | 0                           | 0                           | 0                           | 7                           | 8                           | 12                          | 7                           | 22                          | 7               |       |
| 0.469     | 0.444     | 0.412     | 0                           | 0                           | 0                           | 0                           | 0                           | 0                           | 2                           | 0                           | 0                           | 12                          | 17                          | 5                           | 15                          | 28                          | 21              |       |
| 0.455     | 0.348     | 0.333     | 1                           | 0                           | 0                           | 0                           | 0                           | 0                           | 0                           | 0                           | 0                           | 4                           | 12                          | 11                          | 5                           | 8                           | 6               |       |
| 0.441     | 0.508     | 0.355     | 18                          | 3                           | 19                          | 21                          | 13                          | 6                           | 1                           | 4                           | 7                           | 110                         | 171                         | 119                         | 97                          | 199                         | 81              |       |
| 0.414     | 0.517     | 0.182     | 0                           | 0                           | 0                           | 1                           | 0                           | 0                           | 1                           | 4                           | 0                           | 6                           | 4                           | 5                           | 12                          | 15                          | 4               |       |
| 0.793     | 0.778     | 0.758     | 3                           | 9                           | 8                           | 6                           | 3                           | 3                           | 3                           | 5                           | 6                           | 21                          | 62                          | 24                          | 23                          | 21                          | 25              |       |
| 0.414     | 0.273     | 0.400     | 6                           | 8                           | 7                           | 4                           | 2                           | 4                           | 6                           | 9                           | 13                          | 35                          | 27                          | 25                          | 36                          | 18                          | 28              |       |
| 0.542     | 0.634     | 0.429     | 5                           | 6                           | 0                           | 3                           | 6                           | 2                           | 6                           | 1                           | 7                           | 11                          | 5                           | 9                           | 13                          | 26                          | 12              |       |
| 0.427     | 0.489     | 0.302     | 1                           | 1                           | 9                           | 0                           | 0                           | 0                           | 2                           | 2                           | 1                           | 28                          | 25                          | 26                          | 32                          | 44                          | 29              |       |
| 0.615     | 0.250     | 0.311     | 1                           | 1                           | 2                           | 1                           | 1                           | 3                           | 0                           | 1                           | 2                           | 19                          | 16                          | 25                          | 16                          | 17                          | 14              |       |
| 0.609     | 0.531     | 0.167     | 3                           | 3                           | 6                           | 11                          | 4                           | 4                           | 2                           | 3                           | 0                           | 14                          | 10                          | 17                          | 28                          | 17                          | 7               |       |
| 0.500     | 0.427     | 0.338     | 0                           | 0                           | 1                           | 0                           | 0                           | 0                           | 0                           | 0                           | 0                           | 10                          | 12                          | 13                          | 16                          | 32                          | 24              |       |
| 0.452     | 0.406     | 0.206     | 0                           | 1                           | 0                           | 0                           | 0                           | 0                           | 1                           | 0                           | 1                           | 29                          | 10                          | 9                           | 33                          | 26                          | 7               |       |
| 0.654     | 0.211     | 0.289     | 0                           | 2                           | 1                           | 3                           | 0                           | 0                           | 0                           | 1                           | 0                           | 18                          | 12                          | 5                           | 34                          | 8                           | 13              |       |

|       |       |       |    |   |   |    |    |    |    |    |    |    |     |    |     |     |     |
|-------|-------|-------|----|---|---|----|----|----|----|----|----|----|-----|----|-----|-----|-----|
| 0.391 | 0.416 | 0.281 | 0  | 0 | 3 | 0  | 0  | 0  | 0  | 0  | 0  | 20 | 17  | 19 | 25  | 32  | 25  |
| 0.457 | 0.470 | 0.268 | 8  | 6 | 5 | 4  | 3  | 8  | 11 | 5  | 11 | 18 | 27  | 20 | 32  | 54  | 22  |
| 0.375 | 0.186 | 0.217 | 2  | 1 | 1 | 1  | 1  | 1  | 0  | 1  | 1  | 9  | 6   | 7  | 3   | 8   | 5   |
| 0.356 | 0.333 | 0.300 | 0  | 0 | 2 | 0  | 0  | 0  | 1  | 0  | 0  | 11 | 11  | 15 | 16  | 24  | 6   |
| 0.304 | 0.107 | 0.145 | 1  | 0 | 1 | 0  | 0  | 2  | 0  | 1  | 0  | 46 | 13  | 18 | 73  | 12  | 19  |
| 0.244 | 0.378 | 0.222 | 0  | 0 | 1 | 0  | 0  | 0  | 0  | 0  | 0  | 16 | 26  | 24 | 21  | 31  | 16  |
| 0.535 | 0.196 | 0.117 | 0  | 0 | 2 | 0  | 1  | 0  | 0  | 0  | 1  | 59 | 23  | 12 | 69  | 22  | 17  |
| 0.705 | 0.433 | 0.581 | 14 | 8 | 3 | 13 | 9  | 9  | 12 | 11 | 6  | 19 | 21  | 24 | 31  | 13  | 18  |
| 0.500 | 0.205 | 0.342 | 0  | 0 | 0 | 0  | 0  | 0  | 0  | 0  | 0  | 7  | 7   | 6  | 10  | 8   | 13  |
| 0.429 | 0.105 | 0.450 | 5  | 5 | 1 | 0  | 7  | 1  | 2  | 4  | 5  | 11 | 10  | 8  | 21  | 2   | 9   |
| 0.308 | 0.225 | 0.300 | 4  | 0 | 1 | 7  | 12 | 9  | 0  | 1  | 0  | 5  | 15  | 13 | 4   | 9   | 6   |
| 0.300 | 0.219 | 0.256 | 2  | 1 | 1 | 0  | 0  | 0  | 1  | 1  | 3  | 9  | 16  | 5  | 9   | 7   | 11  |
| 0.386 | 0.281 | 0.200 | 0  | 0 | 4 | 2  | 1  | 2  | 0  | 0  | 10 | 52 | 66  | 61 | 329 | 129 | 108 |
| 0.314 | 0.358 | 0.224 | 0  | 2 | 2 | 0  | 2  | 1  | 3  | 2  | 0  | 7  | 12  | 7  | 16  | 19  | 15  |
| 0.242 | 0.158 | 0.347 | 1  | 0 | 0 | 1  | 2  | 0  | 0  | 0  | 0  | 9  | 82  | 29 | 16  | 34  | 17  |
| 0.196 | 0.241 | 0.274 | 0  | 0 | 0 | 0  | 1  | 0  | 1  | 0  | 0  | 8  | 19  | 14 | 9   | 13  | 17  |
| 0.481 | 0.205 | 0.231 | 2  | 5 | 2 | 6  | 7  | 4  | 4  | 5  | 3  | 19 | 19  | 14 | 26  | 8   | 9   |
| 0.429 | 0.417 | 0.286 | 4  | 7 | 6 | 2  | 2  | 13 | 4  | 9  | 3  | 6  | 25  | 15 | 15  | 20  | 14  |
| 0.388 | 0.200 | 0.170 | 0  | 1 | 0 | 0  | 0  | 0  | 1  | 0  | 2  | 11 | 11  | 11 | 26  | 18  | 15  |
| 0.417 | 0.286 | 0.116 | 0  | 3 | 0 | 0  | 0  | 0  | 0  | 0  | 1  | 15 | 8   | 10 | 15  | 16  | 5   |
| 0.359 | 0.171 | 0.172 | 0  | 0 | 1 | 0  | 0  | 0  | 0  | 0  | 1  | 9  | 6   | 8  | 14  | 6   | 5   |
| 0.317 | 0.308 | 0.257 | 0  | 0 | 1 | 2  | 1  | 0  | 1  | 0  | 4  | 15 | 12  | 5  | 13  | 12  | 9   |
| 0.398 | 0.500 | 0.065 | 0  | 0 | 4 | 1  | 3  | 0  | 2  | 2  | 0  | 34 | 54  | 11 | 94  | 61  | 2   |
| 0.459 | 0.204 | 0.175 | 1  | 1 | 4 | 0  | 0  | 1  | 0  | 1  | 0  | 11 | 13  | 6  | 17  | 11  | 10  |
| 0.311 | 0.367 | 0.218 | 0  | 0 | 0 | 0  | 0  | 1  | 2  | 0  | 0  | 10 | 17  | 22 | 28  | 36  | 19  |
| 0.257 | 0.267 | 0.290 | 0  | 0 | 0 | 0  | 0  | 0  | 0  | 1  | 0  | 9  | 1   | 5  | 9   | 8   | 9   |
| 0.164 | 0.473 | 0.286 | 0  | 0 | 1 | 0  | 0  | 0  | 0  | 0  | 0  | 9  | 18  | 10 | 12  | 53  | 18  |
| 0.322 | 0.244 | 0.105 | 0  | 0 | 1 | 0  | 0  | 0  | 0  | 0  | 0  | 44 | 25  | 13 | 46  | 40  | 14  |
| 0.240 | 0.087 | 0.319 | 0  | 0 | 0 | 0  | 0  | 0  | 2  | 0  | 0  | 15 | 21  | 11 | 12  | 4   | 15  |
| 0.341 | 0.280 | 0.173 | 0  | 0 | 5 | 0  | 1  | 0  | 0  | 0  | 0  | 31 | 8   | 8  | 44  | 35  | 13  |
| 0.206 | 0.180 | 0.202 | 2  | 4 | 4 | 1  | 1  | 4  | 0  | 0  | 0  | 42 | 99  | 45 | 62  | 50  | 57  |
| 0.337 | 0.190 | 0.246 | 3  | 7 | 5 | 7  | 2  | 2  | 4  | 1  | 2  | 24 | 39  | 26 | 28  | 23  | 29  |
| 0.373 | 0.145 | 0.159 | 3  | 1 | 3 | 4  | 2  | 10 | 3  | 6  | 19 | 18 | 12  | 13 | 25  | 11  | 11  |
| 0.218 | 0.268 | 0.352 | 0  | 0 | 0 | 0  | 0  | 0  | 0  | 1  | 1  | 8  | 13  | 10 | 12  | 19  | 19  |
| 0.370 | 0.188 | 0.063 | 0  | 0 | 1 | 0  | 0  | 1  | 0  | 0  | 0  | 9  | 13  | 18 | 20  | 12  | 4   |
| 0.271 | 0.175 | 0.261 | 0  | 2 | 0 | 0  | 0  | 0  | 0  | 0  | 0  | 16 | 7   | 2  | 13  | 11  | 12  |
| 0.267 | 0.375 | 0.200 | 2  | 4 | 2 | 0  | 1  | 2  | 2  | 2  | 4  | 6  | 3   | 6  | 4   | 9   | 4   |
| 0.211 | 0.265 | 0.172 | 3  | 0 | 3 | 0  | 0  | 1  | 0  | 0  | 2  | 11 | 24  | 22 | 8   | 26  | 15  |
| 0.280 | 0.387 | 0.333 | 8  | 6 | 3 | 6  | 2  | 0  | 6  | 1  | 1  | 16 | 466 | 9  | 116 | 41  | 7   |
| 0.236 | 0.337 | 0.306 | 6  | 9 | 0 | 5  | 7  | 10 | 10 | 6  | 38 | 42 | 51  | 32 | 25  | 34  | 33  |
| 0.193 | 0.316 | 0.133 | 1  | 2 | 0 | 0  | 3  | 1  | 1  | 1  | 0  | 15 | 20  | 9  | 16  | 24  | 13  |
| 0.179 | 0.404 | 0.273 | 0  | 0 | 1 | 3  | 0  | 0  | 0  | 0  | 0  | 3  | 10  | 9  | 7   | 23  | 12  |
| 0.230 | 0.262 | 0.171 | 1  | 3 | 6 | 0  | 0  | 1  | 4  | 2  | 5  | 33 | 42  | 50 | 48  | 74  | 38  |
| 0.229 | 0.188 | 0.154 | 0  | 0 | 3 | 0  | 0  | 0  | 0  | 0  | 0  | 8  | 14  | 9  | 8   | 6   | 6   |
| 0.441 | 0.137 | 0.077 | 1  | 1 | 3 | 0  | 0  | 1  | 1  | 1  | 0  | 10 | 8   | 7  | 15  | 7   | 4   |
| 0.200 | 0.333 | 0.273 | 1  | 0 | 2 | 2  | 1  | 1  | 2  | 0  | 1  | 3  | 8   | 4  | 4   | 11  | 3   |
| 0.196 | 0.215 | 0.246 | 0  | 0 | 7 | 1  | 2  | 0  | 0  | 0  | 1  | 8  | 37  | 19 | 20  | 31  | 29  |
| 0.161 | 0.243 | 0.308 | 0  | 0 | 7 | 0  | 2  | 0  | 1  | 0  | 6  | 5  | 19  | 32 | 39  | 50  | 69  |
| 0.184 | 0.264 | 0.127 | 0  | 0 | 0 | 0  | 0  | 0  | 1  | 0  | 0  | 9  | 19  | 15 | 7   | 14  | 7   |
| 0.229 | 0.444 | 0.133 | 1  | 2 | 1 | 1  | 3  | 2  | 0  | 5  | 4  | 5  | 7   | 4  | 8   | 16  | 6   |
| 0.365 | 0.071 | 0.175 | 0  | 2 | 1 | 0  | 0  | 0  | 0  | 0  | 1  | 11 | 7   | 10 | 19  | 5   | 7   |
| 0.170 | 0.236 | 0.188 | 2  | 3 | 7 | 0  | 1  | 2  | 3  | 0  | 0  | 37 | 38  | 32 | 34  | 45  | 26  |
| 0.244 | 0.314 | 0.096 | 0  | 0 | 0 | 0  | 0  | 0  | 0  | 1  | 0  | 14 | 9   | 6  | 11  | 22  | 7   |
| 0.161 | 0.134 | 0.200 | 5  | 0 | 1 | 9  | 4  | 5  | 0  | 2  | 0  | 31 | 16  | 21 | 9   | 13  | 11  |
| 0.172 | 0.370 | 0.158 | 0  | 0 | 5 | 1  | 1  | 0  | 0  | 0  | 0  | 18 | 15  | 14 | 21  | 60  | 19  |
| 0.214 | 0.322 | 0.141 | 2  | 0 | 2 | 0  | 2  | 2  | 1  | 1  | 5  | 9  | 31  | 36 | 22  | 64  | 18  |

|       |       |       |    |    |    |    |    |    |    |   |    |    |    |    |    |    |    |
|-------|-------|-------|----|----|----|----|----|----|----|---|----|----|----|----|----|----|----|
| 0.366 | 0.179 | 0.075 | 5  | 13 | 3  | 3  | 5  | 2  | 2  | 8 | 8  | 17 | 19 | 21 | 26 | 14 | 10 |
| 0.096 | 0.237 | 0.185 | 0  | 2  | 0  | 0  | 0  | 2  | 1  | 0 | 2  | 2  | 7  | 19 | 7  | 9  | 5  |
| 0.147 | 0.159 | 0.231 | 7  | 6  | 7  | 3  | 3  | 0  | 4  | 4 | 4  | 42 | 82 | 66 | 32 | 44 | 58 |
| 0.175 | 0.133 | 0.167 | 1  | 1  | 1  | 1  | 2  | 0  | 2  | 0 | 4  | 5  | 15 | 7  | 22 | 11 | 10 |
| 0.217 | 0.134 | 0.102 | 3  | 0  | 2  | 2  | 3  | 0  | 0  | 0 | 0  | 16 | 26 | 16 | 13 | 13 | 5  |
| 0.229 | 0.128 | 0.244 | 1  | 0  | 0  | 0  | 0  | 1  | 0  | 1 | 0  | 8  | 21 | 10 | 19 | 12 | 11 |
| 0.167 | 0.226 | 0.133 | 1  | 0  | 0  | 0  | 0  | 0  | 0  | 0 | 1  | 3  | 21 | 11 | 6  | 12 | 4  |
| 0.238 | 0.230 | 0.116 | 7  | 9  | 13 | 3  | 7  | 3  | 8  | 8 | 9  | 77 | 70 | 57 | 90 | 79 | 46 |
| 0.163 | 0.190 | 0.089 | 1  | 0  | 0  | 1  | 0  | 0  | 1  | 1 | 3  | 8  | 11 | 6  | 7  | 12 | 5  |
| 0.759 | 0.935 | 0.727 | 3  | 11 | 3  | 4  | 8  | 3  | 12 | 5 | 5  | 15 | 17 | 17 | 22 | 29 | 16 |
| 0.248 | 0.324 | 0.079 | 3  | 0  | 0  | 1  | 0  | 0  | 0  | 0 | 0  | 20 | 59 | 10 | 51 | 97 | 7  |
| 0.174 | 0.190 | 0.111 | 0  | 1  | 0  | 0  | 1  | 0  | 0  | 0 | 0  | 5  | 14 | 5  | 4  | 8  | 5  |
| 0.153 | 0.196 | 0.176 | 0  | 0  | 5  | 0  | 0  | 0  | 0  | 1 | 0  | 36 | 43 | 23 | 79 | 49 | 63 |
| 0.167 | 0.164 | 0.225 | 4  | 7  | 0  | 2  | 0  | 2  | 3  | 0 | 1  | 9  | 8  | 10 | 4  | 9  | 9  |
| 0.268 | 0.158 | 0.200 | 8  | 2  | 2  | 1  | 2  | 3  | 3  | 3 | 3  | 9  | 10 | 3  | 11 | 6  | 5  |
| 0.857 | 0.444 | 0.667 | 1  | 3  | 1  | 4  | 0  | 2  | 0  | 0 | 3  | 3  | 9  | 13 | 6  | 4  | 6  |
| 0.221 | 0.127 | 0.136 | 10 | 2  | 3  | 1  | 2  | 2  | 1  | 2 | 1  | 28 | 19 | 23 | 32 | 17 | 19 |
| 0.028 | 0.103 | 0.280 | 0  | 0  | 1  | 0  | 0  | 0  | 0  | 0 | 0  | 6  | 11 | 8  | 1  | 4  | 14 |
| 0.261 | 0.070 | 0.085 | 0  | 0  | 0  | 0  | 0  | 0  | 1  | 0 | 0  | 14 | 10 | 10 | 18 | 7  | 6  |
| 0.000 | 0.231 | 0.302 | 2  | 8  | 0  | 3  | 2  | 0  | 6  | 6 | 4  | 5  | 5  | 8  | 0  | 3  | 13 |
| 0.204 | 0.197 | 0.098 | 0  | 0  | 0  | 0  | 0  | 0  | 0  | 1 | 0  | 18 | 20 | 14 | 29 | 26 | 12 |
| 0.109 | 0.267 | 0.203 | 0  | 0  | 1  | 0  | 0  | 0  | 0  | 2 | 0  | 2  | 10 | 15 | 5  | 28 | 12 |
| 0.092 | 0.162 | 0.237 | 1  | 0  | 0  | 0  | 0  | 0  | 0  | 0 | 0  | 10 | 54 | 52 | 6  | 45 | 41 |
| 0.147 | 0.309 | 0.273 | 15 | 3  | 5  | 11 | 14 | 6  | 5  | 1 | 2  | 10 | 48 | 47 | 17 | 71 | 44 |
| 0.263 | 0.275 | 0.130 | 5  | 5  | 5  | 3  | 8  | 13 | 2  | 3 | 4  | 9  | 12 | 14 | 15 | 19 | 7  |
| 0.203 | 0.131 | 0.111 | 0  | 4  | 2  | 5  | 4  | 1  | 2  | 0 | 2  | 24 | 24 | 19 | 29 | 13 | 8  |
| 0.035 | 0.372 | 0.109 | 3  | 5  | 2  | 0  | 5  | 2  | 5  | 0 | 2  | 23 | 15 | 5  | 2  | 29 | 7  |
| 0.173 | 0.227 | 0.138 | 9  | 12 | 6  | 4  | 11 | 7  | 14 | 4 | 10 | 15 | 17 | 12 | 23 | 22 | 15 |
| 0.271 | 0.266 | 0.031 | 0  | 0  | 1  | 0  | 1  | 2  | 0  | 0 | 0  | 15 | 2  | 11 | 26 | 34 | 4  |
| 0.158 | 0.189 | 0.107 | 1  | 0  | 1  | 0  | 0  | 0  | 0  | 0 | 0  | 6  | 14 | 9  | 6  | 7  | 3  |
| 0.186 | 0.172 | 0.127 | 2  | 0  | 0  | 1  | 0  | 0  | 0  | 2 | 0  | 4  | 10 | 14 | 16 | 15 | 16 |
| 0.050 | 0.216 | 0.194 | 0  | 0  | 0  | 0  | 0  | 0  | 0  | 0 | 0  | 4  | 14 | 4  | 2  | 27 | 14 |
| 0.193 | 0.174 | 0.094 | 0  | 1  | 0  | 0  | 0  | 0  | 0  | 1 | 0  | 28 | 22 | 20 | 29 | 36 | 18 |
| 0.203 | 0.056 | 0.169 | 3  | 1  | 1  | 2  | 3  | 3  | 2  | 0 | 2  | 8  | 7  | 9  | 16 | 5  | 12 |
| 0.165 | 0.123 | 0.123 | 0  | 0  | 0  | 0  | 0  | 0  | 0  | 0 | 0  | 12 | 17 | 11 | 17 | 14 | 13 |
| 0.238 | 0.088 | 0.096 | 0  | 0  | 1  | 0  | 0  | 0  | 0  | 0 | 0  | 11 | 11 | 15 | 19 | 6  | 10 |
| 0.217 | 0.191 | 0.040 | 0  | 0  | 0  | 0  | 0  | 0  | 0  | 0 | 0  | 10 | 5  | 10 | 15 | 17 | 4  |
| 0.097 | 0.200 | 0.165 | 1  | 0  | 1  | 0  | 0  | 0  | 0  | 0 | 1  | 5  | 18 | 18 | 14 | 24 | 17 |
| 0.212 | 0.153 | 0.061 | 0  | 0  | 0  | 0  | 0  | 0  | 0  | 0 | 0  | 14 | 5  | 3  | 18 | 11 | 5  |
| 0.183 | 0.188 | 0.046 | 1  | 0  | 0  | 0  | 1  | 1  | 0  | 2 | 0  | 12 | 14 | 19 | 17 | 19 | 5  |
| 0.100 | 0.200 | 0.200 | 0  | 1  | 0  | 1  | 1  | 0  | 0  | 0 | 0  | 0  | 14 | 5  | 4  | 7  | 7  |
| 0.175 | 0.063 | 0.041 | 1  | 0  | 0  | 1  | 0  | 0  | 0  | 0 | 0  | 17 | 14 | 3  | 7  | 5  | 2  |
| 0.310 | 0.205 | 0.112 | 2  | 14 | 0  | 4  | 5  | 2  | 1  | 7 | 9  | 12 | 7  | 13 | 40 | 17 | 10 |
| 0.142 | 0.242 | 0.045 | 0  | 1  | 1  | 0  | 0  | 0  | 0  | 0 | 0  | 11 | 66 | 21 | 27 | 56 | 6  |
| 0.078 | 0.128 | 0.083 | 0  | 0  | 0  | 0  | 0  | 0  | 0  | 0 | 0  | 8  | 6  | 12 | 5  | 10 | 6  |
| 0.261 | 0.173 | 0.034 | 0  | 0  | 0  | 0  | 0  | 0  | 0  | 0 | 0  | 12 | 1  | 0  | 18 | 14 | 2  |
| 0.163 | 0.213 | 0.078 | 1  | 2  | 3  | 0  | 0  | 0  | 1  | 1 | 7  | 4  | 51 | 0  | 22 | 27 | 6  |
| 0.136 | 0.268 | 0.083 | 0  | 0  | 2  | 1  | 1  | 0  | 0  | 1 | 0  | 13 | 21 | 15 | 29 | 84 | 21 |
| 0.154 | 0.122 | 0.089 | 2  | 1  | 0  | 0  | 1  | 1  | 0  | 3 | 0  | 10 | 6  | 16 | 16 | 15 | 11 |
| 0.114 | 0.157 | 0.085 | 0  | 0  | 1  | 0  | 0  | 1  | 0  | 2 | 3  | 18 | 20 | 15 | 19 | 25 | 13 |
| 0.145 | 0.143 | 0.089 | 3  | 4  | 5  | 1  | 3  | 2  | 3  | 3 | 0  | 31 | 78 | 43 | 36 | 95 | 26 |
| 0.189 | 0.034 | 0.222 | 1  | 2  | 2  | 2  | 0  | 1  | 0  | 0 | 0  | 3  | 11 | 7  | 10 | 1  | 6  |
| 0.154 | 0.176 | 0.087 | 1  | 3  | 2  | 1  | 1  | 5  | 1  | 2 | 2  | 0  | 4  | 8  | 8  | 3  | 4  |
| 0.129 | 0.111 | 0.101 | 0  | 0  | 0  | 3  | 3  | 3  | 2  | 3 | 0  | 4  | 10 | 14 | 8  | 9  | 10 |
| 0.222 | 0.056 | 0.200 | 1  | 2  | 0  | 5  | 1  | 1  | 5  | 1 | 1  | 6  | 3  | 9  | 10 | 4  | 10 |
| 0.262 | 0.132 | 0.084 | 14 | 8  | 20 | 14 | 12 | 13 | 9  | 9 | 12 | 51 | 29 | 24 | 51 | 35 | 17 |

|       |       |       |    |    |    |    |    |    |    |    |    |     |     |    |     |     |    |
|-------|-------|-------|----|----|----|----|----|----|----|----|----|-----|-----|----|-----|-----|----|
| 0.115 | 0.152 | 0.104 | 0  | 0  | 0  | 0  | 0  | 2  | 1  | 0  | 0  | 8   | 17  | 9  | 10  | 21  | 7  |
| 0.190 | 0.138 | 0.095 | 0  | 0  | 2  | 0  | 2  | 1  | 0  | 1  | 0  | 9   | 5   | 8  | 20  | 13  | 10 |
| 0.171 | 0.122 | 0.036 | 0  | 0  | 0  | 1  | 0  | 0  | 0  | 0  | 0  | 12  | 6   | 2  | 14  | 10  | 3  |
| 0.219 | 0.096 | 0.072 | 2  | 2  | 0  | 1  | 3  | 0  | 1  | 0  | 0  | 24  | 20  | 11 | 50  | 28  | 13 |
| 0.154 | 0.174 | 0.126 | 20 | 16 | 19 | 20 | 38 | 15 | 13 | 10 | 10 | 48  | 38  | 42 | 50  | 67  | 40 |
| 0.192 | 0.162 | 0.054 | 0  | 2  | 1  | 0  | 0  | 0  | 0  | 1  | 0  | 32  | 10  | 7  | 25  | 49  | 11 |
| 0.127 | 0.102 | 0.065 | 0  | 0  | 0  | 0  | 1  | 0  | 0  | 0  | 1  | 7   | 12  | 9  | 10  | 13  | 8  |
| 0.133 | 0.152 | 0.224 | 2  | 1  | 0  | 1  | 0  | 1  | 1  | 1  | 2  | 1   | 5   | 2  | 8   | 10  | 13 |
| 0.180 | 0.171 | 0.229 | 24 | 35 | 9  | 8  | 13 | 15 | 21 | 11 | 37 | 22  | 29  | 18 | 22  | 37  | 30 |
| 0.135 | 0.209 | 0.218 | 17 | 6  | 5  | 45 | 21 | 8  | 6  | 7  | 0  | 19  | 108 | 57 | 13  | 48  | 19 |
| 0.194 | 0.111 | 0.282 | 1  | 1  | 1  | 1  | 1  | 2  | 0  | 3  | 3  | 1   | 5   | 5  | 7   | 4   | 11 |
| 0.122 | 0.140 | 0.145 | 8  | 8  | 5  | 6  | 11 | 3  | 4  | 3  | 3  | 8   | 25  | 14 | 18  | 18  | 17 |
| 0.211 | 0.090 | 0.160 | 1  | 2  | 3  | 0  | 3  | 4  | 0  | 0  | 1  | 5   | 6   | 6  | 15  | 8   | 12 |
| 0.108 | 0.132 | 0.084 | 0  | 1  | 2  | 1  | 0  | 2  | 0  | 0  | 1  | 9   | 1   | 4  | 11  | 14  | 8  |
| 0.033 | 0.141 | 0.059 | 0  | 1  | 0  | 0  | 0  | 1  | 0  | 1  | 0  | 12  | 3   | 10 | 2   | 14  | 6  |
| 0.129 | 0.150 | 0.043 | 1  | 0  | 2  | 1  | 0  | 8  | 2  | 2  | 17 | 30  | 4   | 1  | 15  | 17  | 3  |
| 0.091 | 0.164 | 0.098 | 3  | 1  | 1  | 3  | 4  | 1  | 4  | 3  | 3  | 3   | 9   | 9  | 3   | 10  | 6  |
| 0.208 | 0.190 | 0.223 | 48 | 59 | 44 | 15 | 26 | 27 | 41 | 38 | 17 | 28  | 37  | 57 | 66  | 28  | 35 |
| 0.226 | 0.069 | 0.065 | 4  | 11 | 7  | 1  | 0  | 5  | 7  | 4  | 7  | 8   | 15  | 14 | 28  | 10  | 8  |
| 0.101 | 0.129 | 0.083 | 2  | 3  | 1  | 3  | 8  | 3  | 3  | 3  | 3  | 16  | 25  | 13 | 23  | 24  | 13 |
| 0.080 | 0.113 | 0.060 | 1  | 0  | 1  | 1  | 0  | 1  | 0  | 0  | 0  | 11  | 15  | 9  | 7   | 12  | 7  |
| 0.090 | 0.069 | 0.098 | 1  | 1  | 0  | 3  | 1  | 0  | 0  | 1  | 1  | 14  | 18  | 9  | 13  | 16  | 18 |
| 0.080 | 0.115 | 0.068 | 1  | 0  | 0  | 0  | 0  | 0  | 0  | 1  | 1  | 11  | 11  | 4  | 9   | 17  | 10 |
| 0.091 | 0.115 | 0.065 | 1  | 2  | 4  | 2  | 2  | 1  | 1  | 1  | 0  | 22  | 35  | 27 | 29  | 52  | 24 |
| 0.095 | 0.097 | 0.087 | 8  | 20 | 13 | 2  | 21 | 21 | 12 | 4  | 8  | 137 | 77  | 40 | 211 | 91  | 73 |
| 0.073 | 0.160 | 0.080 | 5  | 1  | 3  | 4  | 0  | 4  | 4  | 2  | 1  | 16  | 48  | 11 | 17  | 41  | 16 |
| 0.079 | 0.179 | 0.138 | 15 | 12 | 14 | 55 | 22 | 11 | 12 | 4  | 2  | 57  | 156 | 85 | 34  | 188 | 67 |
| 0.200 | 0.086 | 0.066 | 0  | 2  | 1  | 0  | 0  | 5  | 1  | 0  | 14 | 9   | 5   | 0  | 20  | 6   | 5  |
| 0.182 | 0.065 | 0.049 | 0  | 2  | 0  | 0  | 0  | 0  | 0  | 0  | 3  | 5   | 2   | 8  | 14  | 7   | 3  |
| 0.202 | 0.198 | 0.170 | 7  | 9  | 7  | 5  | 7  | 8  | 14 | 4  | 2  | 27  | 25  | 22 | 21  | 16  | 18 |
| 0.103 | 0.105 | 0.093 | 0  | 1  | 2  | 0  | 0  | 0  | 0  | 0  | 0  | 4   | 12  | 5  | 7   | 16  | 12 |
| 0.094 | 0.084 | 0.105 | 2  | 2  | 0  | 0  | 0  | 0  | 1  | 2  | 1  | 13  | 16  | 14 | 15  | 17  | 16 |
| 0.106 | 0.123 | 0.130 | 0  | 0  | 1  | 3  | 3  | 1  | 4  | 1  | 0  | 5   | 2   | 4  | 5   | 7   | 7  |
| 0.060 | 0.066 | 0.126 | 0  | 0  | 0  | 0  | 2  | 1  | 0  | 1  | 3  | 6   | 6   | 9  | 3   | 5   | 11 |
| 0.113 | 0.060 | 0.075 | 1  | 5  | 0  | 2  | 0  | 1  | 3  | 2  | 13 | 7   | 13  | 11 | 11  | 6   | 13 |
| 0.198 | 0.119 | 0.056 | 5  | 2  | 0  | 0  | 0  | 2  | 2  | 3  | 2  | 7   | 6   | 12 | 16  | 16  | 7  |
| 0.086 | 0.029 | 0.079 | 0  | 3  | 2  | 0  | 2  | 0  | 0  | 2  | 1  | 5   | 21  | 23 | 20  | 6   | 11 |
| 0.102 | 0.118 | 0.035 | 0  | 0  | 0  | 0  | 0  | 0  | 0  | 0  | 0  | 50  | 13  | 19 | 11  | 49  | 13 |
| 0.011 | 0.078 | 0.074 | 0  | 0  | 0  | 0  | 0  | 0  | 0  | 0  | 0  | 7   | 4   | 13 | 1   | 8   | 8  |
| 0.072 | 0.050 | 0.095 | 1  | 5  | 0  | 0  | 0  | 0  | 1  | 0  | 1  | 11  | 15  | 26 | 26  | 14  | 29 |
| 0.137 | 0.086 | 0.107 | 1  | 1  | 2  | 1  | 0  | 2  | 1  | 0  | 1  | 28  | 22  | 8  | 55  | 35  | 43 |
| 0.075 | 0.068 | 0.082 | 1  | 0  | 1  | 0  | 0  | 0  | 0  | 0  | 0  | 11  | 3   | 4  | 9   | 7   | 10 |
| 0.047 | 0.083 | 0.120 | 2  | 0  | 0  | 0  | 0  | 1  | 0  | 0  | 0  | 9   | 31  | 30 | 9   | 26  | 29 |
| 0.139 | 0.104 | 0.024 | 3  | 0  | 0  | 0  | 2  | 1  | 0  | 0  | 3  | 9   | 8   | 5  | 14  | 13  | 2  |
| 0.120 | 0.109 | 0.040 | 1  | 0  | 0  | 3  | 2  | 1  | 0  | 0  | 1  | 12  | 13  | 13 | 16  | 25  | 5  |
| 0.135 | 0.159 | 0.038 | 9  | 11 | 11 | 4  | 3  | 6  | 1  | 5  | 4  | 10  | 16  | 16 | 21  | 21  | 4  |
| 0.053 | 0.097 | 0.048 | 2  | 1  | 0  | 2  | 1  | 1  | 1  | 2  | 1  | 5   | 6   | 8  | 4   | 9   | 5  |
| 0.072 | 0.028 | 0.118 | 0  | 3  | 0  | 1  | 3  | 0  | 0  | 1  | 0  | 12  | 26  | 6  | 11  | 3   | 4  |
| 0.065 | 0.053 | 0.147 | 2  | 3  | 4  | 1  | 1  | 0  | 2  | 0  | 0  | 2   | 11  | 12 | 6   | 6   | 14 |
| 0.105 | 0.036 | 0.079 | 1  | 0  | 0  | 1  | 1  | 0  | 0  | 0  | 0  | 2   | 19  | 9  | 8   | 4   | 8  |
| 0.031 | 0.064 | 0.101 | 0  | 0  | 0  | 1  | 0  | 0  | 0  | 0  | 0  | 10  | 22  | 15 | 5   | 14  | 21 |
| 0.087 | 0.100 | 0.035 | 0  | 2  | 1  | 1  | 1  | 0  | 0  | 1  | 1  | 9   | 14  | 9  | 9   | 19  | 4  |
| 0.071 | 0.041 | 0.053 | 2  | 0  | 4  | 2  | 3  | 0  | 4  | 1  | 1  | 24  | 10  | 19 | 11  | 9   | 8  |
| 0.071 | 0.085 | 0.154 | 5  | 3  | 0  | 1  | 1  | 2  | 0  | 0  | 3  | 3   | 4   | 6  | 4   | 7   | 12 |
| 0.036 | 0.089 | 0.097 | 1  | 3  | 0  | 0  | 0  | 1  | 1  | 3  | 0  | 7   | 17  | 22 | 6   | 21  | 26 |
| 0.063 | 0.090 | 0.098 | 10 | 19 | 11 | 7  | 9  | 17 | 12 | 7  | 73 | 14  | 44  | 29 | 22  | 15  | 21 |



|       |       |       |      |      |      |     |      |      |     |     |     |      |      |      |       |      |      |
|-------|-------|-------|------|------|------|-----|------|------|-----|-----|-----|------|------|------|-------|------|------|
| 0.172 | 0.094 | 0.114 | 7    | 4    | 5    | 5   | 3    | 2    | 3   | 3   | 3   | 7    | 5    | 15   | 10    | 10   | 9    |
| 0.141 | 0.112 | 0.043 | 0    | 2    | 0    | 0   | 2    | 0    | 1   | 0   | 0   | 2    | 4    | 6    | 11    | 12   | 4    |
| 0.088 | 0.133 | 0.045 | 1    | 2    | 0    | 1   | 0    | 1    | 2   | 0   | 3   | 2    | 4    | 6    | 6     | 10   | 2    |
| 0.077 | 0.093 | 0.089 | 4    | 6    | 3    | 1   | 2    | 0    | 6   | 9   | 1   | 8    | 15   | 10   | 6     | 9    | 9    |
| 0.082 | 0.118 | 0.038 | 4    | 3    | 20   | 4   | 4    | 6    | 2   | 2   | 0   | 204  | 74   | 60   | 302   | 251  | 78   |
| 0.084 | 0.069 | 0.092 | 0    | 0    | 0    | 2   | 0    | 1    | 0   | 0   | 0   | 3    | 8    | 9    | 9     | 12   | 8    |
| 0.078 | 0.054 | 0.080 | 1    | 0    | 0    | 0   | 0    | 0    | 0   | 0   | 0   | 9    | 4    | 7    | 10    | 8    | 11   |
| 0.068 | 0.052 | 0.041 | 4    | 1    | 1    | 3   | 0    | 1    | 4   | 3   | 2   | 15   | 25   | 27   | 13    | 12   | 8    |
| 0.063 | 0.115 | 0.044 | 1    | 1    | 4    | 1   | 0    | 0    | 0   | 0   | 0   | 5    | 6    | 7    | 4     | 9    | 3    |
| 0.048 | 0.079 | 0.059 | 0    | 0    | 1    | 1   | 0    | 0    | 0   | 0   | 0   | 16   | 26   | 24   | 12    | 25   | 13   |
| 0.089 | 0.062 | 0.047 | 0    | 0    | 1    | 0   | 0    | 0    | 0   | 0   | 0   | 22   | 14   | 13   | 20    | 20   | 14   |
| 0.087 | 0.093 | 0.057 | 0    | 0    | 4    | 1   | 0    | 1    | 0   | 1   | 3   | 25   | 13   | 10   | 30    | 35   | 23   |
| 0.074 | 0.115 | 0.049 | 0    | 0    | 1    | 0   | 0    | 0    | 0   | 0   | 0   | 15   | 40   | 17   | 28    | 52   | 13   |
| 0.132 | 0.106 | 0.009 | 2    | 1    | 0    | 0   | 0    | 0    | 0   | 0   | 0   | 2    | 25   | 8    | 7     | 13   | 1    |
| 0.063 | 0.086 | 0.055 | 1    | 0    | 2    | 1   | 2    | 1    | 0   | 0   | 1   | 10   | 9    | 3    | 7     | 14   | 5    |
| 0.039 | 0.095 | 0.062 | 2    | 5    | 4    | 2   | 1    | 1    | 0   | 2   | 0   | 35   | 216  | 44   | 35    | 104  | 42   |
| 0.100 | 0.088 | 0.021 | 0    | 0    | 0    | 0   | 1    | 5    | 0   | 0   | 6   | 5    | 13   | 8    | 9     | 14   | 3    |
| 0.175 | 0.027 | 0.004 | 0    | 1    | 1    | 0   | 0    | 0    | 0   | 0   | 0   | 17   | 2    | 5    | 30    | 8    | 1    |
| 0.080 | 0.087 | 0.065 | 0    | 0    | 0    | 0   | 0    | 1    | 2   | 0   | 1   | 2    | 8    | 6    | 10    | 12   | 7    |
| 0.050 | 0.038 | 0.048 | 2    | 0    | 1    | 1   | 3    | 1    | 3   | 1   | 4   | 16   | 23   | 7    | 9     | 8    | 11   |
| 0.136 | 0.041 | 0.033 | 0    | 0    | 0    | 0   | 1    | 3    | 0   | 0   | 0   | 8    | 4    | 10   | 16    | 5    | 3    |
| 0.115 | 0.067 | 0.032 | 0    | 0    | 0    | 0   | 0    | 0    | 0   | 0   | 0   | 11   | 12   | 4    | 18    | 19   | 6    |
| 0.092 | 0.089 | 0.098 | 1328 | 1079 | 3617 | 453 | 2255 | 2105 | 744 | 961 | 319 | 8973 | 4086 | 3432 | ##### | 3147 | 5692 |
| 0.074 | 0.128 | 0.046 | 2    | 2    | 9    | 0   | 1    | 0    | 2   | 1   | 1   | 91   | 18   | 19   | 147   | 117  | 31   |
| 0.037 | 0.075 | 0.091 | 1    | 1    | 0    | 1   | 0    | 0    | 0   | 3   | 0   | 5    | 20   | 15   | 6     | 24   | 16   |
| 0.049 | 0.075 | 0.080 | 1    | 0    | 1    | 3   | 2    | 2    | 1   | 0   | 1   | 7    | 3    | 12   | 5     | 8    | 7    |
| 0.085 | 0.067 | 0.026 | 0    | 0    | 0    | 0   | 0    | 0    | 0   | 0   | 0   | 15   | 19   | 15   | 19    | 30   | 8    |
| 0.057 | 0.048 | 0.073 | 0    | 1    | 1    | 0   | 1    | 0    | 1   | 0   | 0   | 19   | 31   | 28   | 16    | 26   | 32   |
| 0.149 | 0.042 | 0.052 | 0    | 1    | 3    | 0   | 0    | 0    | 0   | 0   | 2   | 12   | 4    | 4    | 20    | 9    | 10   |
| 0.070 | 0.032 | 0.077 | 0    | 0    | 1    | 2   | 5    | 2    | 1   | 2   | 2   | 10   | 16   | 17   | 15    | 8    | 17   |
| 0.032 | 0.105 | 0.038 | 0    | 0    | 0    | 0   | 0    | 0    | 0   | 0   | 0   | 9    | 28   | 14   | 8     | 40   | 9    |
| 0.075 | 0.069 | 0.041 | 0    | 0    | 0    | 0   | 0    | 0    | 0   | 0   | 0   | 7    | 7    | 6    | 14    | 12   | 9    |
| 0.097 | 0.114 | 0.033 | 0    | 0    | 0    | 0   | 0    | 0    | 0   | 0   | 0   | 4    | 12   | 2    | 11    | 16   | 4    |
| 0.058 | 0.098 | 0.024 | 0    | 1    | 2    | 0   | 0    | 0    | 3   | 2   | 1   | 11   | 6    | 12   | 21    | 18   | 5    |
| 0.066 | 0.056 | 0.051 | 1    | 0    | 0    | 0   | 0    | 3    | 0   | 0   | 0   | 25   | 47   | 41   | 25    | 44   | 25   |
| 0.017 | 0.088 | 0.098 | 10   | 8    | 32   | 14  | 10   | 8    | 8   | 4   | 20  | 52   | 58   | 44   | 11    | 56   | 58   |
| 0.054 | 0.036 | 0.086 | 0    | 0    | 0    | 0   | 0    | 0    | 0   | 0   | 0   | 10   | 9    | 16   | 24    | 6    | 17   |
| 0.124 | 0.081 | 0.043 | 6    | 1    | 3    | 1   | 2    | 1    | 11  | 0   | 4   | 11   | 13   | 7    | 13    | 11   | 6    |
| 0.050 | 0.064 | 0.056 | 1    | 0    | 0    | 0   | 0    | 1    | 0   | 0   | 0   | 4    | 13   | 10   | 9     | 11   | 9    |
| 0.070 | 0.018 | 0.054 | 1    | 0    | 0    | 0   | 0    | 1    | 1   | 1   | 0   | 7    | 9    | 6    | 11    | 2    | 7    |
| 0.066 | 0.144 | 0.055 | 5    | 8    | 4    | 1   | 10   | 0    | 10  | 4   | 0   | 21   | 7    | 12   | 17    | 55   | 23   |
| 0.061 | 0.025 | 0.066 | 0    | 1    | 1    | 1   | 0    | 2    | 1   | 0   | 0   | 29   | 61   | 50   | 47    | 24   | 69   |
| 0.074 | 0.111 | 0.039 | 8    | 7    | 6    | 5   | 6    | 7    | 3   | 7   | 6   | 29   | 11   | 8    | 32    | 36   | 10   |
| 0.066 | 0.088 | 0.037 | 1    | 1    | 7    | 0   | 0    | 0    | 1   | 0   | 1   | 20   | 20   | 24   | 21    | 30   | 16   |
| 0.054 | 0.080 | 0.027 | 4    | 2    | 2    | 2   | 1    | 2    | 5   | 2   | 3   | 10   | 13   | 14   | 13    | 21   | 7    |
| 0.094 | 0.037 | 0.033 | 0    | 0    | 0    | 0   | 0    | 1    | 0   | 0   | 0   | 3    | 16   | 6    | 11    | 6    | 3    |
| 0.018 | 0.102 | 0.025 | 0    | 0    | 0    | 1   | 0    | 0    | 0   | 0   | 0   | 2    | 13   | 12   | 1     | 13   | 1    |
| 0.090 | 0.079 | 0.068 | 0    | 0    | 0    | 0   | 0    | 0    | 2   | 0   | 0   | 1    | 8    | 2    | 13    | 11   | 7    |
| 0.091 | 0.032 | 0.063 | 0    | 0    | 0    | 1   | 0    | 4    | 2   | 1   | 4   | 3    | 15   | 6    | 18    | 5    | 8    |
| 0.096 | 0.048 | 0.045 | 8    | 4    | 5    | 9   | 3    | 3    | 3   | 0   | 2   | 14   | 39   | 15   | 20    | 17   | 16   |
| 0.095 | 0.063 | 0.033 | 1    | 1    | 4    | 0   | 6    | 0    | 0   | 0   | 0   | 20   | 11   | 9    | 45    | 25   | 14   |
| 0.074 | 0.065 | 0.059 | 3    | 0    | 2    | 2   | 4    | 2    | 2   | 1   | 4   | 5    | 7    | 4    | 6     | 6    | 3    |
| 0.038 | 0.065 | 0.043 | 1    | 2    | 0    | 1   | 0    | 0    | 0   | 0   | 1   | 10   | 11   | 29   | 15    | 25   | 17   |
| 0.029 | 0.152 | 0.044 | 0    | 5    | 5    | 0   | 0    | 0    | 0   | 0   | 0   | 4    | 6    | 7    | 6     | 28   | 11   |
| 0.026 | 0.041 | 0.031 | 0    | 1    | 0    | 1   | 1    | 1    | 0   | 0   | 0   | 6    | 21   | 9    | 2     | 5    | 3    |
| 0.030 | 0.022 | 0.045 | 0    | 0    | 1    | 0   | 0    | 1    | 0   | 0   | 0   | 14   | 38   | 12   | 9     | 6    | 13   |

|       |       |       |    |    |    |   |    |    |    |   |    |     |     |     |     |     |     |
|-------|-------|-------|----|----|----|---|----|----|----|---|----|-----|-----|-----|-----|-----|-----|
| 0.040 | 0.070 | 0.059 | 0  | 0  | 2  | 3 | 0  | 0  | 0  | 0 | 1  | 19  | 20  | 18  | 16  | 34  | 25  |
| 0.042 | 0.072 | 0.041 | 0  | 0  | 1  | 0 | 1  | 0  | 0  | 0 | 2  | 7   | 25  | 14  | 10  | 20  | 9   |
| 0.036 | 0.055 | 0.021 | 0  | 1  | 0  | 1 | 1  | 1  | 0  | 0 | 1  | 9   | 9   | 3   | 5   | 7   | 2   |
| 0.079 | 0.064 | 0.061 | 5  | 2  | 2  | 2 | 2  | 3  | 1  | 1 | 4  | 9   | 11  | 3   | 16  | 13  | 9   |
| 0.060 | 0.028 | 0.039 | 0  | 0  | 0  | 0 | 0  | 2  | 2  | 0 | 1  | 24  | 8   | 2   | 8   | 6   | 5   |
| 0.073 | 0.098 | 0.090 | 2  | 5  | 1  | 6 | 1  | 1  | 5  | 6 | 3  | 5   | 6   | 14  | 6   | 13  | 12  |
| 0.098 | 0.056 | 0.051 | 1  | 1  | 0  | 0 | 0  | 1  | 2  | 0 | 0  | 4   | 2   | 5   | 14  | 8   | 6   |
| 0.072 | 0.065 | 0.027 | 2  | 0  | 0  | 1 | 1  | 0  | 1  | 0 | 2  | 6   | 8   | 7   | 7   | 10  | 4   |
| 0.035 | 0.039 | 0.049 | 0  | 0  | 1  | 2 | 1  | 1  | 0  | 0 | 1  | 14  | 25  | 19  | 17  | 14  | 17  |
| 0.074 | 0.025 | 0.019 | 0  | 0  | 0  | 0 | 0  | 0  | 0  | 0 | 0  | 4   | 11  | 5   | 19  | 5   | 3   |
| 0.041 | 0.028 | 0.060 | 0  | 0  | 1  | 0 | 0  | 1  | 0  | 0 | 0  | 5   | 11  | 4   | 6   | 4   | 10  |
| 0.053 | 0.023 | 0.044 | 0  | 1  | 1  | 0 | 0  | 0  | 0  | 2 | 1  | 7   | 5   | 6   | 7   | 4   | 6   |
| 0.065 | 0.058 | 0.055 | 0  | 4  | 3  | 1 | 1  | 0  | 0  | 2 | 2  | 7   | 8   | 10  | 18  | 16  | 13  |
| 0.039 | 0.128 | 0.030 | 3  | 3  | 2  | 1 | 0  | 0  | 0  | 0 | 0  | 3   | 5   | 3   | 4   | 21  | 4   |
| 0.020 | 0.057 | 0.070 | 1  | 0  | 1  | 0 | 1  | 1  | 0  | 0 | 0  | 9   | 22  | 15  | 5   | 26  | 27  |
| 0.032 | 0.054 | 0.056 | 14 | 8  | 68 | 9 | 38 | 38 | 25 | 5 | 8  | 216 | 353 | 439 | 267 | 708 | 462 |
| 0.028 | 0.048 | 0.069 | 0  | 0  | 2  | 0 | 0  | 0  | 0  | 0 | 0  | 9   | 19  | 13  | 9   | 22  | 20  |
| 0.059 | 0.037 | 0.035 | 0  | 1  | 2  | 0 | 0  | 0  | 0  | 0 | 3  | 39  | 15  | 14  | 45  | 18  | 19  |
| 0.025 | 0.049 | 0.031 | 2  | 2  | 0  | 1 | 0  | 0  | 2  | 1 | 1  | 4   | 8   | 7   | 6   | 5   | 4   |
| 0.036 | 0.017 | 0.071 | 0  | 0  | 4  | 0 | 0  | 0  | 0  | 2 | 0  | 4   | 26  | 15  | 14  | 5   | 22  |
| 0.058 | 0.062 | 0.057 | 1  | 3  | 7  | 1 | 1  | 0  | 2  | 1 | 0  | 18  | 30  | 23  | 27  | 40  | 25  |
| 0.056 | 0.063 | 0.070 | 6  | 6  | 4  | 3 | 11 | 6  | 4  | 5 | 2  | 21  | 9   | 16  | 17  | 16  | 20  |
| 0.085 | 0.031 | 0.067 | 1  | 0  | 0  | 0 | 2  | 1  | 1  | 1 | 3  | 3   | 7   | 4   | 12  | 6   | 13  |
| 0.058 | 0.042 | 0.028 | 0  | 2  | 2  | 0 | 2  | 1  | 2  | 0 | 2  | 41  | 51  | 34  | 51  | 61  | 32  |
| 0.044 | 0.054 | 0.043 | 0  | 1  | 0  | 1 | 0  | 0  | 0  | 2 | 0  | 4   | 9   | 6   | 6   | 11  | 5   |
| 0.036 | 0.061 | 0.017 | 0  | 0  | 1  | 0 | 0  | 0  | 0  | 0 | 0  | 13  | 4   | 7   | 13  | 19  | 5   |
| 0.048 | 0.052 | 0.039 | 1  | 1  | 0  | 0 | 2  | 1  | 0  | 2 | 1  | 6   | 6   | 7   | 8   | 8   | 6   |
| 0.054 | 0.022 | 0.074 | 0  | 0  | 5  | 0 | 3  | 3  | 0  | 1 | 1  | 2   | 5   | 10  | 7   | 3   | 7   |
| 0.038 | 0.052 | 0.072 | 2  | 2  | 1  | 0 | 0  | 0  | 0  | 0 | 0  | 2   | 14  | 8   | 6   | 13  | 12  |
| 0.057 | 0.064 | 0.050 | 1  | 6  | 8  | 1 | 2  | 2  | 2  | 4 | 2  | 5   | 10  | 3   | 11  | 7   | 7   |
| 0.032 | 0.068 | 0.050 | 3  | 3  | 2  | 2 | 2  | 1  | 2  | 2 | 0  | 53  | 23  | 22  | 80  | 71  | 46  |
| 0.028 | 0.045 | 0.059 | 0  | 0  | 2  | 0 | 0  | 0  | 0  | 1 | 0  | 4   | 16  | 11  | 4   | 12  | 12  |
| 0.036 | 0.044 | 0.034 | 1  | 1  | 27 | 0 | 0  | 2  | 1  | 0 | 1  | 261 | 300 | 319 | 261 | 486 | 330 |
| 0.042 | 0.058 | 0.017 | 2  | 0  | 0  | 0 | 4  | 2  | 0  | 0 | 4  | 8   | 4   | 6   | 6   | 7   | 2   |
| 0.054 | 0.039 | 0.024 | 0  | 1  | 1  | 0 | 4  | 0  | 0  | 0 | 0  | 22  | 14  | 21  | 20  | 26  | 14  |
| 0.041 | 0.054 | 0.028 | 4  | 1  | 4  | 2 | 4  | 1  | 1  | 1 | 1  | 35  | 43  | 25  | 40  | 59  | 26  |
| 0.042 | 0.028 | 0.036 | 2  | 0  | 2  | 0 | 0  | 1  | 0  | 0 | 0  | 10  | 7   | 9   | 8   | 8   | 8   |
| 0.038 | 0.052 | 0.044 | 1  | 4  | 7  | 2 | 5  | 5  | 0  | 1 | 4  | 23  | 34  | 21  | 24  | 35  | 23  |
| 0.042 | 0.045 | 0.048 | 0  | 3  | 1  | 0 | 3  | 2  | 4  | 2 | 0  | 8   | 24  | 14  | 14  | 19  | 15  |
| 0.027 | 0.066 | 0.028 | 1  | 2  | 0  | 2 | 2  | 2  | 0  | 1 | 0  | 6   | 12  | 5   | 3   | 12  | 3   |
| 0.040 | 0.036 | 0.032 | 0  | 0  | 1  | 1 | 0  | 0  | 0  | 1 | 0  | 8   | 21  | 11  | 12  | 16  | 12  |
| 0.065 | 0.030 | 0.028 | 0  | 1  | 0  | 0 | 0  | 0  | 0  | 0 | 1  | 4   | 10  | 3   | 13  | 6   | 6   |
| 0.087 | 0.030 | 0.035 | 6  | 8  | 1  | 3 | 2  | 0  | 2  | 2 | 3  | 4   | 8   | 8   | 16  | 7   | 11  |
| 0.087 | 0.057 | 0.008 | 6  | 6  | 3  | 4 | 3  | 6  | 4  | 6 | 3  | 17  | 17  | 11  | 22  | 16  | 2   |
| 0.038 | 0.019 | 0.028 | 0  | 0  | 0  | 0 | 0  | 0  | 2  | 1 | 0  | 13  | 25  | 10  | 11  | 6   | 6   |
| 0.099 | 0.022 | 0.017 | 0  | 0  | 0  | 1 | 0  | 0  | 0  | 0 | 1  | 8   | 6   | 1   | 22  | 7   | 4   |
| 0.038 | 0.025 | 0.051 | 0  | 0  | 0  | 0 | 0  | 1  | 1  | 0 | 0  | 3   | 8   | 9   | 6   | 7   | 10  |
| 0.041 | 0.089 | 0.043 | 1  | 4  | 4  | 5 | 2  | 6  | 4  | 5 | 2  | 21  | 26  | 12  | 16  | 34  | 13  |
| 0.005 | 0.069 | 0.038 | 2  | 2  | 4  | 2 | 0  | 2  | 1  | 2 | 2  | 5   | 16  | 11  | 1   | 17  | 7   |
| 0.016 | 0.040 | 0.037 | 0  | 0  | 1  | 1 | 0  | 0  | 1  | 0 | 0  | 12  | 18  | 28  | 10  | 30  | 25  |
| 0.052 | 0.023 | 0.024 | 0  | 0  | 0  | 1 | 0  | 0  | 0  | 0 | 0  | 7   | 7   | 10  | 12  | 7   | 6   |
| 0.056 | 0.050 | 0.020 | 6  | 18 | 5  | 9 | 11 | 10 | 16 | 9 | 29 | 26  | 47  | 29  | 28  | 28  | 7   |
| 0.056 | 0.047 | 0.026 | 4  | 1  | 2  | 4 | 3  | 2  | 1  | 0 | 0  | 9   | 9   | 12  | 17  | 21  | 9   |
| 0.027 | 0.049 | 0.024 | 0  | 1  | 1  | 0 | 1  | 0  | 2  | 1 | 3  | 14  | 14  | 12  | 21  | 22  | 10  |
| 0.050 | 0.046 | 0.018 | 0  | 0  | 3  | 0 | 0  | 0  | 0  | 0 | 0  | 16  | 5   | 14  | 27  | 22  | 9   |
| 0.000 | 0.075 | 0.003 | 0  | 0  | 0  | 0 | 0  | 0  | 0  | 2 | 0  | 68  | 35  | 4   | 0   | 82  | 3   |

|       |       |       |    |    |     |    |     |    |     |    |    |     |     |     |     |     |     |
|-------|-------|-------|----|----|-----|----|-----|----|-----|----|----|-----|-----|-----|-----|-----|-----|
| 0.016 | 0.048 | 0.025 | 0  | 0  | 2   | 1  | 0   | 0  | 0   | 0  | 0  | 5   | 15  | 16  | 5   | 18  | 7   |
| 0.027 | 0.056 | 0.025 | 2  | 0  | 3   | 1  | 1   | 0  | 1   | 2  | 0  | 6   | 5   | 3   | 3   | 10  | 3   |
| 0.022 | 0.055 | 0.036 | 0  | 0  | 1   | 0  | 0   | 1  | 0   | 0  | 0  | 2   | 8   | 4   | 7   | 18  | 10  |
| 0.047 | 0.015 | 0.034 | 0  | 2  | 0   | 2  | 1   | 0  | 0   | 1  | 0  | 17  | 80  | 42  | 36  | 26  | 28  |
| 0.032 | 0.019 | 0.032 | 3  | 3  | 3   | 3  | 2   | 2  | 1   | 1  | 1  | 51  | 33  | 16  | 18  | 12  | 19  |
| 0.000 | 0.035 | 0.061 | 0  | 2  | 0   | 0  | 0   | 2  | 0   | 1  | 1  | 8   | 15  | 13  | 0   | 12  | 10  |
| 0.023 | 0.047 | 0.043 | 1  | 2  | 2   | 2  | 2   | 0  | 5   | 4  | 0  | 26  | 38  | 52  | 36  | 114 | 65  |
| 0.045 | 0.035 | 0.033 | 1  | 0  | 1   | 0  | 0   | 2  | 1   | 2  | 1  | 12  | 2   | 2   | 10  | 7   | 9   |
| 0.056 | 0.042 | 0.036 | 1  | 4  | 5   | 3  | 9   | 5  | 3   | 6  | 0  | 9   | 8   | 8   | 14  | 10  | 6   |
| 0.066 | 0.047 | 0.030 | 4  | 13 | 8   | 8  | 8   | 8  | 6   | 8  | 9  | 7   | 14  | 18  | 26  | 12  | 7   |
| 0.021 | 0.047 | 0.038 | 0  | 4  | 1   | 3  | 3   | 1  | 0   | 0  | 8  | 8   | 10  | 7   | 4   | 6   | 6   |
| 0.039 | 0.041 | 0.026 | 2  | 2  | 2   | 2  | 6   | 2  | 1   | 1  | 1  | 15  | 17  | 9   | 14  | 16  | 9   |
| 0.038 | 0.030 | 0.018 | 0  | 0  | 2   | 0  | 0   | 0  | 0   | 0  | 0  | 9   | 9   | 12  | 15  | 20  | 9   |
| 0.035 | 0.100 | 0.048 | 33 | 19 | 35  | 54 | 25  | 25 | 24  | 9  | 35 | 28  | 116 | 96  | 31  | 124 | 43  |
| 0.024 | 0.033 | 0.045 | 6  | 12 | 1   | 0  | 2   | 2  | 3   | 2  | 13 | 4   | 6   | 10  | 9   | 5   | 11  |
| 0.044 | 0.020 | 0.024 | 1  | 0  | 0   | 1  | 0   | 0  | 0   | 2  | 0  | 13  | 30  | 6   | 15  | 13  | 10  |
| 0.086 | 0.009 | 0.051 | 0  | 0  | 2   | 2  | 2   | 0  | 0   | 3  | 0  | 1   | 2   | 4   | 13  | 2   | 9   |
| 0.667 | 0.650 | 0.682 | 63 | 92 | 113 | 59 | 116 | 71 | 134 | 63 | 69 | 189 | 211 | 122 | 118 | 130 | 103 |
| 0.024 | 0.022 | 0.020 | 0  | 0  | 0   | 0  | 1   | 0  | 0   | 0  | 0  | 7   | 11  | 15  | 7   | 8   | 5   |
| 0.025 | 0.033 | 0.030 | 1  | 0  | 0   | 3  | 1   | 3  | 1   | 0  | 0  | 7   | 4   | 8   | 4   | 7   | 6   |
| 0.027 | 0.025 | 0.023 | 0  | 2  | 1   | 0  | 1   | 0  | 0   | 1  | 2  | 7   | 8   | 16  | 13  | 9   | 7   |
| 0.028 | 0.048 | 0.042 | 1  | 0  | 1   | 4  | 0   | 1  | 1   | 0  | 2  | 1   | 8   | 4   | 4   | 8   | 6   |
| 0.029 | 0.073 | 0.031 | 14 | 33 | 17  | 9  | 16  | 33 | 16  | 21 | 42 | 48  | 28  | 25  | 31  | 58  | 24  |
| 0.068 | 0.049 | 0.002 | 0  | 0  | 0   | 0  | 0   | 0  | 0   | 0  | 0  | 8   | 1   | 0   | 17  | 23  | 1   |
| 0.041 | 0.037 | 0.044 | 5  | 2  | 2   | 1  | 2   | 0  | 1   | 0  | 4  | 8   | 5   | 7   | 13  | 12  | 12  |
| 0.037 | 0.074 | 0.016 | 3  | 0  | 2   | 0  | 2   | 0  | 3   | 0  | 1  | 2   | 7   | 6   | 4   | 10  | 2   |
| 0.006 | 0.056 | 0.055 | 2  | 2  | 0   | 3  | 0   | 1  | 0   | 2  | 0  | 1   | 10  | 9   | 1   | 13  | 11  |
| 0.043 | 0.023 | 0.013 | 0  | 0  | 1   | 2  | 0   | 0  | 0   | 0  | 0  | 16  | 17  | 8   | 19  | 13  | 5   |
| 0.036 | 0.000 | 0.025 | 1  | 0  | 1   | 0  | 2   | 1  | 2   | 0  | 1  | 8   | 6   | 5   | 9   | 0   | 5   |
| 0.030 | 0.022 | 0.029 | 0  | 1  | 0   | 2  | 1   | 0  | 0   | 0  | 0  | 3   | 31  | 7   | 5   | 8   | 4   |
| 0.023 | 0.059 | 0.027 | 0  | 1  | 0   | 0  | 1   | 0  | 1   | 0  | 0  | 3   | 12  | 3   | 5   | 26  | 8   |
| 0.017 | 0.043 | 0.027 | 3  | 2  | 0   | 2  | 0   | 1  | 0   | 2  | 0  | 7   | 8   | 16  | 7   | 33  | 18  |
| 0.061 | 0.025 | 0.004 | 0  | 0  | 1   | 0  | 2   | 1  | 0   | 0  | 1  | 9   | 2   | 2   | 14  | 7   | 1   |
| 0.031 | 0.051 | 0.021 | 0  | 2  | 0   | 3  | 0   | 3  | 0   | 0  | 0  | 4   | 4   | 4   | 4   | 12  | 5   |
| 0.025 | 0.029 | 0.042 | 5  | 8  | 12  | 1  | 4   | 8  | 4   | 14 | 8  | 17  | 7   | 13  | 16  | 16  | 19  |
| 0.021 | 0.017 | 0.041 | 0  | 0  | 2   | 1  | 2   | 0  | 0   | 1  | 0  | 4   | 24  | 17  | 12  | 16  | 32  |
| 0.036 | 0.022 | 0.014 | 0  | 1  | 0   | 0  | 0   | 0  | 0   | 0  | 0  | 6   | 10  | 15  | 13  | 12  | 7   |
| 0.025 | 0.029 | 0.021 | 1  | 0  | 2   | 0  | 2   | 0  | 1   | 0  | 0  | 5   | 14  | 5   | 7   | 11  | 6   |
| 0.039 | 0.038 | 0.004 | 4  | 2  | 4   | 0  | 2   | 0  | 0   | 2  | 0  | 5   | 8   | 6   | 10  | 12  | 1   |
| 0.050 | 0.036 | 0.024 | 4  | 7  | 5   | 4  | 6   | 3  | 8   | 7  | 1  | 7   | 18  | 13  | 16  | 14  | 8   |
| 0.013 | 0.032 | 0.031 | 0  | 4  | 2   | 0  | 0   | 0  | 9   | 5  | 0  | 9   | 20  | 58  | 18  | 32  | 27  |
| 0.018 | 0.018 | 0.021 | 0  | 0  | 0   | 0  | 0   | 0  | 0   | 0  | 0  | 6   | 5   | 8   | 5   | 8   | 8   |
| 0.000 | 0.033 | 0.030 | 1  | 0  | 0   | 0  | 0   | 0  | 1   | 0  | 0  | 1   | 29  | 9   | 0   | 6   | 3   |
| 0.011 | 0.019 | 0.035 | 1  | 0  | 5   | 0  | 0   | 0  | 0   | 0  | 0  | 8   | 9   | 11  | 4   | 10  | 15  |
| 0.024 | 0.020 | 0.016 | 1  | 1  | 0   | 3  | 0   | 0  | 1   | 1  | 0  | 17  | 10  | 13  | 13  | 14  | 12  |
| 0.019 | 0.038 | 0.014 | 1  | 1  | 2   | 0  | 1   | 0  | 1   | 0  | 0  | 10  | 14  | 8   | 11  | 30  | 7   |
| 0.026 | 0.023 | 0.021 | 1  | 0  | 2   | 0  | 0   | 1  | 0   | 0  | 0  | 8   | 4   | 11  | 11  | 10  | 9   |
| 0.016 | 0.024 | 0.010 | 0  | 0  | 2   | 0  | 1   | 2  | 0   | 0  | 5  | 14  | 4   | 5   | 8   | 7   | 3   |
| 0.033 | 0.031 | 0.020 | 2  | 4  | 3   | 0  | 2   | 0  | 0   | 1  | 0  | 1   | 2   | 8   | 7   | 8   | 4   |
| 0.049 | 0.025 | 0.008 | 0  | 0  | 2   | 2  | 0   | 0  | 0   | 1  | 0  | 10  | 0   | 4   | 14  | 9   | 2   |
| 0.012 | 0.033 | 0.005 | 0  | 2  | 4   | 2  | 3   | 2  | 0   | 2  | 0  | 10  | 21  | 17  | 10  | 13  | 2   |
| 0.027 | 0.045 | 0.003 | 3  | 0  | 1   | 2  | 1   | 1  | 0   | 1  | 0  | 11  | 18  | 5   | 7   | 22  | 1   |
| 0.036 | 0.031 | 0.017 | 11 | 8  | 16  | 6  | 8   | 5  | 10  | 6  | 16 | 25  | 24  | 39  | 47  | 42  | 19  |
| 0.011 | 0.026 | 0.006 | 0  | 0  | 0   | 0  | 0   | 0  | 0   | 0  | 0  | 4   | 22  | 4   | 3   | 10  | 1   |
| 0.020 | 0.020 | 0.006 | 0  | 0  | 0   | 2  | 3   | 1  | 0   | 0  | 1  | 13  | 40  | 11  | 11  | 14  | 3   |
| 0.022 | 0.026 | 0.021 | 3  | 2  | 0   | 4  | 0   | 2  | 1   | 3  | 3  | 8   | 9   | 8   | 4   | 7   | 5   |

|       |       |       |    |    |    |    |    |    |    |    |    |     |     |     |     |     |     |
|-------|-------|-------|----|----|----|----|----|----|----|----|----|-----|-----|-----|-----|-----|-----|
| 0.025 | 0.023 | 0.012 | 7  | 7  | 25 | 4  | 14 | 2  | 3  | 6  | 5  | 113 | 56  | 39  | 269 | 120 | 60  |
| 0.016 | 0.012 | 0.013 | 0  | 0  | 1  | 0  | 2  | 0  | 0  | 0  | 3  | 10  | 10  | 5   | 4   | 5   | 4   |
| 0.013 | 0.011 | 0.012 | 0  | 0  | 0  | 0  | 0  | 0  | 0  | 0  | 0  | 10  | 13  | 4   | 7   | 5   | 5   |
| 0.042 | 0.022 | 0.011 | 8  | 6  | 7  | 5  | 8  | 1  | 7  | 8  | 9  | 35  | 25  | 21  | 50  | 38  | 16  |
| 0.010 | 0.007 | 0.004 | 2  | 1  | 0  | 1  | 0  | 0  | 2  | 1  | 3  | 11  | 14  | 9   | 4   | 3   | 2   |
| 0.005 | 0.012 | 0.033 | 1  | 0  | 2  | 1  | 0  | 0  | 1  | 0  | 4  | 0   | 15  | 8   | 3   | 7   | 17  |
| 0.050 | 0.015 | 0.025 | 1  | 1  | 0  | 3  | 1  | 0  | 3  | 1  | 7  | 3   | 5   | 10  | 22  | 6   | 11  |
| 0.029 | 0.030 | 0.011 | 0  | 0  | 0  | 0  | 0  | 0  | 0  | 0  | 0  | 7   | 4   | 2   | 14  | 24  | 7   |
| 0.033 | 0.011 | 0.011 | 0  | 0  | 0  | 0  | 0  | 0  | 0  | 0  | 0  | 12  | 7   | 4   | 16  | 7   | 6   |
| 0.000 | 0.041 | 0.039 | 3  | 1  | 2  | 0  | 1  | 1  | 0  | 1  | 2  | 2   | 9   | 7   | 0   | 11  | 9   |
| 0.011 | 0.026 | 0.027 | 0  | 0  | 0  | 4  | 0  | 2  | 0  | 1  | 0  | 22  | 94  | 79  | 37  | 118 | 76  |
| 0.020 | 0.012 | 0.016 | 0  | 2  | 0  | 0  | 3  | 2  | 0  | 1  | 1  | 1   | 7   | 10  | 13  | 4   | 6   |
| 0.018 | 0.035 | 0.009 | 1  | 0  | 5  | 0  | 0  | 3  | 0  | 5  | 0  | 13  | 8   | 5   | 12  | 19  | 4   |
| 0.016 | 0.020 | 0.008 | 0  | 0  | 0  | 0  | 0  | 0  | 0  | 0  | 0  | 42  | 68  | 41  | 42  | 76  | 21  |
| 0.018 | 0.035 | 0.016 | 4  | 5  | 3  | 1  | 6  | 2  | 4  | 4  | 1  | 11  | 15  | 5   | 6   | 19  | 7   |
| 0.031 | 0.008 | 0.008 | 0  | 1  | 0  | 0  | 0  | 0  | 0  | 0  | 0  | 17  | 4   | 0   | 26  | 5   | 5   |
| 0.048 | 0.035 | 0.035 | 39 | 19 | 11 | 57 | 15 | 20 | 27 | 15 | 40 | 14  | 72  | 47  | 27  | 51  | 22  |
| 0.020 | 0.014 | 0.014 | 0  | 0  | 0  | 0  | 0  | 2  | 0  | 0  | 1  | 9   | 17  | 10  | 15  | 25  | 16  |
| 0.009 | 0.017 | 0.024 | 1  | 0  | 2  | 2  | 0  | 2  | 1  | 1  | 0  | 4   | 9   | 2   | 3   | 11  | 12  |
| 0.030 | 0.018 | 0.003 | 2  | 1  | 0  | 1  | 1  | 0  | 0  | 0  | 0  | 5   | 3   | 3   | 15  | 14  | 2   |
| 0.018 | 0.008 | 0.008 | 0  | 2  | 0  | 1  | 0  | 2  | 0  | 0  | 0  | 4   | 7   | 7   | 10  | 5   | 4   |
| 0.007 | 0.012 | 0.017 | 0  | 0  | 1  | 0  | 1  | 0  | 1  | 0  | 6  | 3   | 11  | 6   | 2   | 6   | 7   |
| 0.022 | 0.014 | 0.009 | 3  | 1  | 3  | 1  | 2  | 2  | 0  | 1  | 0  | 9   | 6   | 12  | 12  | 12  | 7   |
| 0.018 | 0.005 | 0.005 | 0  | 0  | 0  | 0  | 0  | 0  | 0  | 0  | 0  | 6   | 25  | 5   | 8   | 4   | 3   |
| 0.014 | 0.011 | 0.009 | 0  | 0  | 4  | 0  | 0  | 0  | 0  | 0  | 1  | 8   | 4   | 3   | 9   | 7   | 5   |
| 0.018 | 0.019 | 0.005 | 0  | 0  | 1  | 0  | 0  | 0  | 0  | 0  | 0  | 5   | 11  | 7   | 20  | 37  | 8   |
| 0.017 | 0.008 | 0.009 | 2  | 0  | 0  | 1  | 3  | 1  | 2  | 0  | 0  | 8   | 6   | 11  | 15  | 9   | 10  |
| 0.009 | 0.018 | 0.009 | 1  | 2  | 1  | 0  | 0  | 1  | 0  | 0  | 0  | 8   | 12  | 7   | 3   | 18  | 6   |
| 0.014 | 0.012 | 0.007 | 0  | 1  | 1  | 0  | 0  | 0  | 0  | 0  | 0  | 4   | 12  | 14  | 21  | 17  | 8   |
| 0.012 | 0.004 | 0.013 | 2  | 4  | 1  | 1  | 1  | 3  | 2  | 2  | 3  | 12  | 16  | 7   | 12  | 5   | 16  |
| 0.001 | 0.018 | 0.006 | 0  | 0  | 0  | 0  | 0  | 0  | 0  | 1  | 0  | 5   | 10  | 4   | 1   | 18  | 6   |
| 0.013 | 0.013 | 0.006 | 2  | 2  | 2  | 4  | 3  | 1  | 3  | 1  | 2  | 20  | 17  | 18  | 30  | 42  | 19  |
| 0.010 | 0.015 | 0.005 | 3  | 2  | 6  | 1  | 0  | 2  | 1  | 0  | 3  | 30  | 6   | 9   | 25  | 27  | 9   |
| 0.010 | 0.007 | 0.006 | 7  | 5  | 32 | 6  | 7  | 3  | 7  | 6  | 5  | 367 | 238 | 141 | 409 | 298 | 215 |
| 0.015 | 0.007 | 0.015 | 2  | 4  | 0  | 3  | 1  | 6  | 3  | 5  | 0  | 3   | 11  | 9   | 12  | 11  | 13  |
| 0.010 | 0.006 | 0.008 | 0  | 0  | 2  | 0  | 0  | 2  | 2  | 1  | 0  | 18  | 19  | 20  | 22  | 16  | 17  |
| 0.016 | 0.004 | 0.006 | 0  | 1  | 0  | 1  | 1  | 1  | 0  | 0  | 0  | 11  | 2   | 1   | 18  | 2   | 3   |
| 0.006 | 0.003 | 0.008 | 0  | 5  | 2  | 0  | 0  | 1  | 3  | 3  | 1  | 29  | 19  | 17  | 20  | 6   | 18  |
| 0.009 | 0.009 | 0.006 | 2  | 1  | 15 | 1  | 3  | 2  | 4  | 3  | 3  | 100 | 62  | 86  | 115 | 185 | 84  |
| 0.014 | 0.011 | 0.004 | 1  | 0  | 1  | 0  | 0  | 1  | 0  | 0  | 0  | 4   | 4   | 7   | 11  | 16  | 5   |
| 0.008 | 0.013 | 0.010 | 0  | 1  | 1  | 0  | 4  | 3  | 0  | 1  | 1  | 8   | 2   | 1   | 4   | 9   | 5   |
| 0.012 | 0.011 | 0.017 | 12 | 6  | 26 | 5  | 30 | 8  | 7  | 8  | 0  | 22  | 18  | 13  | 49  | 14  | 21  |
| 0.016 | 0.011 | 0.005 | 2  | 1  | 2  | 1  | 0  | 0  | 1  | 2  | 0  | 9   | 14  | 13  | 45  | 43  | 16  |
| 0.010 | 0.004 | 0.010 | 1  | 1  | 6  | 2  | 0  | 0  | 0  | 1  | 2  | 21  | 6   | 13  | 26  | 8   | 18  |
| 0.010 | 0.008 | 0.010 | 3  | 1  | 2  | 3  | 3  | 2  | 1  | 3  | 1  | 17  | 6   | 11  | 17  | 24  | 20  |
| 0.007 | 0.009 | 0.009 | 2  | 0  | 2  | 1  | 5  | 4  | 3  | 1  | 1  | 7   | 12  | 13  | 7   | 13  | 11  |
| 0.004 | 0.013 | 0.004 | 0  | 4  | 0  | 1  | 0  | 0  | 1  | 0  | 1  | 5   | 7   | 9   | 2   | 11  | 3   |
| 0.007 | 0.008 | 0.005 | 4  | 4  | 27 | 6  | 24 | 10 | 9  | 5  | 10 | 98  | 97  | 92  | 113 | 202 | 115 |
| 0.009 | 0.008 | 0.003 | 2  | 1  | 2  | 0  | 2  | 1  | 0  | 0  | 0  | 23  | 8   | 1   | 34  | 11  | 4   |
| 0.009 | 0.009 | 0.011 | 7  | 5  | 11 | 12 | 13 | 7  | 6  | 7  | 9  | 13  | 25  | 33  | 18  | 30  | 29  |
| 0.003 | 0.008 | 0.004 | 0  | 0  | 1  | 1  | 0  | 2  | 0  | 0  | 0  | 10  | 9   | 5   | 2   | 13  | 5   |
| 0.018 | 0.005 | 0.001 | 1  | 1  | 2  | 2  | 2  | 0  | 3  | 0  | 1  | 4   | 3   | 7   | 8   | 6   | 1   |
| 0.004 | 0.005 | 0.006 | 0  | 0  | 2  | 0  | 0  | 0  | 0  | 0  | 2  | 8   | 7   | 6   | 8   | 4   | 5   |
| 0.014 | 0.001 | 0.004 | 0  | 1  | 0  | 0  | 1  | 0  | 2  | 0  | 0  | 4   | 1   | 12  | 17  | 1   | 5   |
| 0.005 | 0.007 | 0.010 | 3  | 4  | 0  | 0  | 1  | 0  | 4  | 0  | 0  | 5   | 7   | 4   | 5   | 9   | 13  |
| 0.007 | 0.011 | 0.000 | 1  | 2  | 3  | 0  | 2  | 1  | 1  | 0  | 1  | 5   | 3   | 4   | 9   | 14  | 0   |

|       |       |       |    |    |    |    |    |    |    |    |    |     |    |    |     |     |     |
|-------|-------|-------|----|----|----|----|----|----|----|----|----|-----|----|----|-----|-----|-----|
| 0.010 | 0.004 | 0.003 | 0  | 0  | 1  | 0  | 0  | 0  | 0  | 1  | 0  | 5   | 6  | 3  | 18  | 10  | 7   |
| 0.003 | 0.003 | 0.005 | 0  | 0  | 0  | 1  | 0  | 0  | 0  | 0  | 1  | 8   | 7  | 8  | 6   | 7   | 10  |
| 0.004 | 0.007 | 0.003 | 8  | 7  | 10 | 9  | 25 | 23 | 5  | 4  | 12 | 55  | 78 | 74 | 63  | 180 | 72  |
| 0.007 | 0.007 | 0.006 | 29 | 11 | 18 | 2  | 51 | 39 | 33 | 13 | 0  | 21  | 47 | 86 | 257 | 115 | 104 |
| 0.006 | 0.002 | 0.005 | 2  | 1  | 2  | 1  | 1  | 0  | 1  | 1  | 2  | 2   | 7  | 7  | 9   | 4   | 7   |
| 0.004 | 0.008 | 0.000 | 0  | 0  | 4  | 0  | 0  | 1  | 1  | 0  | 1  | 19  | 8  | 4  | 25  | 69  | 4   |
| 0.003 | 0.004 | 0.002 | 1  | 4  | 3  | 4  | 4  | 5  | 2  | 1  | 0  | 41  | 22 | 19 | 57  | 58  | 32  |
| 0.003 | 0.002 | 0.003 | 0  | 0  | 0  | 0  | 0  | 3  | 0  | 1  | 4  | 7   | 5  | 2  | 14  | 4   | 6   |
| 0.003 | 0.004 | 0.001 | 0  | 1  | 10 | 0  | 2  | 8  | 3  | 0  | 9  | 71  | 40 | 25 | 114 | 188 | 38  |
| 0.004 | 0.001 | 0.002 | 0  | 0  | 0  | 0  | 1  | 0  | 0  | 0  | 0  | 7   | 4  | 6  | 14  | 4   | 6   |
| 0.002 | 0.003 | 0.002 | 6  | 2  | 4  | 13 | 13 | 7  | 6  | 2  | 4  | 26  | 26 | 23 | 23  | 48  | 24  |
| 0.002 | 0.002 | 0.001 | 0  | 3  | 8  | 0  | 2  | 5  | 0  | 2  | 5  | 93  | 57 | 34 | 93  | 103 | 76  |
| 0.002 | 0.002 | 0.001 | 4  | 4  | 8  | 6  | 8  | 6  | 7  | 0  | 3  | 37  | 10 | 12 | 28  | 32  | 15  |
| 0.002 | 0.002 | 0.001 | 1  | 2  | 3  | 2  | 6  | 5  | 1  | 3  | 0  | 25  | 21 | 21 | 22  | 37  | 16  |
| 0.002 | 0.000 | 0.001 | 6  | 5  | 28 | 0  | 8  | 6  | 1  | 7  | 1  | 327 | 78 | 72 | 350 | 46  | 126 |
| 0.001 | 0.002 | 0.001 | 0  | 0  | 0  | 0  | 0  | 0  | 0  | 0  | 0  | 12  | 11 | 16 | 15  | 42  | 14  |
| 0.002 | 0.001 | 0.001 | 0  | 1  | 3  | 2  | 1  | 1  | 1  | 2  | 5  | 10  | 4  | 4  | 9   | 3   | 5   |
| 0.001 | 0.001 | 0.000 | 1  | 0  | 1  | 1  | 0  | 0  | 0  | 0  | 0  | 7   | 5  | 1  | 11  | 15  | 5   |
| 0.001 | 0.000 | 0.001 | 3  | 1  | 0  | 1  | 3  | 4  | 1  | 0  | 2  | 13  | 10 | 7  | 12  | 8   | 10  |
| 0.001 | 0.001 | 0.001 | 0  | 2  | 0  | 0  | 2  | 2  | 4  | 0  | 6  | 8   | 8  | 10 | 6   | 10  | 8   |
| 0.000 | 0.000 | 0.001 | 0  | 0  | 1  | 2  | 0  | 0  | 0  | 2  | 1  | 9   | 6  | 14 | 2   | 6   | 12  |
| 0.001 | 0.001 | 0.001 | 0  | 0  | 4  | 1  | 0  | 0  | 2  | 0  | 0  | 4   | 10 | 6  | 14  | 16  | 11  |
| 0.001 | 0.001 | 0.000 | 1  | 0  | 4  | 0  | 3  | 2  | 1  | 0  | 0  | 5   | 3  | 4  | 10  | 11  | 3   |
| 0.000 | 0.000 | 0.000 | 9  | 26 | 24 | 0  | 23 | 11 | 4  | 20 | 5  | 101 | 63 | 43 | 134 | 59  | 41  |
| 0.000 | 0.000 | 0.000 | 6  | 17 | 10 | 7  | 15 | 13 | 18 | 7  | 14 | 17  | 16 | 25 | 21  | 31  | 24  |
| 0.419 | 0.667 | 0.632 | 24 | 7  | 13 | 30 | 10 | 9  | 7  | 9  | 5  | 13  | 50 | 47 | 13  | 48  | 24  |
| 0.800 | 0.455 | 0.846 | 4  | 6  | 3  | 8  | 3  | 6  | 1  | 4  | 2  | 1   | 7  | 8  | 8   | 5   | 11  |
| 0.242 | 0.412 | 0.221 | 2  | 3  | 13 | 4  | 10 | 17 | 8  | 4  | 4  | 26  | 21 | 22 | 36  | 75  | 19  |
| 0.750 | 0.600 | 0.467 | 1  | 0  | 0  | 0  | 0  | 1  | 0  | 0  | 0  | 7   | 18 | 11 | 3   | 3   | 7   |
| 0.921 | 0.893 | 0.896 | 0  | 3  | 6  | 3  | 1  | 1  | 0  | 0  | 0  | 41  | 64 | 54 | 35  | 92  | 43  |
| 0.538 | 0.286 | 0.462 | 2  | 2  | 0  | 1  | 1  | 0  | 1  | 2  | 0  | 7   | 7  | 5  | 7   | 2   | 6   |
| 0.625 | 0.750 | 0.500 | 0  | 0  | 0  | 1  | 0  | 0  | 0  | 0  | 0  | 5   | 15 | 9  | 5   | 9   | 3   |
| 0.040 | 0.081 | 0.037 | 2  | 0  | 8  | 0  | 1  | 1  | 1  | 1  | 0  | 20  | 24 | 9  | 60  | 42  | 16  |
| 0.778 | 0.615 | 0.733 | 2  | 1  | 1  | 0  | 0  | 0  | 0  | 1  | 0  | 2   | 5  | 7  | 7   | 8   | 11  |

## SI References

1. J. T. Robinson *et al.*, Integrative genomics viewer. *Nat Biotechnol* **29**, 24-26 (2011).
2. E. A. Obeng *et al.*, Physiologic Expression of Sf3b1(K700E) Causes Impaired Erythropoiesis, Aberrant Splicing, and Sensitivity to Therapeutic Spliceosome Modulation. *Cancer Cell* **30**, 404-417 (2016).
3. H. Dolatshad *et al.*, Disruption of SF3B1 results in deregulated expression and splicing of key genes and pathways in myelodysplastic syndrome hematopoietic stem and progenitor cells. *Leukemia* **29**, 1798 (2015).
4. C. DeBoever *et al.*, Transcriptome sequencing reveals potential mechanism of cryptic 3' splice site selection in SF3B1-mutated cancers. *PLoS Comput Biol* **11**, e1004105 (2015).
5. A. M. Ali *et al.*, Severely impaired terminal erythroid differentiation as an independent prognostic marker in myelodysplastic syndromes. *Blood Adv* **2**, 1393-1402 (2018).
6. J. Zhang *et al.*, Disease-Causing Mutations in SF3B1 Alter Splicing by Disrupting Interaction with SUGP1. *Mol Cell* **76**, 82-95 e87 (2019).
